# Supplementary material for: Photoinduced reductive Reformatsky reaction of α-haloesters and aldehydes or ketones by cooperative dual-metal catalysis
Source: Royal Society of Chemistry journal article supplement (doi:10.1039/d3cc04671k), 2023-01-01

Supporting Information for

## **Photoinduced Reductive Reformatsky Reaction of $\alpha$ -Haloesters and Aldehydes or Ketones by Cooperative Dual-Metal Catalysis**

Qi-Long Chen,<sup>a</sup> Le Mao,<sup>a</sup> Yi-Fan Pan,<sup>a</sup> Heng Cai,<sup>a</sup> Xiao-Ming Zhang,<sup>a\*</sup> Fu-Min Zhang,<sup>a</sup> Ai-Jun Ma,<sup>b</sup> Jin-Bao Peng,<sup>b</sup> and Yong-Qiang Tu<sup>a</sup>

<sup>a</sup>State Key Laboratory of Applied Organic Chemistry & College of Chemistry and Chemical Engineering, Lanzhou University, Lanzhou 730000, P. R. China.

<sup>b</sup>School of Biotechnology and Health Sciences, Wuyi University, Jiangmen, Guangdong 529020, P. R. China.

email: [zhangxiaom@lzu.edu.cn](mailto:zhangxiaom@lzu.edu.cn)

### **Table of Contents**

|                                                               |    |
|---------------------------------------------------------------|----|
| 1. General Information .....                                  | 2  |
| 2. Optimization of the Reaction Conditions .....              | 3  |
| 3. General Procedure for Reductive Reformatsky Reaction ..... | 8  |
| 4. Mechanistic Studies .....                                  | 25 |
| 5. References .....                                           | 29 |
| 6. Copies of NMR Spectra of New Compounds .....               | 30 |

## 1. General Information

All moisture or air sensitive reactions were carried out under an argon atmosphere in oven-dried flasks. Except for commercially available ultradry solvents (DMF, DMSO, 1,4-dioxane, ethyl acetate, and CH<sub>3</sub>CN), all solvents were purified by standard methods as indicated and were transferred under argon. Toluene and THF were distilled from sodium, while DCM was distilled from CaH<sub>2</sub>. All other commercially available reagents were used as received without further purification unless otherwise noted. All reactions were monitored by thin-layer chromatography (TLC) on silica gel F<sub>254</sub> plates using UV light as visualizing agent (if applicable). The products were purified by flash column chromatography on silica gel (200-300 meshes).

<sup>1</sup>H NMR and <sup>13</sup>C NMR spectra were recorded in CDCl<sub>3</sub> solution on Bruker AVANCE<sup>III</sup> 400 MHz, Bruker AVANCE<sup>III</sup> HD 400 MHz or Bruker AVANCE NEO 600 MHz instrument. Chemical shifts were denoted in ppm (δ) and calibrated by using residual undeuterated solvent (CHCl<sub>3</sub> (7.27 ppm), tetramethylsilane (0.00 ppm)) as internal reference for <sup>1</sup>H NMR and the deuterated solvent (CDCl<sub>3</sub> (77.00 ppm) as internal standard for <sup>13</sup>C NMR. The following abbreviations were used to represent the multiplicities: s = singlet, d = doublet, t = triplet, q = quartet, quint = quintet, dd = double doublet, dt = double triplet, brs = broad singlet, m = multiplet. High-resolution mass spectral analysis (HRMS) data were measured on a Bruker Apex<sup>II</sup> mass spectrometer by means of the ESI technique. The FT-IR spectra were recorded on Nicolet Nexus 670 FT-IR spectrometer using neat thin film technique with potassium bromide (KBr) salt plates.

## 2. Optimization of the Reaction Conditions

Table S1 Screening of iron catalysts<sup>a</sup>

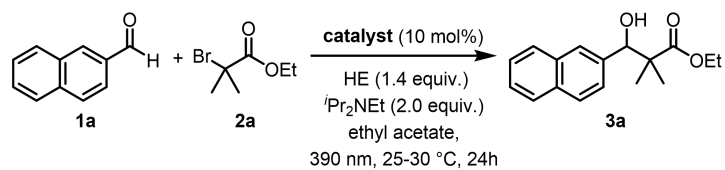

| entry | iron catalyst        | conversion (%) | yield (%) <sup>b</sup> |
|-------|----------------------|----------------|------------------------|
| 1     | FeBr <sub>3</sub>    | 46             | 28                     |
| 2     | Fe(OTf) <sub>3</sub> | 60             | 22                     |
| 3     | Fe(OAc) <sub>2</sub> | 80             | 19                     |
| 4     | FeBr <sub>2</sub>    | 40             | 36                     |
| 5     | FeCl <sub>2</sub>    | 62             | 18                     |
| 6     | FeCl <sub>3</sub>    | 65             | 17                     |

<sup>a</sup>Unless otherwise noted: reactions were conducted with **1a** (0.20 mmol), **2a** (0.50 mmol), iron catalyst (10 mol%), HE (1.4 equiv.), and <sup>t</sup>Pr<sub>2</sub>NEt (2.0 equiv.) in ethyl acetate (2.0 ml) at room temperature for 24 h under 40 W 390 nm light irradiation. <sup>b</sup>Yield determined by <sup>1</sup>H NMR analysis of the reaction mixture using 1,3,5-trimethoxybenzene as an internal standard.

**Table S2** Screening of solvents<sup>a</sup>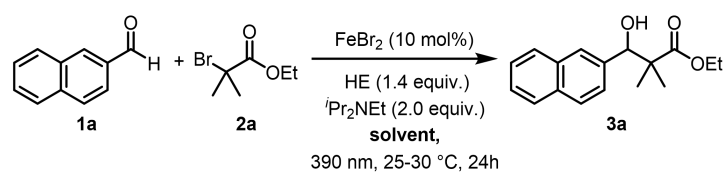

| entry | solvent                | conversion (%) | yield (%) <sup>b</sup> |
|-------|------------------------|----------------|------------------------|
| 1     | THF                    | 36             | 18                     |
| 2     | DCM                    | 42             | 7                      |
| 3     | 1,4-dioxane            | 18             | 9                      |
| 4     | $\text{CH}_3\text{CN}$ | 32             | 19                     |
| 5     | toluene                | 28             | 13                     |
| 6     | DMF                    | 37             | 13                     |
| 7     | DMSO                   | 38             | 21                     |
| 8     | EA                     | 40             | 36                     |

<sup>a</sup>Unless otherwise noted: reactions were conducted with **1a** (0.2 mmol), **2a** (0.5 mmol),  $\text{FeBr}_2$  (10 mol%), HE (1.4 equiv.), and  $i\text{Pr}_2\text{NEt}$  (2.0 equiv.) in solvent (2.0 ml) at room temperature for 24 h under 40 W 390 nm light irradiation. <sup>b</sup>Yield determined by  $^1\text{H}$  NMR analysis of the reaction mixture using 1,3,5-trimethoxybenzene as an internal standard.

**Table S3** Screening of additives<sup>a</sup>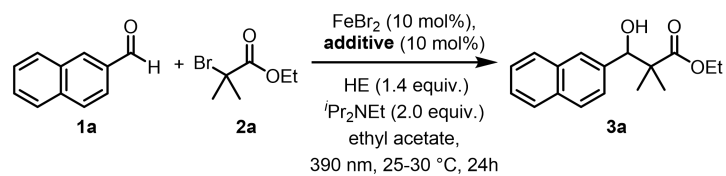

| entry | additive              | conversion (%) | yield (%) <sup>b</sup> |
|-------|-----------------------|----------------|------------------------|
| 1     | ZnBr <sub>2</sub>     | 58             | 24                     |
| 2     | ZnCl <sub>2</sub>     | 46             | 17                     |
| 3     | LiI                   | 49             | 38                     |
| 4     | LiBr                  | 67             | trace                  |
| 5     | LiCl                  | 63             | 33                     |
| 6     | MgCl <sub>2</sub>     | 81             | 33                     |
| 7     | Co(acac) <sub>3</sub> | 98             | 95 (93) <sup>c</sup>   |
| 8     | CoI <sub>2</sub>      | 42             | 30                     |
| 9     | CoBr <sub>2</sub>     | 47             | 22                     |

<sup>a</sup>Unless otherwise noted: reactions were conducted with **1a** (0.2 mmol), **2a** (0.5 mmol), FeBr<sub>2</sub> (10 mol), additive (10 mol%), HE (1.4 equiv.), and  $i\text{Pr}_2\text{NEt}$  (2.0 equiv.) in ethyl acetate (2.0 ml) at room temperature for 24 h under 40 W 390 nm light irradiation. <sup>b</sup>Yield determined by <sup>1</sup>H NMR analysis of the reaction mixture using 1,3,5-trimethoxybenzene as an internal standard. <sup>c</sup>Isolated yield.

**Table S4** Screening of bases<sup>a</sup>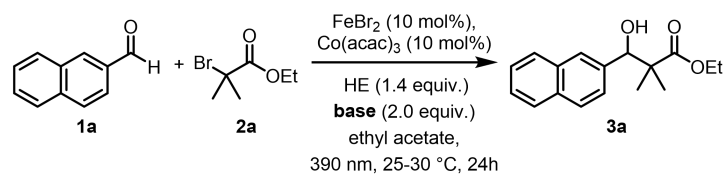

| entry | base                                 | conversion (%) | yield (%) <sup>b</sup> |
|-------|--------------------------------------|----------------|------------------------|
| 1     | Et <sub>3</sub> N                    | 95             | 87                     |
| 2     | Et <sub>2</sub> NH                   | 68             | 55                     |
| 3     | 2,6-lutidine                         | 85             | 54                     |
| 4     | DBU                                  | 55             | 51                     |
| 5     | NaHCO <sub>3</sub>                   | 59             | 53                     |
| 6     | K <sub>2</sub> CO <sub>3</sub>       | 61             | 56                     |
| 7     | <i>i</i> Pr <sub>2</sub> NEt         | 98             | 95 (93) <sup>c</sup>   |
| 8     | <i>i</i> Pr <sub>2</sub> NEt, 0.5 eq | 67             | 60                     |
| 9     | <i>i</i> Pr <sub>2</sub> NEt, 1.0 eq | 75             | 72                     |
| 10    | <i>i</i> Pr <sub>2</sub> NEt, 1.5 eq | 86             | 82                     |
| 11    | <i>i</i> Pr <sub>2</sub> NEt, 2.5 eq | 96             | 92                     |

<sup>a</sup>Unless otherwise noted: reactions were conducted with **1a** (0.2 mmol), **2a** (0.5 mmol), FeBr<sub>2</sub> (10 mol), Co(acac)<sub>3</sub> (10 mmol%), HE (1.4 equiv.), and base (2.0 equiv.) in ethyl acetate (2.0 ml) at room temperature for 24 h under 40 W 390 nm light irradiation. <sup>b</sup>Yield determined by <sup>1</sup>H NMR analysis of the reaction mixture using 1,3,5-trimethoxybenzene as an internal standard. <sup>c</sup>Isolated yield.

**Table S5** Control experiments<sup>a</sup>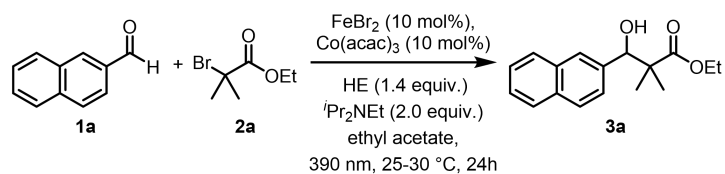

| entry | variation                                | conversion (%) | yield (%) <sup>b</sup> |
|-------|------------------------------------------|----------------|------------------------|
| 1     | none                                     | 98             | 95 (93) <sup>c</sup>   |
| 2     | without FeBr <sub>2</sub>                | 11             | 7                      |
| 3     | without Co(acac) <sub>3</sub>            | 40             | 36                     |
| 4     | without HE                               | 0              | 0                      |
| 5     | without <sup>i</sup> Pr <sub>2</sub> NEt | 59             | 42                     |
| 6     | without light                            | 0              | 0                      |
| 7     | 40W 427 nm LED                           | 75             | 65                     |
| 8     | 40W 440 nm LED                           | 55             | 46                     |
| 9     | 40W 450 nm LED                           | 52             | 45                     |
| 10    | 40W white LED                            | 30             | 22                     |

<sup>a</sup>Unless otherwise noted: reactions were conducted with **1a** (0.2 mmol), **2a** (0.5 mmol), FeBr<sub>2</sub> (10 mol), Co(acac)<sub>3</sub> (10 mol%), HE (1.4 equiv.), and <sup>i</sup>Pr<sub>2</sub>NEt (2.0 equiv.) in ethyl acetate (2.0 ml) at room temperature for 24 h under 40 W 390 nm light irradiation. <sup>b</sup>Yield determined by <sup>1</sup>H NMR analysis of the reaction mixture using 1,3,5-trimethoxybenzene as an internal standard. <sup>c</sup>Isolated yield.

### 3. General Procedure for Reductive Reformatsky Reaction

**General procedure:** Under an argon atmosphere, a 10 mL Schlenk tube was charged with **1** or **4** (0.2 mmol), **2** (0.5 mmol), FeBr<sub>2</sub> (0.02 mmol, 10 mol%), Co(acac)<sub>3</sub> (0.02 mmol, 10 mol%), HE (0.28 mmol, 1.4 equiv.), <sup>t</sup>Pr<sub>2</sub>NEt (0.4 mmol, 2.0 equiv.), and ethyl acetate (2 mL). Then, the reaction mixture was stirred at room temperature for 24 h under irradiation of 40 W 390 nm Kessil. The resulting mixture was concentrated in vacuum, and the residue was purified by flash column chromatography on silica gel to afford the desired product **3**, **5** or **6**.

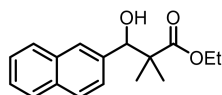

**3a**, 49.6 mg, 91% yield, white solid.

**M.p.** = 66-67 °C

**<sup>1</sup>H NMR** (400 MHz, CDCl<sub>3</sub>) δ 7.83 – 7.72 (m, 4H), 7.49 – 7.39 (m, 3H), 5.04 (d, *J* = 4.1 Hz, 1H), 4.17 (q, *J* = 7.1 Hz, 2H), 3.43 (d, *J* = 4.2 Hz, 1H), 1.24 (t, *J* = 7.1 Hz, 3H), 1.17 (s, 3H), 1.13 (s, 3H).

**<sup>13</sup>C NMR** (100 MHz, CDCl<sub>3</sub>) δ 177.8, 137.6, 132.9, 132.7, 128.0, 127.5, 127.2, 126.6, 125.9, 125.8, 125.7, 78.7, 60.9, 47.7, 23.1, 19.1, 14.0.

**HRMS (ESI)** calcd for [M+Na<sup>+</sup>]: C<sub>17</sub>H<sub>20</sub>NaO<sub>3</sub>, *m/z*: 295.1305, found: 295.1304, Error: 0.3 ppm.

**IR (KBr):** 3491, 2980, 1717, 1365, 1262, 1175, 1054, 480.cm<sup>-1</sup>

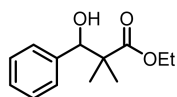

**3b**, 40.8 mg, 92% yield, colorless oil.

**<sup>1</sup>H NMR** (600 MHz, CDCl<sub>3</sub>) δ 7.34 – 7.25 (m, 5H), 4.89 (d, *J* = 4.1 Hz, 1H), 4.18 (q, *J* = 7.1 Hz, 2H), 3.20 (d, *J* = 4.2 Hz, 1H), 1.26 (t, *J* = 7.1 Hz, 3H), 1.14 (s, 3H), 1.11 (s, 3H) ppm.

**<sup>13</sup>C NMR** (150 MHz, CDCl<sub>3</sub>) δ 177.8, 140.0, 127.7, 127.7, 78.7, 60.9, 47.5, 23.1, 19.0, 14.1.

**HRMS (ESI)** calcd for [M+Na<sup>+</sup>]: C<sub>13</sub>H<sub>18</sub>NaO<sub>3</sub>, *m/z*: 245.1148, found: 245.1140, Error: 3.2 ppm.

**IR (KBr):** 3498, 2981, 1717, 1470, 1387, 1132, 898, 704 cm<sup>-1</sup>

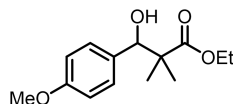

**3c**, 37.0 mg, 82% yield, colorless oil.

**<sup>1</sup>H NMR** (600 MHz, CDCl<sub>3</sub>) δ 7.23 (d, *J* = 8.1 Hz, 2H), 6.85 (d, *J* = 8.1 Hz, 2H), 4.85 (d, *J* = 3.4 Hz, 1H), 4.18 (q, *J* = 7.1 Hz, 2H), 3.80 (s, 3H), 3.12 (d, *J* = 3.8 Hz, 1H), 1.27 (t, *J* = 7.1 Hz, 3H), 1.13 (s, 3H), 1.09 (s, 3H).

**<sup>13</sup>C NMR** (150 MHz, CDCl<sub>3</sub>) δ 177.9, 159.1, 132.1, 128.8, 113.1, 78.3, 60.8, 55.20, 47.6, 23.1, 19.0, 14.1.

**HRMS (ESI)** calcd for [M+Na<sup>+</sup>]: C<sub>14</sub>H<sub>20</sub>NaO<sub>4</sub>, *m/z*: 275.1254, found: 275.1252, Error: 0.6 ppm.

**IR (KBr):** 3501, 2980, 2938, 2937, 1718, 1612, 1584, 1513, 1249, 1132, 839 cm<sup>-1</sup>



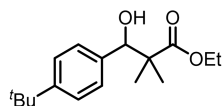

**3d**, 48.3 mg, 86% yield, white solid.

**M.p.** = 62-63 °C

**<sup>1</sup>H NMR** (400 MHz, CDCl<sub>3</sub>) δ 7.35 – 7.29 (m, 2H), 7.23 (d, *J* = 8.3 Hz, 2H), 4.86 (d, *J* = 4.0 Hz, 1H), 4.17 (q, *J* = 7.1 Hz, 2H), 3.08 (d, *J* = 4.2 Hz, 1H), 1.31 (s, 9H), 1.26 (t, *J* = 7.1 Hz, 3H), 1.14 (s, 3H), 1.10 (s, 3H).

**<sup>13</sup>C NMR** (100 MHz, CDCl<sub>3</sub>) δ 177.8, 150.5, 137.0, 127.3, 124.6, 78.5, 60.8, 47.5, 34.4, 31.3, 23.0, 19.0, 14.1.

**HRMS (ESI)** calcd for [M+Na<sup>+</sup>]: C<sub>17</sub>H<sub>26</sub>NaO<sub>3</sub>, m/z: 301.1774, found: 301.1761, Error: 4.5 ppm.

**IR (KBr)**: 3499, 2965, 1719, 1131, 1109, 708, 576 cm<sup>-1</sup>

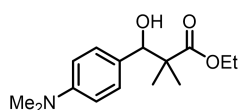

**3e**, 49.3 mg, 93% yield, colorless oil.

**<sup>1</sup>H NMR** (600 MHz, CDCl<sub>3</sub>) δ 7.09 (d, *J* = 8.7 Hz, 2H), 6.60 (d, *J* = 8.7 Hz, 2H), 4.73 (d, *J* = 2.6 Hz, 1H), 4.10 (q, *J* = 7.1 Hz, 2H), 2.89 (d, *J* = 3.5 Hz, 1H), 2.85 (s, 6H), 1.19 (t, *J* = 7.1 Hz, 3H), 1.06 (s, 3H), 1.00 (s, 3H)

**<sup>13</sup>C NMR** (150 MHz, CDCl<sub>3</sub>) δ 177.9, 150.1, 128.4, 127.9, 111.7, 78.5, 60.7, 47.7, 40.5, 23.1, 18.9, 14.1.

**HRMS (ESI)** calcd for [M+Na<sup>+</sup>]: C<sub>15</sub>H<sub>23</sub>NaO<sub>3</sub>, m/z: 228.1570, found: 288.1562, Error: 2.8 ppm.

**IR (KBr)**: 3506, 2979, 2802, 1720, 1614, 1527, 1470, 1385, 1348, 1253, 544 cm<sup>-1</sup>

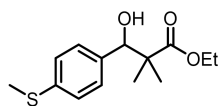

**3f**, 58.3 mg, 98%, colorless oil.

**<sup>1</sup>H NMR** (600 MHz, CDCl<sub>3</sub>) δ 7.26 – 7.13 (m, 4H), 4.84 (s, 1H), 4.16 (q, *J* = 7.1 Hz, 2H), 3.27 (d, *J* = 4.1 Hz, 1H), 2.47 (d, *J* = 1.1 Hz, 3H), 1.26 (td, *J* = 7.1, 1.0 Hz, 3H), 1.12 (s, 3H), 1.08 (s, 3H).

**<sup>13</sup>C NMR** (151 MHz, CDCl<sub>3</sub>) δ 177.6, 137.6, 136.9, 128.1, 125.7, 78.1, 77.2, 77.0, 76.8, 60.8, 47.5, 22.9, 18.9, 15.7, 14.0.

**HRMS (ESI)** calcd for [M+Na<sup>+</sup>]: C<sub>14</sub>H<sub>20</sub>NaO<sub>3</sub>S, m/z: 291.1020, found: 288.291.1025, Error: 1.9 ppm.

**IR (KBr)**: 3485, 2980, 2922, 1716, 1493, 1131 cm<sup>-1</sup>

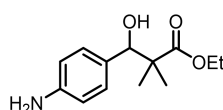

**3g**, 25.1 mg, 53% yield, colorless oil.

**<sup>1</sup>H NMR** (400 MHz, CDCl<sub>3</sub>) δ 7.12 – 7.05 (m, 2H), 6.66 – 6.58 (m, 2H), 4.78 (s, 1H), 4.17 (q, *J* = 7.1 Hz, 2H), 3.68 (d, *J* = 36.3 Hz, 2H), 3.22 – 2.79 (m, 1H), 1.27 (t, *J* = 7.1 Hz, 3H), 1.12 (s, 3H), 1.08 (s, 3H).

$^{13}\text{C}$  NMR (101 MHz,  $\text{CDCl}_3$ )  $\delta$  178.0, 145.2, 130.1, 128.7, 114.4, 78.5, 77.4, 77.0, 76.7, 60.8, 47.7, 23.1, 19.0, 14.1.

HRMS (ESI) calcd for  $[\text{M}+\text{Na}^+]$ :  $\text{C}_{13}\text{H}_{19}\text{NNaO}_3$ ,  $m/z$ : 260.1248, found: 260.1257, Error: 3.6 ppm.

IR (KBr): 3421, 2972, 2922, 1711, 1621, 1048  $\text{cm}^{-1}$

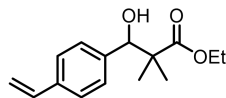

**3h**, 35.3 mg, 71% yield, colorless oil.

$^1\text{H}$  NMR (600 MHz,  $\text{CDCl}_3$ )  $\delta$  7.36 (d,  $J = 8.1$  Hz, 2H), 7.27 (d,  $J = 7.9$  Hz, 2H), 6.71 (dd,  $J = 17.6, 10.9$  Hz, 1H), 5.75 (d,  $J = 17.6$  Hz, 1H), 5.24 (d,  $J = 10.9$  Hz, 1H), 4.88 (d,  $J = 3.4$  Hz, 1H), 4.18 (q,  $J = 7.1$  Hz, 2H), 3.19 (d,  $J = 4.0$  Hz, 1H), 1.27 (t,  $J = 7.1$  Hz, 3H), 1.13 (s, 3H), 1.11 (s, 3H).

$^{13}\text{C}$  NMR (150 MHz,  $\text{CDCl}_3$ )  $\delta$  177.8, 139.6, 137.0, 136.4, 127.9, 125.6, 113.8, 78.4, 60.9, 47.5, 23.1, 19.0, 14.1.

HRMS (ESI) calcd for  $[\text{M}+\text{Na}^+]$ :  $\text{C}_{15}\text{H}_{20}\text{NaO}_3$ ,  $m/z$ : 271.1305, found: 271.1292, Error: 4.8 ppm.

IR (KBr): 3479, 2981, 2937, 1715, 1608, 1132, 1053, 904  $\text{cm}^{-1}$

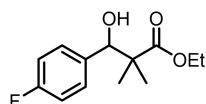

**3i**, 34.8 mg, 73% yield, colorless oil.

$^1\text{H}$  NMR (600 MHz,  $\text{CDCl}_3$ )  $\delta$  7.30 – 7.25 (m, 2H), 7.00 (t,  $J = 8.7$  Hz, 2H), 4.87 (d,  $J = 4.1$  Hz, 1H), 4.17 (q,  $J = 7.1$  Hz, 2H), 3.32 (d,  $J = 4.2$  Hz, 1H), 1.26 (t,  $J = 7.1$  Hz, 3H), 1.12 (s, 3H), 1.09 (s, 3H).

$^{13}\text{C}$  NMR (150 MHz,  $\text{CDCl}_3$ )  $\delta$  177.7, 162.3(d,  $J_{\text{C-F}} = 244.6$  Hz), 135.7 (d,  $J_{\text{C-F}} = 3.1$  Hz), 129.2 (d,  $J_{\text{C-F}} = 8.5$  Hz), 114.5 (d,  $J_{\text{C-F}} = 21.2$  Hz), 77.9, 61.0, 47.5, 22.9, 19.0, 14.1.

$^{19}\text{F}$  NMR (376 MHz,  $\text{CDCl}_3$ )  $\delta$  -114.93.

HRMS (ESI) calcd for  $[\text{M}+\text{Na}^+]$ :  $\text{C}_{13}\text{H}_{17}\text{FNaO}_3$ ,  $m/z$ : 263.1054, found: 263.1045, Error: 3.2 ppm.

IR (KBr): 3494, 2982, 2908, 1717, 1604, 1471, 812, 780, 578  $\text{cm}^{-1}$

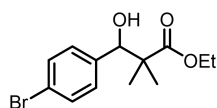

**3j**, 49.3 mg, 82% yield, colorless oil.

$^1\text{H}$  NMR (600 MHz,  $\text{CDCl}_3$ )  $\delta$  7.44 (d,  $J = 8.4$  Hz, 2H), 7.18 (d,  $J = 8.3$  Hz, 2H), 4.84 (d,  $J = 4.1$  Hz, 1H), 4.17 (q,  $J = 7.1$  Hz, 2H), 3.33 (d,  $J = 4.2$  Hz, 1H), 1.27 (t,  $J = 7.1$  Hz, 3H), 1.11 (s, 3H), 1.09 (s, 3H).

$^{13}\text{C}$  NMR (150 MHz,  $\text{CDCl}_3$ )  $\delta$  177.6, 139.0, 130.8, 129.4, 121.6, 78.0, 61.0, 47.3, 22.9, 19.0, 14.1.

HRMS (ESI) calcd for  $[\text{M}+\text{Na}^+]$ :  $\text{C}_{13}\text{H}_{17}\text{BrNaO}_3$ ,  $m/z$ : 323.0253, found: 323.0249, Error: 1.4 ppm.

IR (KBr): 3488, 2980, 2938, 1716, 1471, 1366, 867, 835  $\text{cm}^{-1}$

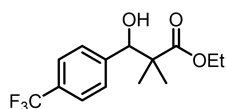

**3k**, 48.8 mg, 84% yield, white solid.

**M.p.** : 62-63 °C

**<sup>1</sup>H NMR** (400 MHz, CDCl<sub>3</sub>) δ 7.57 (d, *J* = 8.2 Hz, 2H), 7.43 (d, *J* = 8.3 Hz, 2H), 4.94 (d, *J* = 3.8 Hz, 1H), 4.18 (q, *J* = 7.1 Hz, 2H), 3.51 (d, *J* = 4.2 Hz, 1H), 1.26 (t, *J* = 7.1 Hz, 3H), 1.12 (d, *J* = 8.0 Hz, 6H).

**<sup>13</sup>C NMR** (100 MHz, CDCl<sub>3</sub>) δ 177.5, 144.0, 129.8 (q, *J*<sub>C-F</sub> = 32.2 Hz), 128.1, 125.6, (q, *J*<sub>C-F</sub> = 3.8 Hz) 124.1 (q, *J*<sub>C-F</sub> = 270.3 Hz), 124.6, 124.6, 124.5, 122.8, 120.1, 78.0, 61.1, 47.4, 22.8, 19.0, 14.0.

**<sup>19</sup>F NMR** (376 MHz, CDCl<sub>3</sub>) δ -62.54.

**HRMS (ESI)** calcd for [M+Na<sup>+</sup>]: C<sub>14</sub>H<sub>17</sub>F<sub>3</sub>NaO<sub>3</sub>, m/z: 313.1022, found: 313.1018, Error: 1.3 ppm.

**IR (KBr)**: 3480, 2983, 2940, 1715, 1327, 1126, 1068, 1017 cm<sup>-1</sup>

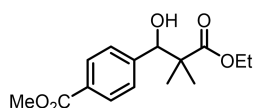

**3l**, 46.7 mg, 83% yield, colorless oil.

**<sup>1</sup>H NMR** (600 MHz, CDCl<sub>3</sub>) δ 7.98 (d, *J* = 8.0 Hz, 2H), 7.38 (d, *J* = 8.0 Hz, 2H), 4.94 (d, *J* = 4.1 Hz, 1H), 4.18 (q, *J* = 7.1 Hz, 2H), 3.91 (s, 3H), 3.47 (d, *J* = 4.2 Hz, 1H), 1.26 (t, *J* = 7.1 Hz, 3H), 1.12 (s, 3H), 1.10 (s, 3H).

**<sup>13</sup>C NMR** (150 MHz, CDCl<sub>3</sub>) δ 177.5, 166.9, 145.2, 129.4, 128.9, 127.7, 78.2, 61.0, 52.0, 47.4, 22.8, 19.1, 14.0.

**HRMS (ESI)** calcd for [M+Na<sup>+</sup>]: C<sub>15</sub>H<sub>20</sub>NaO<sub>5</sub>, m/z: 303.1203, found: 303.1192, Error: 3.5 ppm.

**IR (KBr)**: 3498, 2982, 1722, 1469, 1282, 1116, 1019 cm<sup>-1</sup>

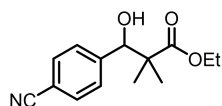

**3m**, 37.4 mg, 76% yield, colorless oil.

**<sup>1</sup>H NMR** (600 MHz, CDCl<sub>3</sub>) δ 7.61 (d, *J* = 7.5 Hz, 2H), 7.44 (d, *J* = 7.7 Hz, 2H), 4.94 (d, *J* = 3.8 Hz, 1H), 4.18 (q, *J* = 7.1 Hz, 2H), 3.56 (d, *J* = 4.0 Hz, 1H), 1.27 (t, *J* = 7.1 Hz, 3H), 1.11 (d, *J* = 10.0 Hz, 6H)

**<sup>13</sup>C NMR** (150 MHz, CDCl<sub>3</sub>) δ 177.3, 145.4, 131.4, 128.4, 118.7, 111.4, 77.8, 61.1, 47.4, 22.7, 19.1, 14.0.

**HRMS (ESI)** calcd for [M+Na<sup>+</sup>]: C<sub>14</sub>H<sub>17</sub>NNaO<sub>3</sub>, m/z: 270.1101, found: 270.1100, Error: 0.2 ppm.

**IR (KBr)**: 3484, 2982, 2939, 2229, 1717, 1470, 1133, 1059, 851 cm<sup>-1</sup>

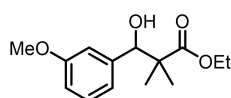

**3n**, 36.7 mg, 73% yield, colorless oil.

**<sup>1</sup>H NMR** (400 MHz, CDCl<sub>3</sub>) δ 7.28 – 7.18 (m, 1H), 6.92 – 6.85 (m, 2H), 6.85 – 6.79 (m, 1H), 4.86 (d, *J* = 3.7 Hz, 1H), 4.18 (q, *J* = 7.1 Hz, 2H), 3.79 (s, 3H), 3.23 (d, *J* = 4.1 Hz, 1H), 1.27 (t, *J* = 7.1 Hz, 3H), 1.14 (s, 3H), 1.11 (s, 3H).

**<sup>13</sup>C NMR** (100 MHz, CDCl<sub>3</sub>) δ 177.7, 159.1, 141.7, 128.6, 120.1, 113.4, 113.0, 78.5, 60.9, 55.1, 47.5, 23.0, 19.1, 14.1.

**HRMS (ESI)** calcd for [M+Na<sup>+</sup>]: C<sub>14</sub>H<sub>20</sub>NaO<sub>3</sub>, *m/z*: 275.1254, found: 275.1247, Error: 2.6 ppm.

**IR (KBr)**: 3481, 2981, 2939, 1717, 1603, 1467, 1259, 1132, 1094 cm<sup>-1</sup>

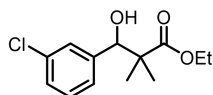

**3o**, 40.0 mg, 78% yield, colorless oil.

**<sup>1</sup>H NMR** (400 MHz, CDCl<sub>3</sub>) δ 7.31 (s, 1H), 7.28 – 7.21 (m, 2H), 7.20 – 7.14 (m, 1H), 4.84 (d, *J* = 4.3 Hz, 1H), 4.17 (q, *J* = 7.1 Hz, 2H), 3.40 (d, *J* = 4.4 Hz, 1H), 1.27 (t, *J* = 7.1 Hz, 3H), 1.13 (s, 3H), 1.11 (s, 3H).

**<sup>13</sup>C NMR** (100 MHz, CDCl<sub>3</sub>) δ 177.5, 142.1, 133.7, 128.9, 127.8, 127.7, 125.9, 78.0, 61.0, 47.4, 22.8, 19.1, 14.0.

**HRMS (ESI)** calcd for [M+Na<sup>+</sup>]: C<sub>13</sub>H<sub>17</sub>ClNaO<sub>3</sub>, *m/z*: 279.0758, found: 279.0756, Error: 0.8 ppm.

**IR (KBr)**: 3485, 2981, 2939, 1715, 1471, 1272, 1133, 783 cm<sup>-1</sup>

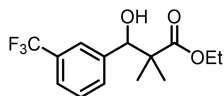

**3p**, 50.0 mg, 83% yield, colorless oil.

**<sup>1</sup>H NMR** (400 MHz, CDCl<sub>3</sub>) δ 7.49 (m, *J* = 28.1, 15.3, 7.7 Hz, 4H), 4.93 (d, *J* = 4.3 Hz, 1H), 4.17 (q, *J* = 7.1 Hz, 2H), 3.50 (d, *J* = 4.4 Hz, 1H), 1.26 (t, *J* = 7.1 Hz, 3H), 1.13 (s, 3H), 1.11 (s, 3H).

**<sup>13</sup>C NMR** (151 MHz, CDCl<sub>3</sub>) δ 177.5, 141.1, 131.1, 130.2 (q, *J*<sub>C-F</sub> = 32.3 Hz), 128.1, 125.0 (q, *J*<sub>C-F</sub> = 541.4 Hz), 124.5 (q, *J*<sub>C-F</sub> = 3.3 Hz), 124.4 (q, *J*<sub>C-F</sub> = 3.7 Hz), 123.2, 121.4, 78.1, 61.1, 47.5, 22.7, 19.2, 14.0.

**<sup>19</sup>F NMR** (376 MHz, CDCl<sub>3</sub>) δ -62.62.

**HRMS (ESI)** calcd for [M+Na<sup>+</sup>]: C<sub>14</sub>H<sub>17</sub>F<sub>3</sub>NaO<sub>3</sub>, *m/z*: 313.1022, found: 313.1015, Error: 2.2 ppm.

**IR (KBr)**: 3487, 2984, 2942, 1716, 1471, 1367, 1164, 1128, 708 cm<sup>-1</sup>

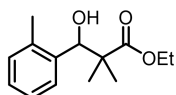

**3q**, 41.3 mg, 88% yield, colorless oil.

**<sup>1</sup>H NMR** (600 MHz, CDCl<sub>3</sub>) δ 7.43 (d, *J* = 7.3 Hz, 1H), 7.22 – 7.14 (m, 2H), 7.13 (d, *J* = 7.1 Hz, 1H), 5.24 (d, *J* = 4.4 Hz, 1H), 4.20 (q, *J* = 7.1 Hz, 2H), 3.26 (d, *J* = 4.4 Hz, 1H), 2.37 (s, 3H), 1.28 (t, *J* = 7.1 Hz, 3H), 1.19 (s, 3H), 1.12 (s, 3H).

**<sup>13</sup>C NMR** (150 MHz, CDCl<sub>3</sub>) δ 178.1, 138.5, 135.9, 130.3, 127.6, 127.4, 125.6, 73.5, 60.9, 48.3, 23.2, 20.2, 18.9, 14.0.

**HRMS (ESI)** calcd for [M+Na<sup>+</sup>]: C<sub>14</sub>H<sub>20</sub>NaO<sub>3</sub>, *m/z*: 259.1305, found: 259.1298, Error: 2.5 ppm.

**IR (KBr)**: 3499, 2981, 1718, 1470, 1252, 1134, 1040, 750 cm<sup>-1</sup>

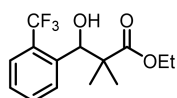

**3r**, 56.2 mg, 97% yield, colorless oil.

**<sup>1</sup>H NMR** (400 MHz, CDCl<sub>3</sub>) δ 7.66 (t, *J* = 9.0 Hz, 2H), 7.54 (t, *J* = 7.6 Hz, 1H), 7.39 (t, *J* = 7.6 Hz, 1H), 5.29 (d, *J* = 5.3 Hz, 1H), 4.23 (q, *J* = 7.1 Hz, 2H), 3.89 (d, *J* = 5.4 Hz, 1H), 1.29 (t, *J* = 7.1 Hz, 3H), 1.17 (d, *J* = 9.5 Hz, 6H).

**<sup>13</sup>C NMR** (100 MHz, CDCl<sub>3</sub>) δ 178.2, 139.6, 131.6, 128.4 (d, *J*<sub>C-F</sub> = 113.2 Hz), 128.5 (d, *J*<sub>C-F</sub> = 29.4 Hz), 125.9, 125.8 (q, *J*<sub>C-F</sub> = 5.9 Hz), 124.2 (q, *J*<sub>C-F</sub> = 27.5 Hz), 73.2, 61.2, 47.4, 24.1, 19.8, 14.0.

**<sup>19</sup>F NMR** (376 MHz, CDCl<sub>3</sub>) δ -55.97.

**HRMS (ESI)** calcd for [M+Na<sup>+</sup>]: C<sub>14</sub>H<sub>17</sub>F<sub>3</sub>NaO<sub>3</sub>, m/z: 313.1022, found: 313.1016, Error: 2.0 ppm.

**IR (KBr)**: 3483, 2985, 1716, 1309, 1156, 1123, 1033, 772 cm<sup>-1</sup>

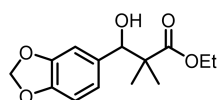

**3s**, 40.6 mg, 76% yield, colorless oil.

**<sup>1</sup>H NMR** (600 MHz, CDCl<sub>3</sub>) δ 6.83 (s, 1H), 6.74 (s, 2H), 5.94 (s, 2H), 4.80 (d, *J* = 3.7 Hz, 1H), 4.17 (d, *J* = 7.1 Hz, 2H), 3.21 (d, *J* = 3.8 Hz, 1H), 1.27 (t, *J* = 7.1 Hz, 3H), 1.13 (s, 3H), 1.09 (s, 3H).

**<sup>13</sup>C NMR** (150 MHz, CDCl<sub>3</sub>) δ 177.7, 147.2, 146.9, 134.0, 121.1, 108.1, 107.4, 100.9, 78.4, 76.8, 60.8, 47.5, 23.0, 19.1, 14.1.

**HRMS (ESI)** calcd for [M+Na<sup>+</sup>]: C<sub>14</sub>H<sub>18</sub>NaO<sub>5</sub>, m/z: 289.1046, found: 289.1042, Error: 1.4 ppm.

**IR (KBr)**: 3488, 2981, 2938, 1716, 1488, 1443, 1248, 1132, 1039 cm<sup>-1</sup>

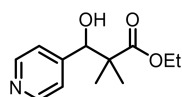

**3t**, 32.1 mg, 72% yield, colorless oil.

**<sup>1</sup>H NMR** (600 MHz, CDCl<sub>3</sub>) δ 8.51 (d, *J* = 5.2 Hz, 2H), 7.25 (d, *J* = 5.4 Hz, 2H), 4.89 (s, 1H), 4.18 (d, *J* = 7.1 Hz, 2H), 4.07 – 3.91 (m, 1H), 1.27 (t, *J* = 7.1 Hz, 3H), 1.13 (d, *J* = 7.1 Hz, 6H).

**<sup>13</sup>C NMR** (150 MHz, CDCl<sub>3</sub>) δ 177.3, 149.2, 149.1, 122.8, 76.8, 61.1, 47.3, 22.6, 19.2, 14.1.

**HRMS (ESI)** calcd for [M+Na<sup>+</sup>]: C<sub>12</sub>H<sub>18</sub>NNaO<sub>3</sub>, m/z: 224.1281, found: 224.1273, Error: 3.6 ppm.

**IR (KBr)**: 3421, 2981, 2939, 1723, 1603, 1258, 1131, 1061 cm<sup>-1</sup>

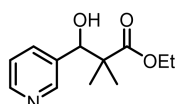

**3u**, 31.1 mg, 70% yield, colorless oil.

**<sup>1</sup>H NMR** (400 MHz, CDCl<sub>3</sub>) δ 8.45 (dd, *J* = 6.0, 2.6 Hz, 2H), 7.70 (dt, *J* = 7.9, 1.7 Hz, 1H), 7.25 (dd, *J* = 7.9, 4.8 Hz, 1H), 4.94 (s, 1H), 4.36 (s, 1H), 4.17 (q, *J* = 7.1 Hz, 2H), 1.26 (t, *J* = 7.1 Hz, 3H), 1.15 (s, 3H), 1.09 (s, 3H).

$^{13}\text{C}$  NMR (151 MHz,  $\text{CDCl}_3$ )  $\delta$  177.2, 177.2, 148.9, 148.9, 148.7, 148.6, 136.0, 135.4, 122.8, 76.1, 76.1, 61.0, 47.5, 22.4, 22.4, 19.1, 14.0.

**HRMS (ESI)** calcd for  $[\text{M}+\text{Na}^+]$ :  $\text{C}_{12}\text{H}_{18}\text{NNaO}_3$ ,  $m/z$ : 224.1281, found: 224.1277, Error: 1.8 ppm.

**IR (KBr)**: 3418, 2981, 2939, 1723, 1470, 1427, 1261, 1132, 1027  $\text{cm}^{-1}$

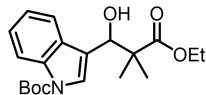

**3v**, 76.9 mg, 98% yield, colorless oil.

$^1\text{H}$  NMR (600 MHz,  $\text{CDCl}_3$ )  $\delta$  8.13 (d,  $J = 4.9$  Hz, 1H), 7.65 (d,  $J = 7.9$  Hz, 1H), 7.54 (s, 1H), 7.30 (t,  $J = 7.7$  Hz, 1H), 7.22 (t,  $J = 7.5$  Hz, 1H), 5.21 (d,  $J = 4.5$  Hz, 1H), 4.20 (q,  $J = 7.1$  Hz, 2H), 3.22 (d,  $J = 4.4$  Hz, 1H), 1.67 (s, 9H), 1.31 – 1.26 (m, 6H), 1.20 (s, 3H).

$^{13}\text{C}$  NMR (151 MHz,  $\text{CDCl}_3$ )  $\delta$  177.9, 149.6, 135.1, 129.9, 124.3, 124.0, 122.5, 120.3, 120.3, 115.1, 83.8, 72.6, 61.0, 47.9, 28.2, 23.2, 19.7, 14.1.

**HRMS (ESI)** calcd for  $[\text{M}+\text{Na}^+]$ :  $\text{C}_{20}\text{H}_{27}\text{NNaO}_5$ ,  $m/z$ : 384.1781, found: 384.1768, Error: 3.4 ppm.

**IR (KBr)**: 3502, 2980, 2936, 1734, 1453, 1371, 1257, 1157, 1049  $\text{cm}^{-1}$

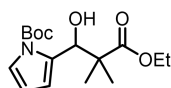

**3w**, 56.0 mg, 90% yield, colorless oil.

$^1\text{H}$  NMR (600 MHz,  $\text{CDCl}_3$ )  $\delta$  7.18 (dd,  $J = 3.3, 1.7$  Hz, 1H), 6.23 – 6.17 (m, 1H), 6.09 (t,  $J = 3.4$  Hz, 1H), 5.41 (d,  $J = 7.2$  Hz, 1H), 4.38 (d,  $J = 7.2$  Hz, 1H), 4.14 (q,  $J = 7.1$  Hz, 2H), 1.60 (s, 9H), 1.26 (s, 6H), 1.23 (t,  $J = 7.1$  Hz, 3H).

$^{13}\text{C}$  NMR (150 MHz,  $\text{CDCl}_3$ )  $\delta$  177.3, 150.2, 134.7, 122.2, 113.2, 110.0, 84.4, 71.6, 60.6, 47.7, 27.9, 22.0, 21.9, 14.0.

**HRMS (ESI)** calcd for  $[\text{M}+\text{Na}^+]$ :  $\text{C}_{16}\text{H}_{25}\text{NNaO}_5$ ,  $m/z$ : 334.1625, found: 334.1611, Error: 4.3 ppm.

**IR (KBr)**: 3483, 2982, 2939, 1717, 1502, 1366, 1132, 1024, 874  $\text{cm}^{-1}$

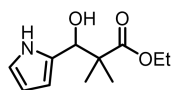

**3x**, 39.0 mg, 92% yield, light yellow oil.

$^1\text{H}$  NMR (600 MHz,  $\text{CDCl}_3$ )  $\delta$  8.66 (s, 1H), 6.73 (dd,  $J = 3.9, 2.5$  Hz, 1H), 6.13 (dd,  $J = 5.8, 2.8$  Hz, 1H), 6.02 (s, 1H), 4.84 (d,  $J = 5.0$  Hz, 1H), 4.18 (q,  $J = 7.1$  Hz, 2H), 3.16 (d,  $J = 5.1$  Hz, 1H), 1.27 (t,  $J = 7.1$  Hz, 3H), 1.23 (s, 3H), 1.12 (s, 3H).

$^{13}\text{C}$  NMR (150 MHz,  $\text{CDCl}_3$ )  $\delta$  178.2, 130.4, 117.2, 107.9, 107.0, 73.8, 61.0, 47.6, 23.0, 20.4, 14.1.

**HRMS (ESI)** calcd for  $[\text{M}+\text{Na}^+]$ :  $\text{C}_{11}\text{H}_{17}\text{NNaO}_3$ ,  $m/z$ : 234.1011, found: 234.1089, Error: 5.2 ppm.

**IR (KBr)**: 3746, 3421, 2980, 1711, 1265, 1148, 1027, 773  $\text{cm}^{-1}$

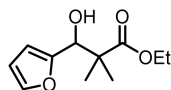

**3y**, 33.8 mg, 80% yield, colorless oil.

**<sup>1</sup>H NMR** (400 MHz, CDCl<sub>3</sub>) δ 7.34 (dd, *J* = 1.8, 0.8 Hz, 1H), 6.33 (dd, *J* = 3.2, 1.8 Hz, 1H), 6.25 (d, *J* = 3.2 Hz, 1H), 4.77 (d, *J* = 7.0 Hz, 1H), 4.20 (m, 2H), 3.45 (d, *J* = 7.1 Hz, 1H), 1.28 (t, *J* = 7.1 Hz, 3H), 1.22 (s, 3H), 1.19 (s, 3H).

**<sup>13</sup>C NMR** (100 MHz, CDCl<sub>3</sub>) δ 177.3, 154.0, 141.7, 110.1, 107.7, 73.4, 60.9, 46.9, 22.9, 20.2, 14.0.

**HRMS (ESI)** calcd for [M+Na<sup>+</sup>]: C<sub>11</sub>H<sub>16</sub>NaO<sub>4</sub>, m/z: 235.0941, found: 235.0937, Error: 1.5 ppm.

**IR (KBr)**: 3481, 2982, 2939, 1720, 1469, 1265, 1175, 1058, 736 cm<sup>-1</sup>

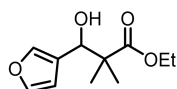

**3z**, 29.0 mg, 70% yield, colorless oil.

**<sup>1</sup>H NMR** (600 MHz, CDCl<sub>3</sub>) δ 7.36 (d, *J* = 2.0 Hz, 2H), 6.35 (s, 1H), 4.79 (d, *J* = 5.3 Hz, 1H), 4.18 (q, *J* = 7.1 Hz, 2H), 3.20 (d, *J* = 5.3 Hz, 1H), 1.27 (t, *J* = 7.1 Hz, 3H), 1.17 (d, *J* = 6.5 Hz, 6H).

**<sup>13</sup>C NMR** (150 MHz, CDCl<sub>3</sub>) δ 177.7, 142.6, 140.2, 124.9, 109.7, 72.3, 60.9, 47.1, 22.7, 19.8, 14.1.

**HRMS (ESI)** calcd for [M+Na<sup>+</sup>]: C<sub>11</sub>H<sub>16</sub>NaO<sub>4</sub>, m/z: 235.0941, found: 235.0935, Error: 2.6 ppm.

**IR (KBr)**: 3445, 2982, 2938, 1718, 1503, 1266, 1133, 1023 cm<sup>-1</sup>

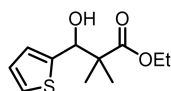

**3aa**, 39.0 mg, 85% yield, colorless oil.

**<sup>1</sup>H NMR** (400 MHz, CDCl<sub>3</sub>) δ 7.24 (dd, *J* = 4.8, 1.4 Hz, 1H), 7.00 – 6.88 (m, 2H), 5.09 (d, *J* = 5.3 Hz, 1H), 4.19 (q, *J* = 7.1 Hz, 2H), 3.47 (d, *J* = 5.3 Hz, 1H), 1.27 (t, *J* = 7.1 Hz, 3H), 1.21 (d, *J* = 7.7 Hz, 6H).

**<sup>13</sup>C NMR** (100 MHz, CDCl<sub>3</sub>) δ 177.5, 143.7, 126.2, 125.6, 124.7, 76.7, 75.6, 61.0, 47.5, 22.8, 19.9, 14.0.

**HRMS (ESI)** calcd for [M+Na<sup>+</sup>]: C<sub>11</sub>H<sub>16</sub>SNaO<sub>3</sub>, m/z: 251.0712, found: 251.0702, Error: 3.9 ppm.

**IR (KBr)**: 3482, 2981, 2937, 1716, 1468, 1262, 1133, 1025, 698 cm<sup>-1</sup>

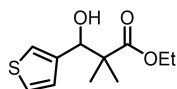

**3ab**, 36.6 mg, 81% yield, colorless oil.

**<sup>1</sup>H NMR** (600 MHz, CDCl<sub>3</sub>) δ 7.27 – 7.24 (m, 1H), 7.16 (d, *J* = 2.7 Hz, 1H), 7.03 (d, *J* = 5.0 Hz, 1H), 4.96 (d, *J* = 4.7 Hz, 1H), 4.17 (q, *J* = 7.1 Hz, 2H), 3.26 (d, *J* = 4.8 Hz, 1H), 1.26 (t, *J* = 7.1 Hz, 3H), 1.16 (s, 3H), 1.14 (s, 3H).

**<sup>13</sup>C NMR** (150 MHz, CDCl<sub>3</sub>) δ 177.7, 141.7, 127.0, 124.9, 122.4, 75.4, 60.8, 47.4, 22.8, 19.5, 14.1.

**HRMS (ESI)** calcd for [M+Na<sup>+</sup>]: C<sub>11</sub>H<sub>16</sub>SNaO<sub>3</sub>, m/z: 251.0712, found: 251.0710, Error: 0.8 ppm.

**IR (KBr)**: 3498, 3106, 2981, 1716, 1469, 1261, 1132, 1051, 788 cm<sup>-1</sup>

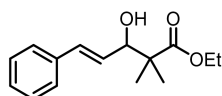

**3ac**, 43.1 mg, 87% yield, colorless oil.

**<sup>1</sup>H NMR** (600 MHz, CDCl<sub>3</sub>) δ 7.38 (d, *J* = 7.4 Hz, 2H), 7.32 (t, *J* = 7.6 Hz, 2H), 7.26 – 7.22 (m, 1H), 6.64 (d, *J* = 15.9 Hz, 1H), 6.22 (dd, *J* = 15.9, 7.0 Hz, 1H), 4.34 (t, *J* = 6.4 Hz, 1H), 4.18 (q, *J* = 7.1 Hz, 2H), 2.86 (d, *J* = 5.8 Hz, 1H), 1.27 (t, *J* = 7.1 Hz, 3H), 1.25 (s, 3H), 1.23 (s, 3H).

**<sup>13</sup>C NMR** (150 MHz, CDCl<sub>3</sub>) δ 177.4, 136.6, 132.8, 128.5, 127.7, 127.5, 126.5, 77.8, 60.8, 47.0, 22.8, 20.1, 14.2.

**HRMS (ESI)** calcd for [M+Na<sup>+</sup>]: C<sub>15</sub>H<sub>20</sub>NaO<sub>3</sub>, m/z: 271.1305, found: 271.1296, Error: 3.3 ppm.

**IR (KBr)**: 3485, 2979, 1718, 1267, 1174, 1071, 1027 cm<sup>-1</sup>

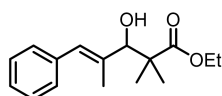

**3ad**, 39.8 mg, 76% yield, colorless oil.

**<sup>1</sup>H NMR** (400 MHz, CDCl<sub>3</sub>) δ 7.32 (dd, *J* = 10.2, 4.6 Hz, 2H), 7.29 – 7.19 (m, 3H), 6.47 (s, 1H), 4.25 (d, *J* = 5.8 Hz, 1H), 4.18 (q, *J* = 7.1 Hz, 2H), 3.42 (d, *J* = 5.9 Hz, 1H), 1.84 (d, *J* = 1.3 Hz, 3H), 1.29 (dd, *J* = 8.7, 5.6 Hz, 6H), 1.23 (s, 3H).

**<sup>13</sup>C NMR** (100 MHz, CDCl<sub>3</sub>) δ 177.8, 137.3, 137.1, 129.1, 129.1, 128.0, 126.5, 83.0, 61.0, 46.6, 24.0, 21.1, 14.7, 14.1.

**HRMS (ESI)** calcd for [M+Na<sup>+</sup>]: C<sub>16</sub>H<sub>22</sub>NaO<sub>3</sub>, m/z: 285.1461, found: 285.1453, Error: 2.9 ppm.

**IR (KBr)**: 3483, 2980, 1717, 1469, 1253, 1132, 1025, 700 cm<sup>-1</sup>

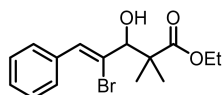

**3ae**, 52.9 mg, 81% yield, colorless oil.

**<sup>1</sup>H NMR** (600 MHz, CDCl<sub>3</sub>) δ 7.57 (d, *J* = 7.6 Hz, 2H), 7.36 (t, *J* = 7.5 Hz, 2H), 7.31 (t, *J* = 7.3 Hz, 1H), 7.01 (s, 1H), 4.35 (d, *J* = 8.2 Hz, 1H), 4.20 (q, *J* = 7.1 Hz, 2H), 4.04 (d, *J* = 8.3 Hz, 1H), 1.39 (s, 3H), 1.30 (t, *J* = 7.1 Hz, 3H), 1.26 (s, 3H).

**<sup>13</sup>C NMR** (150 MHz, CDCl<sub>3</sub>) δ 177.0, 135.0, 131.3, 129.2, 128.2, 128.1, 126.1, 83.1, 61.3, 46.2, 24.7, 21.4, 14.0.

**HRMS (ESI)** calcd for [M+Na<sup>+</sup>]: C<sub>15</sub>H<sub>19</sub>BrNaO<sub>3</sub>, m/z: 349.0410, found: 349.0404, Error: 1.7 ppm.

**IR (KBr)**: 3471, 2980, 1718, 1469, 1259, 1174, 1025, 695 cm<sup>-1</sup>

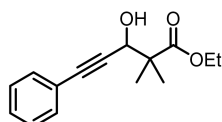

**3af**, 31.2 mg, 81% yield, colorless oil.

**<sup>1</sup>H NMR** (400 MHz, CDCl<sub>3</sub>) δ 7.45 – 7.39 (m, 2H), 7.34 – 7.27 (m, 3H), 4.68 (d, *J* = 6.5 Hz, 1H), 4.21 (q, *J* = 7.1 Hz, 2H), 3.13 (d, *J* = 6.4 Hz, 1H), 1.37 (s, 3H), 1.34 (s, 3H), 1.29 (t, *J* = 7.1 Hz, 3H).



$^{13}\text{C}$  NMR (100 MHz,  $\text{CDCl}_3$ )  $\delta$  176.6, 131.7, 128.5, 128.2, 122.4, 87.2, 85.9, 77.3, 68.9, 61.0, 47.7, 22.7, 20.1, 14.1.

HRMS (ESI) calcd for  $[\text{M}+\text{Na}^+]$ :  $\text{C}_{13}\text{H}_{18}\text{NaO}_3$ ,  $m/z$ : 269.1148, found: 269.1139, Error: 0.3ppm.

IR (KBr): 3460, 2980, 1719, 1490, 1254, 1134, 1051, 757  $\text{cm}^{-1}$

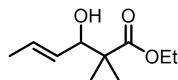

**3ag**, 28.6 mg, 76% yield, colorless oil.

$^1\text{H}$  NMR (400 MHz,  $\text{CDCl}_3$ )  $\delta$  5.79 – 5.67 (m, 1H), 5.48 (m, 1H), 4.19 – 4.13 (m, 2H), 4.12 – 4.06 (m, 1H), 2.70 (d,  $J = 5.8$  Hz, 1H), 1.73 – 1.70 (m, 3H), 1.27 (t,  $J = 7.1$  Hz, 3H), 1.16 (d,  $J = 2.4$  Hz, 6H).

$^{13}\text{C}$  NMR (100 MHz,  $\text{CDCl}_3$ )  $\delta$  177.5, 129.5, 129.1, 77.9, 60.6, 46.6, 22.6, 19.9, 17.8, 14.1.

HRMS (ESI) calcd for  $[\text{M}+\text{Na}^+]$ :  $\text{C}_{10}\text{H}_{18}\text{NaO}_3$ ,  $m/z$ : 209.1148, found: 209.1144, Error: 1.9ppm.

IR (KBr): 3491, 2980, 1720, 1469, 1268, 1139, 1025  $\text{cm}^{-1}$

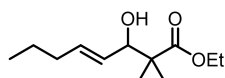

**3ah**, 39.8 mg, 88% yield, colorless oil.

$^1\text{H}$  NMR (600 MHz,  $\text{CDCl}_3$ )  $\delta$  5.69 (dd,  $J = 14.8, 7.3$  Hz, 1H), 5.45 (dd,  $J = 15.3, 7.5$  Hz, 1H), 4.16 (q,  $J = 7.1$  Hz, 2H), 4.11 (d,  $J = 5.7$  Hz, 1H), 2.68 (s, 1H), 2.03 (dt,  $J = 13.3, 6.7$  Hz, 2H), 1.40 (m, 2H), 1.27 (t,  $J = 7.1$  Hz, 3H), 1.17 (t,  $J = 5.3$  Hz, 6H), 0.90 (t,  $J = 7.4$  Hz, 3H).

$^{13}\text{C}$  NMR (150 MHz,  $\text{CDCl}_3$ )  $\delta$  177.5, 134.7, 128.0, 77.9, 60.6, 46.7, 34.4, 22.6, 22.2, 20.0, 14.1, 13.6.

HRMS (ESI) calcd for  $[\text{M}+\text{Na}^+]$ :  $\text{C}_{12}\text{H}_{22}\text{NaO}_3$ ,  $m/z$ : 237.1461, found: 237.1457, Error: 2.0 ppm.

IR (KBr): 3498, 2964, 2934, 1730, 1467, 1265, 1142, 1026  $\text{cm}^{-1}$

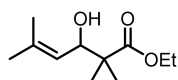

**3ai**, 30.3 mg, 78% yield, colorless oil.

$^1\text{H}$  NMR (400 MHz,  $\text{CDCl}_3$ )  $\delta$  5.21 – 5.15 (m, 1H), 4.41 (dd,  $J = 9.4, 5.2$  Hz, 1H), 4.20 – 4.13 (m, 2H), 2.62 (d,  $J = 5.5$  Hz, 1H), 1.75 (d,  $J = 1.0$  Hz, 3H), 1.71 (d,  $J = 1.2$  Hz, 3H), 1.27 (t,  $J = 7.1$  Hz, 3H), 1.16 (s, 6H).

$^{13}\text{C}$  NMR (100 MHz,  $\text{CDCl}_3$ )  $\delta$  177.7, 137.2, 123.1, 73.2, 60.6, 47.1, 26.0, 22.5, 19.7, 18.5, 14.1.

HRMS (ESI) calcd for  $[\text{M}+\text{Na}^+]$ :  $\text{C}_{11}\text{H}_{20}\text{NaO}_3$ ,  $m/z$ : 223.1305, found: 223.1298, Error: 2.9 ppm.

IR (KBr): 3486, 2979, 2934, 1721, 1469, 1260, 1130, 1026  $\text{cm}^{-1}$

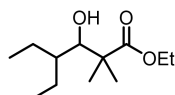

**3aj**, 30.4 mg, 70% yield, colorless oil.

$^1\text{H}$  NMR (600 MHz,  $\text{CDCl}_3$ )  $\delta$  4.15 (q,  $J = 7.1$  Hz, 2H), 3.60 (dd,  $J = 8.2, 2.4$  Hz, 1H), 2.74 (d,  $J = 8.3$  Hz, 1H), 1.46 – 1.33 (m, 3H), 1.27 (dd,  $J = 12.6, 5.4$  Hz, 7H), 1.19 – 1.13 (m, 4H), 0.89 (dt,  $J = 10.3, 7.4$  Hz, 6H).

$^{13}\text{C}$  NMR (150 MHz,  $\text{CDCl}_3$ )  $\delta$  178.1, 78.3, 60.7, 46.2, 42.7, 24.2, 23.9, 22.0, 21.9, 20.7, 14.0, 12.0, 11.6.

HRMS (ESI) calcd for  $[\text{M}+\text{Na}^+]$ :  $\text{C}_{12}\text{H}_{24}\text{NaO}_3$ ,  $m/z$ : 239.1618, found: 239.1606, Error: 4.8 ppm.

IR (KBr): 3505, 2965, 2936, 1725, 1464, 1262, 1140, 1025  $\text{cm}^{-1}$

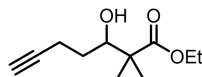

**3ak**, 22.9 mg, 62% yield, colorless oil.

$^1\text{H}$  NMR (400 MHz,  $\text{CDCl}_3$ )  $\delta$  4.17 (q,  $J = 7.1$  Hz, 2H), 3.75 (dd,  $J = 10.7, 4.5$  Hz, 1H), 2.72 (d,  $J = 6.4$  Hz, 1H), 2.50 – 2.29 (m, 2H), 1.97 (t,  $J = 2.6$  Hz, 1H), 1.75 – 1.65 (m, 1H), 1.57 – 1.47 (m, 1H), 1.28 (t,  $J = 7.1$  Hz, 3H), 1.21 (s, 3H), 1.18 (s, 3H).

$^{13}\text{C}$  NMR (100 MHz,  $\text{CDCl}_3$ )  $\delta$  177.6, 84.2, 77.3, 75.4, 68.6, 60.8, 46.7, 30.6, 22.5, 20.3, 15.7, 14.1.

HRMS (ESI) calcd for  $[\text{M}+\text{Na}^+]$ :  $\text{C}_{11}\text{H}_{18}\text{NaO}_3$ ,  $m/z$ : 221.1148, found: 221.1150, Error: -1.0 ppm.

IR (KBr): 3391, 2959, 2922, 1646, 1464, 1260, 1090, 1030  $\text{cm}^{-1}$

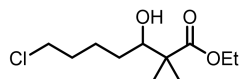

**3al**, 34.6 mg, 73% yield, colorless oil.

$^1\text{H}$  NMR (600 MHz,  $\text{CDCl}_3$ )  $\delta$  4.16 (q,  $J = 7.1$  Hz, 2H), 3.60 (dd,  $J = 9.2, 7.0$  Hz, 1H), 3.57 – 3.52 (m, 2H), 2.58 (d,  $J = 6.8$  Hz, 1H), 1.87 – 1.72 (m, 3H), 1.55 – 1.43 (m, 2H), 1.37 – 1.30 (m, 1H), 1.27 (t,  $J = 7.1$  Hz, 3H), 1.19 (s, 3H), 1.17 (s, 3H).

$^{13}\text{C}$  NMR (150 MHz,  $\text{CDCl}_3$ )  $\delta$  177.7, 76.4, 60.7, 46.9, 44.9, 32.5, 30.9, 24.1, 22.3, 20.4, 14.1.

HRMS (ESI) calcd for  $[\text{M}+\text{Na}^+]$ :  $\text{C}_{11}\text{H}_{21}\text{ClNaO}_3$ ,  $m/z$ : 259.1071, found: 259.1070, Error: 0.6 ppm.

IR (KBr): 3496, 2980, 2943, 1718, 1467, 1264, 1131, 1080, 1024  $\text{cm}^{-1}$

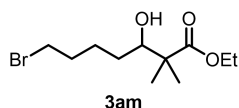

**3am**, 12.0 mg, 26 % yield, colorless oil.

$^1\text{H}$  NMR (400 MHz,  $\text{CDCl}_3$ )  $\delta$  4.16 (q,  $J = 7.1$  Hz, 2H), 3.60 (ddd,  $J = 10.4, 6.9, 1.9$  Hz, 1H), 3.49 – 3.36 (m, 2H), 2.55 (d,  $J = 6.8$  Hz, 1H), 2.00 – 1.82 (m, 2H), 1.80 – 1.67 (m, 1H), 1.55 – 1.40 (m, 2H), 1.37 – 1.30 (m, 1H), 1.27 (t,  $J = 7.1$  Hz, 3H), 1.19 (s, 3H), 1.17 (s, 3H).

$^{13}\text{C}$  NMR (101 MHz,  $\text{CDCl}_3$ )  $\delta$  77.3 (s), 77.0 (s), 76.7 (s), 76.4 (s), 60.7 (s), 46.9 (s), 33.7 (s), 32.7 (s), 30.8 (s), 25.4 (s), 22.4 (s), 20.4 (s), 14.2 (s).

HRMS (ESI) calcd for  $[\text{M}+\text{Na}^+]$ :  $\text{C}_{11}\text{H}_{21}\text{BrNaO}_3$ ,  $m/z$ : 303.0562, found: 303.0566, Error: 1.5 ppm.

IR (KBr): 3444, 2979, 2933, 1715, 1266, 1173  $\text{cm}^{-1}$

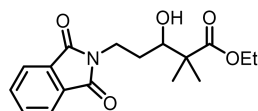

**3an**, 35.5 mg, 56% yield, white solid.

M.p. = 68-71  $^{\circ}\text{C}$

**<sup>1</sup>H NMR** (400 MHz, CDCl<sub>3</sub>) δ 7.92 – 7.80 (m, 2H), 7.76 – 7.70 (m, 2H), 4.12 (q, *J* = 7.1 Hz, 2H), 3.97 – 3.82 (m, 2H), 3.69 (dd, *J* = 10.9, 3.7 Hz, 1H), 3.10 (d, *J* = 6.0 Hz, 1H), 1.82 (m, *J* = 15.6, 8.8, 1.9 Hz, 1H), 1.74 – 1.62 (m, 1H), 1.21 (t, *J* = 7.1 Hz, 3H), 1.17 (s, 3H), 1.15 (s, 3H).

**<sup>13</sup>C NMR** (100 MHz, CDCl<sub>3</sub>) δ 177.1, 168.7, 134.0, 132.0, 123.3, 73.6, 60.6, 46.8, 35.4, 30.5, 21.5, 20.7, 14.0.

**HRMS (ESI)** calcd for [M+Na<sup>+</sup>]: C<sub>17</sub>H<sub>21</sub>NNaO<sub>5</sub>, m/z: 342.1312, found: 342.1280, Error: 0.9 ppm.

**IR (KBr):** 3514, 2980, 1771, 1710, 1396, 1173, 1206, 721 cm<sup>-1</sup>

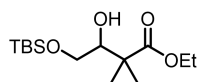

**3ao**, 31.3 mg, 54% yield, colorless oil.

**<sup>1</sup>H NMR** (600 MHz, CDCl<sub>3</sub>) δ 4.08 (q, *J* = 7.1 Hz, 2H), 3.70 – 3.66 (m, 1H), 3.62 (dd, *J* = 10.2, 3.3 Hz, 1H), 3.51 (dd, *J* = 10.2, 7.2 Hz, 1H), 2.89 (d, *J* = 4.7 Hz, 1H), 1.19 (t, *J* = 7.1 Hz, 3H), 1.14 (s, 3H), 1.13 (s, 3H), 0.83 (s, 9H).

**<sup>13</sup>C NMR** (150 MHz, CDCl<sub>3</sub>) δ 176.7, 76.3, 63.8, 60.5, 45.0, 25.8, 21.6, 21.5, 18.3, 14.1.

**HRMS (ESI)** calcd for [M+Na<sup>+</sup>]: C<sub>14</sub>H<sub>30</sub>SiNaO<sub>3</sub>, m/z: 313.1806, found: 313.1796, Error: 3.2 ppm.

**IR (KBr):** 3468, 2955, 2931, 1729, 1637, 1255, 1112, 837 cm<sup>-1</sup>

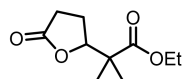

**3ap**, 21.5 mg, 53% yield, colorless oil.

**<sup>1</sup>H NMR** (400 MHz, CDCl<sub>3</sub>) δ 4.71 (t, *J* = 7.7 Hz, 1H), 4.16 (q, *J* = 7.1 Hz, 2H), 2.60 – 2.51 (m, 2H), 2.27 (m, *J* = 13.4, 8.6, 7.5, 6.0 Hz, 1H), 2.09 – 1.93 (m, 1H), 1.29 – 1.24 (m, 6H), 1.20 (d, *J* = 6.0 Hz, 3H).

**<sup>13</sup>C NMR** (100 MHz, CDCl<sub>3</sub>) δ 176.8, 174.8, 83.9, 61.0, 45.7, 28.6, 23.1, 21.3, 19.9, 14.1.

**HRMS (ESI)** calcd for [M+Na<sup>+</sup>]: C<sub>10</sub>H<sub>16</sub>NaO<sub>4</sub>, m/z: 223.0941, found: 223.0940, Error: -1.6 ppm.

**IR (KBr):** 3446, 2983, 1779, 1727, 1471, 1266, 1148, 1007 cm<sup>-1</sup>

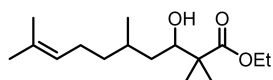

**3aq**, 40.7 mg, 75% yield, colorless oil.

**<sup>1</sup>H NMR** (600 MHz, CDCl<sub>3</sub>) δ 5.11 (dt, *J* = 12.0, 4.1 Hz, 1H), 4.16 (m, 2H), 3.74 – 3.67 (m, 1H), 2.35 (dd, *J* = 15.0, 7.0 Hz, 1H), 2.08 – 1.87 (m, 2H), 1.76 – 1.66 (m, 4H), 1.60 (d, *J* = 2.9 Hz, 3H), 1.40 – 1.19 (m, 6H), 1.17 (dd, *J* = 9.2, 3.0 Hz, 6H), 1.08 (m, *J* = 18.7, 13.9, 10.3, 3.4 Hz, 1H), 0.95 (d, *J* = 6.7 Hz, 2H), 0.90 (d, *J* = 6.6 Hz, 1H).

**<sup>13</sup>C NMR** (150 MHz, CDCl<sub>3</sub>) δ 177.8, 131.2, 124.8, 74.4, 60.6, 47.0, 38.8, 35.7, 29.3, 25.4, 22.1, 20.8, 20.5, 18.8, 17.6, 14.2.

**HRMS (ESI)** calcd for [M+Na<sup>+</sup>]: C<sub>16</sub>H<sub>30</sub>NaO<sub>3</sub>, m/z: 293.2087, found: 293.2078, Error: 3.0 ppm.

**IR (KBr):** 3509, 2967, 2929, 1716, 1466, 1264, 1139, 1026 cm<sup>-1</sup>

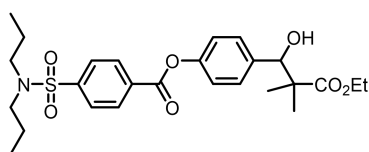

**3ar**, 62.1 mg, 61% yield, white solid.

**M.p.** = 136-139 °C

**<sup>1</sup>H NMR** (600 MHz, CDCl<sub>3</sub>) δ 8.31 (d, *J* = 8.4 Hz, 2H), 7.94 (d, *J* = 8.4 Hz, 2H), 7.40 (d, *J* = 8.5 Hz, 2H), 7.19 (d, *J* = 8.5 Hz, 2H), 4.94 (d, *J* = 4.0 Hz, 1H), 4.20 (q, *J* = 7.1 Hz, 2H), 3.35 – 3.27 (m, 1H), 3.15 – 3.11 (m, 4H), 1.60 – 1.53 (m, 4H), 1.28 (t, *J* = 7.1 Hz, 3H), 1.17 (s, 3H), 1.14 (s, 3H), 0.89 (t, *J* = 7.4 Hz, 6H).

**<sup>13</sup>C NMR** (150 MHz, CDCl<sub>3</sub>) δ 177.7, 163.8, 150.0, 144.9, 138.1, 132.77, 130.7, 128.9, 127.1, 120.7, 78.0, 61.0, 49.9, 47.5, 23.0, 21.9, 19.0, 14.1, 11.1.

**HRMS (ESI)** calcd for [M+Na<sup>+</sup>]: C<sub>26</sub>H<sub>35</sub>NSNaO<sub>7</sub>, m/z: 528.2026, found: 528.2038, Error: -2.3 ppm.

**IR (KBr)**: 3455, 2972, 1737, 1506, 1398, 1073, 1016, cm<sup>-1</sup>

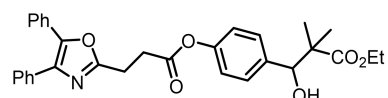

**3as**, 83.0 mg, 86% yield, colorless oil.

**<sup>1</sup>H NMR** (600 MHz, CDCl<sub>3</sub>) δ 7.64 (d, *J* = 7.8 Hz, 2H), 7.58 (d, *J* = 7.7 Hz, 2H), 7.39 – 7.29 (m, 8H), 7.06 (d, *J* = 8.3 Hz, 2H), 4.89 (s, 1H), 4.16 (q, *J* = 7.1 Hz, 2H), 3.29 (t, *J* = 7.3 Hz, 3H), 3.15 (t, *J* = 7.3 Hz, 2H), 1.25 (t, *J* = 7.1 Hz, 3H), 1.13 (s, 3H), 1.09 (s, 3H).

**<sup>13</sup>C NMR** (150 MHz, CDCl<sub>3</sub>) δ 177.7, 170.5, 161.4, 150.0, 145.5, 137.7, 135.1, 132.3, 128.8, 128.7, 128.6, 128.5, 128.5, 128.1, 127.8, 126.5, 120.7, 78.0, 60.9, 60.4, 47.5, 31.2, 23.4, 22.9, 18.9, 14.1, 14.0.

**HRMS (ESI)** calcd for [M+Na<sup>+</sup>]: C<sub>31</sub>H<sub>31</sub>NNaO<sub>6</sub>, m/z: 536.2044, found: 536.2049, Error: -1.0 ppm.

**IR (KBr)**: 3467, 2980, 2936, 1759, 1720, 1201, 1166, 1136 cm<sup>-1</sup>

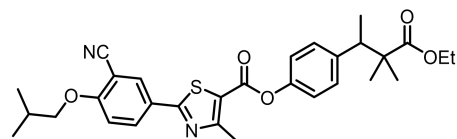

**3at**, 99.8 mg, 86% yield, yellow oil.

**<sup>1</sup>H NMR** (600 MHz, CDCl<sub>3</sub>) δ 7.67 (d, *J* = 8.5 Hz, 2H), 7.47 (d, *J* = 8.5 Hz, 2H), 7.30 (d, *J* = 8.6 Hz, 2H), 7.05 (d, *J* = 2.4 Hz, 1H), 7.02 (d, *J* = 8.6 Hz, 2H), 6.89 (d, *J* = 9.0 Hz, 1H), 6.69 (dd, *J* = 9.0, 2.5 Hz, 1H), 4.88 (s, 1H), 4.17 (q, *J* = 7.1 Hz, 2H), 3.90 (s, 2H), 3.83 (s, 3H), 3.23 (s, 1H), 2.45 (s, 3H), 1.26 (t, *J* = 7.1 Hz, 3H), 1.11 (s, 3H), 1.08 (s, 3H).

**<sup>13</sup>C NMR** (150 MHz, CDCl<sub>3</sub>) δ 177.7, 169.2, 168.3, 156.1, 150.1, 139.3, 137.7, 136.2, 133.8, 131.2, 130.8, 130.5, 129.1, 128.7, 120.6, 115.0, 112.0, 111.8, 101.2, 78.0, 61.0, 55.7, 47.5, 30.5, 23.0, 18.9, 14.1, 13.4.

**HRMS (ESI)** calcd for [M+Na<sup>+</sup>]: C<sub>32</sub>H<sub>32</sub>ClNNaO<sub>7</sub>, m/z: 600.1760, found: 600.1744, Error: 2.6 ppm.

**IR (KBr)**: 3488, 1754, 1684, 1594, 1321, 1165, 926 cm<sup>-1</sup>

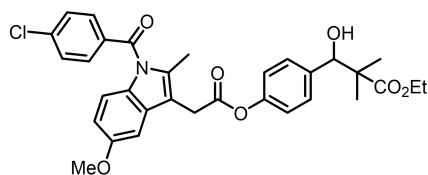

**3au**, 99.8 mg, 86% yield, yellow oil.

**<sup>1</sup>H NMR** (600 MHz, CDCl<sub>3</sub>) δ 7.67 (d, *J* = 8.5 Hz, 2H), 7.47 (d, *J* = 8.5 Hz, 2H), 7.30 (d, *J* = 8.6 Hz, 2H), 7.05 (d, *J* = 2.4 Hz, 1H), 7.02 (d, *J* = 8.6 Hz, 2H), 6.89 (d, *J* = 9.0 Hz, 1H), 6.69 (dd, *J* = 9.0, 2.5 Hz, 1H), 4.88 (s, 1H), 4.17 (q, *J* = 7.1 Hz, 2H), 3.90 (s, 2H), 3.83 (s, 3H), 3.23 (s, 1H), 2.45 (s, 3H), 1.26 (t, *J* = 7.1 Hz, 3H), 1.11 (s, 3H), 1.08 (s, 3H).

**<sup>13</sup>C NMR** (150 MHz, CDCl<sub>3</sub>) δ 177.7, 169.2, 168.3, 156.1, 150.1, 139.3, 137.7, 136.2, 133.8, 131.2, 130.8, 130.5, 129.1, 128.7, 120.6, 115.0, 112.0, 111.8, 101.2, 78.0, 61.0, 55.7, 47.5, 30.5, 23.0, 18.9, 14.1, 13.4.

**HRMS (ESI)** calcd for [M+Na<sup>+</sup>]: C<sub>32</sub>H<sub>32</sub>ClNNaO<sub>7</sub>, m/z: 600.1760, found: 600.1744, Error: 2.6 ppm.

**IR (KBr)**: 3488, 1754, 1684, 1594, 1321, 1165, 926 cm<sup>-1</sup>

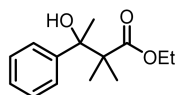

**5a**, 31.4 mg, 67% yield, colorless oil.

**<sup>1</sup>H NMR** (600 MHz, CDCl<sub>3</sub>) δ 7.46 (dd, *J* = 8.3, 0.9 Hz, 2H), 7.31 (dd, *J* = 10.5, 4.8 Hz, 2H), 7.26 – 7.23 (m, 1H), 4.52 (s, 1H), 4.15 (m, 2H), 1.61 (s, 3H), 1.23 (t, *J* = 7.1 Hz, 3H), 1.15 (d, *J* = 4.8 Hz, 6H).

**<sup>13</sup>C NMR** (150 MHz, CDCl<sub>3</sub>) δ 178.6, 143.4, 127.2, 127.2, 126.9, 77.2, 61.1, 50.1, 24.9, 21.8, 21.6, 14.0.

**HRMS (ESI)** calcd for [M+Na<sup>+</sup>]: C<sub>14</sub>H<sub>20</sub>NaO<sub>3</sub>, m/z: 259.1305, found: 259.1294, Error: 4.3 ppm.

**IR (KBr)**: 3453, 2981, 2937, 1691, 1636, 1273, 1146, 1028, 703 cm<sup>-1</sup>

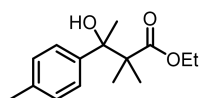

**5b**, 27.5 mg, 55% yield, colorless oil.

**<sup>1</sup>H NMR** (600 MHz, CDCl<sub>3</sub>) δ 7.33 (d, *J* = 8.3 Hz, 2H), 7.11 (d, *J* = 8.0 Hz, 2H), 4.47 (s, 1H), 4.18 – 4.11 (m, 2H), 2.33 (s, 3H), 1.59 (s, 3H), 1.24 (t, *J* = 7.1 Hz, 3H), 1.14 (d, *J* = 2.1 Hz, 6H).

**<sup>13</sup>C NMR** (150 MHz, CDCl<sub>3</sub>) δ 178.6, 140.4, 136.4, 127.9, 127.1, 76.8, 61.1, 50.1, 25.0, 21.8, 21.6, 20.9, 14.0.

**HRMS (ESI)** calcd for [M+Na<sup>+</sup>]: C<sub>15</sub>H<sub>22</sub>NaO<sub>3</sub>, m/z: 273.1461, found: 273.1454, Error: 2.5 ppm.

**IR (KBr)**: 3478, 2981, 2938, 1693, 1468, 1369, 1272, 1146, 1092 cm<sup>-1</sup>

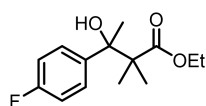

**5c**, 20.7 mg, 41% yield, colorless oil.

**<sup>1</sup>H NMR** (400 MHz, CDCl<sub>3</sub>) δ 7.46 – 7.39 (m, 2H), 7.03 – 6.95 (m, 2H), 4.60 (s, 1H), 4.20 – 4.12 (m, 2H), 1.60 (s, 3H), 1.25 (t, *J* = 7.1 Hz, 3H), 1.13 (d, *J* = 2.0 Hz, 6H).

**<sup>13</sup>C NMR** (101 MHz, CDCl<sub>3</sub>) δ 178.6, 163.1, 160.6, 139.1 (d, *J*<sub>C-F</sub> = 3.1 Hz) 129.0 (d, *J*<sub>C-F</sub> = 7.9 Hz), 114.0, (d, *J*<sub>C-F</sub> = 21.1 Hz), 76.7, 61.1, 50.0, 25.1, 21.7, 21.6, 14.0.

**<sup>19</sup>F NMR** (376 MHz, CDCl<sub>3</sub>) δ -116.50 .

**HRMS (ESI)** calcd for [M+Na<sup>+</sup>]: C<sub>14</sub>H<sub>19</sub>FNaO<sub>3</sub>, m/z: 277.1210, found: 277.1208, Error: 0.8 ppm.

**IR (KBr):** 3465, 2983, 2939, 1692, 1601, 1509, 1146, 1084 cm<sup>-1</sup>

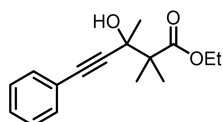

**5d**, 32.8 mg, 63% yield, colorless oil.

**<sup>1</sup>H NMR** (600 MHz, CDCl<sub>3</sub>) δ 7.42 – 7.37 (m, 2H), 7.29 (d, *J* = 3.7 Hz, 3H), 4.56 (s, 1H), 4.22 (q, *J* = 7.1 Hz, 2H), 1.54 (s, 3H), 1.42 (s, 3H), 1.34 (s, 3H), 1.29 (t, *J* = 7.1 Hz, 3H).

**<sup>13</sup>C NMR** (150 MHz, CDCl<sub>3</sub>) δ 177.8, 131.6, 128.2, 128.2, 122.7, 91.4, 83.6, 72.3, 61.2, 50.3, 24.3, 21.9, 20.5, 14.1.

**HRMS (ESI)** calcd for [M+Na<sup>+</sup>]: C<sub>16</sub>H<sub>20</sub>NaO<sub>3</sub>, m/z: 283.1305, found: 283.1296, Error: 3.1 ppm.

**IR (KBr):** 3453, 2985, 1637, 1468, 1386, 1126, 756 cm<sup>-1</sup>

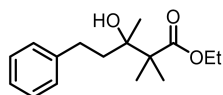

**5e**, 22.2 mg, 42% yield, colorless oil.

**<sup>1</sup>H NMR** (400 MHz, CDCl<sub>3</sub>) δ 7.30 – 7.25 (m, 2H), 7.23 – 7.14 (m, 3H), 4.22 – 4.12 (m, 2H), 3.89 (s, 1H), 2.87 (m, 1H), 2.67 (m, 1H), 1.82 – 1.65 (m, 2H), 1.27 (dd, *J* = 9.9, 4.3 Hz, 6H), 1.21 (d, *J* = 3.1 Hz, 6H).

**<sup>13</sup>C NMR** (100 MHz, CDCl<sub>3</sub>) δ 178.8, 143.0, 128.4, 128.4, 125.7, 75.0, 61.0, 50.2, 39.5, 30.0, 21.4, 21.1, 20.9, 14.1.

**HRMS (ESI)** calcd for [M+Na<sup>+</sup>]: C<sub>16</sub>H<sub>24</sub>NaO<sub>3</sub>, m/z: 287.1618, found: 287.1610, Error: 2.6 ppm.

**IR (KBr):** 3472, 3025, 2981, 1693, 1601, 1271, 1136, 1094, 1021 cm<sup>-1</sup>

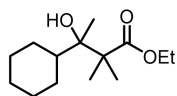

**5f**, 21.6 mg, 50% yield, colorless oil.

**<sup>1</sup>H NMR** (400 MHz, CDCl<sub>3</sub>) δ 4.16 (q, *J* = 7.1 Hz, 2H), 3.35 (s, 1H), 1.72 – 1.60 (m, 3H), 1.51 (d, *J* = 11.4 Hz, 4H), 1.44 – 1.35 (m, 2H), 1.28 (t, *J* = 7.1 Hz, 3H), 1.23 (s, 1H), 1.21 (s, 6H).

**<sup>13</sup>C NMR** (100 MHz, CDCl<sub>3</sub>) δ 178.6, 74.0, 60.8, 50.0, 31.6, 25.8, 21.6, 20.8, 14.1.

**HRMS (ESI)** calcd for [M+Na<sup>+</sup>]: C<sub>12</sub>H<sub>22</sub>NaO<sub>3</sub>, m/z: 237.1461, found: 237.1457, Error: -4.2 ppm.

**IR (KBr):** 3484, 2933, 2853, 1720, 1695, 1266, 1173, 1133, 1022 cm<sup>-1</sup>

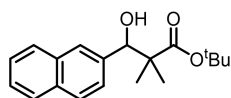

**6a**, 54.1 mg, 90% yield, white solid.

**M.p.** = 63 - 66 °C.

**<sup>1</sup>H NMR** (600 MHz, CDCl<sub>3</sub>) δ 7.84 – 7.70 (m, 4H), 7.52 – 7.39 (m, 3H), 4.98 (d, *J* = 4.2 Hz, 1H), 3.63 (t, *J* = 3.9 Hz, 1H), 1.46 (s, 9H), 1.12 (d, *J* = 3.3 Hz, 6H).

**<sup>13</sup>C NMR** (150 MHz, CDCl<sub>3</sub>) δ 177.2, 137.9, 132.9, 132.8, 128.0, 127.5, 127.1, 126.7, 125.9, 125.9, 125.8, 81.1, 78.9, 48.0, 27.9, 23.4, 19.4.

**HRMS (ESI)** calcd for [M+Na<sup>+</sup>]: C<sub>19</sub>H<sub>24</sub>NaO<sub>3</sub>, m/z: 323.1618, found: 323.1610, Error: 2.5 ppm.

**IR (KBr)**: 3467, 3057, 2977, 2933, 1711, 1390, 1254, 1130, 1053 cm<sup>-1</sup>

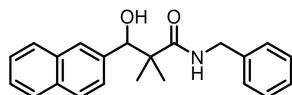

**6b**, 51.2 mg, 77% yield, colorless oil.

**<sup>1</sup>H NMR** (600 MHz, CDCl<sub>3</sub>) δ 7.83 – 7.76 (m, 2H), 7.76 – 7.69 (m, 2H), 7.51 – 7.44 (m, 2H), 7.39 (dd, *J* = 8.5, 1.7 Hz, 1H), 7.24 (dd, *J* = 6.7, 3.9 Hz, 3H), 7.13 (dd, *J* = 6.5, 2.9 Hz, 2H), 6.24 (s, 1H), 4.83 (s, 1H), 4.64 (s, 1H), 4.42 (m, 2H), 1.30 (s, 3H), 1.13 (s, 3H).

**<sup>13</sup>C NMR** (150 MHz, CDCl<sub>3</sub>) δ 177.6, 138.3, 137.8, 133.0, 132.9, 128.7, 128.1, 127.6, 127.5, 127.5, 127.4, 126.6, 126.0, 125.9, 125.6, 80.2, 46.4, 43.5, 24.5, 20.8.

**HRMS (ESI)** calcd for [M+Na<sup>+</sup>]: C<sub>22</sub>H<sub>23</sub>NNaO<sub>2</sub>, m/z: 356.1621, found: 356.1624, Error: -0.7 ppm.

**IR (KBr)**: 3347, 3059, 2972, 1638, 1533, 1050, 785 cm<sup>-1</sup>

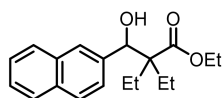

**6c**, 31.7 mg, 53% yield, colorless oil.

**<sup>1</sup>H NMR** (600 MHz, CDCl<sub>3</sub>) δ 7.94 – 7.74 (m, 3H), 7.71 (s, 1H), 7.45 (dt, *J* = 6.8 Hz, 2H), 7.40 (d, *J* = 8.5 Hz, 1H), 5.03 (d, *J* = 6.0 Hz, 1H), 4.24 – 4.12 (m, 2H), 3.94 (dd, *J* = 5.9, 2.8 Hz, 1H), 1.85 – 1.77 (m, 2H), 1.71 (m, 1H), 1.44 (m, 1H), 1.21 (t, *J* = 7.1 Hz, 3H), 0.95 (q, *J* = 7.8 Hz, 6H).

**<sup>13</sup>C NMR** (150 MHz, CDCl<sub>3</sub>) δ 176.9, 138.2, 132.4, 132.9, 128.0, 127.5, 127.4, 126.3, 126.0, 125.8, 125.2, 76.8, 60.7, 54.8, 25.8, 23.7, 14.1, 9.1, 8.8.

**HRMS (ESI)** calcd for [M+Na<sup>+</sup>]: C<sub>19</sub>H<sub>24</sub>NaO<sub>3</sub>, m/z: 323.1618, found: 323.1603, Error: 4.5 ppm.

**IR (KBr)**: 3493, 3057, 2972, 2881, 1715, 1459, 1227, 1123, 1031 cm<sup>-1</sup>

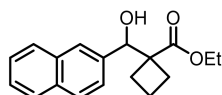

**6d**, 38.6 mg, 65% yield, colorless oil.

**<sup>1</sup>H NMR** (600 MHz, CDCl<sub>3</sub>) δ 7.84 – 7.76 (m, 3H), 7.75 (s, 1H), 7.51 – 7.42 (m, 3H), 5.07 (d, *J* = 6.2 Hz, 1H), 4.18 – 4.06 (m, 2H), 3.42 (d, *J* = 6.7 Hz, 1H), 2.52 – 2.43 (m, 2H), 2.38 – 2.29 (m, 2H), 1.89 (m, 1H), 1.76 – 1.68 (m, 1H), 1.15 (t, *J* = 7.1 Hz, 3H).

**<sup>13</sup>C NMR** (150 MHz, CDCl<sub>3</sub>) δ 176.3, 138.3, 133.0, 132.9, 128.0, 127.7, 127.6, 126.0, 125.8, 125.5, 124.7, 77.2, 60.9, 52.6, 28.0, 26.8, 15.7, 14.0.

**HRMS (ESI)** calcd for [M+Na<sup>+</sup>]: C<sub>18</sub>H<sub>20</sub>NaO<sub>3</sub>, m/z: 307.1305, found: 307.1299, Error: 2.0 ppm.

**IR (KBr)**: 3472, 2980, 2948, 1713, 1205, 1155, 1102, 748 cm<sup>-1</sup>

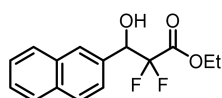

**6e**, 38.6 mg, 65% yield, colorless oil.

**<sup>1</sup>H NMR** (600 MHz, CDCl<sub>3</sub>) δ 7.89 (s, 1H), 7.83 (dd, *J* = 11.6, 5.8 Hz, 3H), 7.58 – 7.45 (m, 3H), 5.32 (s, 1H), 4.28 (q, *J* = 7.1 Hz, 2H), 2.94 (d, *J* = 4.5 Hz, 1H), 1.24 (t, *J* = 7.2 Hz, 3H).

**<sup>13</sup>C NMR** (150 MHz, CDCl<sub>3</sub>) δ 163.5 (t, *J*<sub>C-F</sub> = 31.6 Hz), 133.6, 132.9, 131.8, 128.2, 128.2, 127.7, 127.4, 126.7, 126.4, 124.8, 113.9, (dd, *J*<sub>C-F</sub> = 252.7, 252.8 Hz), 73.9, (dd, *J*<sub>C-F</sub> = 24.2, 24.6 Hz), 63.2, 13.8.

**<sup>19</sup>F NMR** (376 MHz, CDCl<sub>3</sub>) δ -113.4, -200.0.

**HRMS (ESI)** calcd for [M+Na<sup>+</sup>]: C<sub>15</sub>H<sub>14</sub>F<sub>2</sub>NaO<sub>3</sub>, *m/z*: 303.0803, found: 303.0798, Error: 1.7 ppm.

**IR (KBr)**: 3476, 1757, 1306, 1073, 858, 798, 479 cm<sup>-1</sup>

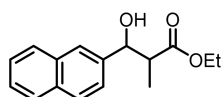

**6f**, 55.8 mg, 90% yield, colorless oil.

**Major:**

**<sup>1</sup>H NMR** (400 MHz, CDCl<sub>3</sub>) δ 7.82 (dd, *J* = 8.8, 6.1 Hz, 4H), 7.51 – 7.40 (m, 3H), 5.27 (d, *J* = 3.5 Hz, 1H), 4.14 (q, *J* = 7.1 Hz, 2H), 3.17 (s, 1H), 2.88 (m, 1H), 1.20 (t, *J* = 7.1 Hz, 3H), 1.14 (d, *J* = 7.2 Hz, 3H).

**<sup>13</sup>C NMR** (100 MHz, CDCl<sub>3</sub>) δ 175.9, 138.8, 133.2, 132.8, 128.0, 127.9, 127.6, 126.1, 125.8, 124.9, 124.0, 73.6, 60.8, 46.2, 14.1, 10.7.

**Minor:**

**<sup>1</sup>H NMR** (400 MHz, CDCl<sub>3</sub>) δ 7.84 (dd, *J* = 8.8, 4.7 Hz, 3H), 7.78 (s, 1H), 7.53 – 7.43 (m, 3H), 4.92 (d, *J* = 6.7 Hz, 1H), 4.19 (q, *J* = 7.1 Hz, 2H), 3.18 (d, *J* = 3.3 Hz, 1H), 2.91 (m, 1H), 1.25 (t, *J* = 7.1 Hz, 3H), 1.05 (d, *J* = 7.2 Hz, 3H).

**<sup>13</sup>C NMR** (100 MHz, CDCl<sub>3</sub>) δ 175.9, 139.0, 133.2, 133.1, 128.4, 128.0, 127.7, 126.2, 126.0, 125.9, 124.2, 76.5, 60.8, 47.0, 14.6, 14.1.

**HRMS (ESI)** calcd for [M+Na]<sup>+</sup>C<sub>16</sub>H<sub>18</sub>NaO<sub>3</sub>, *m/z*: 281.1148, found: 281.1145, Error 1.1 ppm.

**IR (KBr)**: 3467, 2980, 2937, 1715, 1260, 1186, 1030, 818, 478 cm<sup>-1</sup>

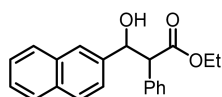

**6g**, 43.8 mg, 68% yield, colorless oil.

**Major:** **<sup>1</sup>H NMR** (400 MHz, CDCl<sub>3</sub>) δ 7.80 (m, 4H), 7.46 (m, 3H), 7.40 – 7.28 (m, 5H), 5.46 (d, *J* = 7.4 Hz, 1H), 4.05 – 3.89 (m, 3H), 2.72 (d, *J* = 1.5 Hz, 1H), 0.99 (t, *J* = 7.1 Hz, 3H).

**<sup>13</sup>C NMR** (100 MHz, CDCl<sub>3</sub>) δ 172.4, 138.2, 134.7, 133.1, 133.1, 129.2, 128.6, 128.1, 128.0, 127.9, 127.6, 126.0, 126.0, 124.5, 75.2, 61.0, 59.6, 13.8.

**Minor:** **<sup>1</sup>H NMR** (400 MHz, CDCl<sub>3</sub>) δ 7.76 (dd, *J* = 8.2, 4.9 Hz, 1H), 7.72 – 7.65 (m, 2H), 7.57 (s, 1H), 7.45 – 7.36 (m, 2H), 7.24 (dd, *J* = 8.5, 1.7 Hz, 1H), 7.21 – 6.94 (m, 5H), 5.34 (dd, *J* = 9.0, 2.5



Hz, 1H), 4.29 – 4.10 (m, 2H), 3.98 (d,  $J = 9.1$  Hz, 1H), 3.32 (d,  $J = 3.5$  Hz, 1H), 1.22 (t,  $J = 7.1$  Hz, 3H).

$^{13}\text{C}$  NMR (100 MHz,  $\text{CDCl}_3$ )  $\delta$  173.5, 138.3, 135.3, 133.0, 132.9, 128.5, 128.5, 128.0, 127.8, 127.6, 127.5, 126.0, 125.9, 125.8, 124.4, 61.3, 59.8, 14.0.

HRMS (ESI) calcd for  $[\text{M}+\text{Na}^+]$ :  $\text{C}_{21}\text{H}_{20}\text{NaO}_3$ ,  $m/z$ : 343.1305, found: 343.1299, Error: 1.7 ppm.

IR (KBr): 3449, 2926, 1727, 1600, 1152, 1028, 859, 747  $\text{cm}^{-1}$

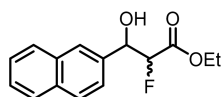

**6h**, 34.4 mg, 66% yield, yellow oil.

$^1\text{H}$  NMR (600 MHz,  $\text{CDCl}_3$ )  $\delta$  7.83 (m, 4.0 Hz, 10H), 7.53 – 7.45 (m, 7H), 5.34 – 5.25 (m, 3H), 5.16 (dd,  $J = 15.3, 4.3$  Hz, 1H), 5.08 (dd,  $J = 15.0, 4.3$  Hz, 1H), 4.25 – 4.11 (m, 6H), 3.09 (s, 1H), 2.94 (d,  $J = 4.7$  Hz, 1H), 1.17 (t,  $J = 7.2$  Hz, 3H), 1.13 (t,  $J = 7.1$  Hz, 4H).

$^{13}\text{C}$  NMR (150 MHz,  $\text{CDCl}_3$ )  $\delta$  167.9, 167.8 (d,  $J_{\text{C-F}} = 22.9$  Hz), 135.4, 135.1, 133.4 (d,  $J_{\text{C-F}} = 10.7$  Hz), 133.1 (d,  $J = 4.5$  Hz), 128.5, 128.3, 128.1 (d,  $J_{\text{C-F}} = 3.2$  Hz), 127.7 (s), 126.55 – 126.2 (m), 125.8, 124.3, 124.1, 92.2, 91.7, 90.9, 90.4, 74.1, 74.0 (d,  $J_{\text{C-F}} = 12.6$  Hz), 73.8, 61.9 (d,  $J_{\text{C-F}} = 18.4$  Hz), 14.0 (d,  $J_{\text{C-F}} = 1.9$  Hz).

$^{19}\text{F}$  NMR (376 MHz,  $\text{CDCl}_3$ )  $\delta$  -197.15, -202.72.

HRMS (ESI) calcd for  $[\text{M}+\text{Na}^+]$ :  $\text{C}_{15}\text{H}_{15}\text{FNaO}_3$ ,  $m/z$ : 285.0897, found: 285.0898, Error: -0.3 ppm.

IR (KBr): 3448, 2923, 2852, 1742, 1627, 1097, 1062, 749  $\text{cm}^{-1}$

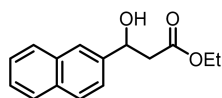

**6i**, 24.7 mg, 51% yield, colorless oil.

$^1\text{H}$  NMR (400 MHz,  $\text{CDCl}_3$ )  $\delta$  7.88 – 7.76 (m, 4H), 7.48 (dt,  $J = 5.2, 1.8$  Hz, 3H), 5.33 – 5.26 (m, 1H), 4.19 (q,  $J = 7.1$  Hz, 2H), 3.44 (d,  $J = 2.8$  Hz, 1H), 2.88 – 2.75 (m, 2H), 1.26 (t,  $J = 7.1$  Hz, 3H).

$^{13}\text{C}$  NMR (100 MHz,  $\text{CDCl}_3$ )  $\delta$  172.4, 139.9, 133.2, 133.0, 128.3, 128.0, 127.7, 126.2, 126.0, 124.4, 123.7, 70.4, 60.9, 43.3, 14.1.

HRMS (ESI) calcd for  $[\text{M}+\text{Na}^+]$ :  $\text{C}_{15}\text{H}_{16}\text{NaO}_3$ ,  $m/z$ : 267.0992, found: 267.0992, Error: 0.0 ppm.

IR (KBr): 3446, 2980, 2925, 1724, 1633, 1173, 1036, 747  $\text{cm}^{-1}$

## 4. Mechanistic Studies

### 4.1 Radical capture experiment

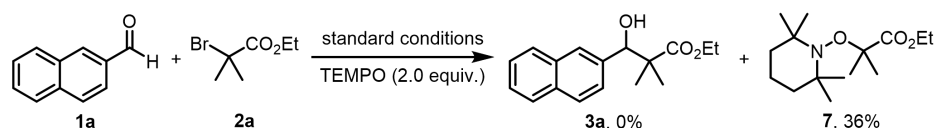

Under an argon atmosphere, a 10 mL Schlenk tube was charged with **1a** (0.2 mmol), **2a** (0.5 mmol),  $\text{FeBr}_2$  (0.02 mmol, 10 mol%),  $\text{Co}(\text{acac})_3$  (0.02 mmol, 10 mol%), HE (0.28 mmol, 1.4 equiv.),  $i\text{Pr}_2\text{NEt}$  (0.4 mmol, 2.0 equiv.), TEMPO (0.4 mmol, 2.0 equiv.), and ethyl acetate (2 mL).

Then, the reaction mixture was stirred at room temperature for 24 h under irradiation of 40 W 390 nm Kessil. The resulting mixture was concentrated in vacuum, and the residue was purified by flash column chromatography on silica gel to afford the desired product **7**.

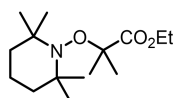

**7**, 20.2 mg, 36% yield, colorless oil.

<sup>1</sup>H NMR (400 MHz, CDCl<sub>3</sub>) δ 4.17 (q, *J* = 7.1 Hz, 2H), 1.55 – 1.43 (m, 10H), 1.41 (t, *J* = 8.3 Hz, 1H), 1.28 (m, 4H), 1.15 (s, 6H), 1.00 (s, 6H).

<sup>13</sup>C NMR (100 MHz, CDCl<sub>3</sub>) δ 176.1, 81.0, 77.3, 60.5, 59.5, 40.6, 33.4, 24.4, 20.4, 17.0, 14.1.

HRMS (ESI) calcd for [M+H<sup>+</sup>]: C<sub>15</sub>H<sub>30</sub>NO<sub>3</sub>, *m/z*: 271.2220, found: 271.2208, Error: 4.4 ppm.

IR (KBr): 3444, 2976, 2933, 1733, 1635, 1359, 1160, 1136, 1028 cm<sup>-1</sup>

#### 4.2 Radical clock experiment

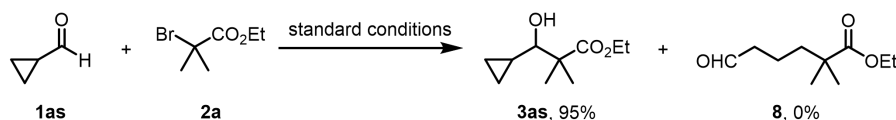

Under an argon atmosphere, a 10 mL Schlenk tube was charged with **1as** (0.2 mmol), **2a** (0.5 mmol), FeBr<sub>2</sub> (0.02 mmol, 10 mol%), Co(acac)<sub>3</sub> (0.02 mmol, 10 mol%), HE (0.28 mmol, 1.4 equiv.), <sup>i</sup>Pr<sub>2</sub>NEt (0.4 mmol, 2.0 equiv.), and ethyl acetate (2 mL). Then, the reaction mixture was stirred at room temperature for 24 h under irradiation of 40 W 390 nm Kessil. The resulting mixture was concentrated in vacuum, and the residue was purified by flash column chromatography on silica gel to afford the desired product **3as**.

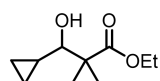

**3as**, 35.4 mg, 95% yield, colorless oil.

<sup>1</sup>H NMR (600 MHz, CDCl<sub>3</sub>) δ 4.19 – 4.13 (m, 2H), 3.00 (dd, *J* = 8.6, 4.9 Hz, 1H), 2.44 (d, *J* = 5.2 Hz, 1H), 1.28 (t, *J* = 3.5 Hz, 6H), 1.26 (s, 3H), 0.93 (m, 1H), 0.57 (m, 1H), 0.50 (m, 1H), 0.36 – 0.29 (m, 2H).

<sup>13</sup>C NMR (150 MHz, CDCl<sub>3</sub>) δ 177.6, 80.8, 60.6, 47.7, 22.6, 20.6, 14.1, 13.1, 4.4, 1.6.

HRMS (ESI) calcd for [M+Na<sup>+</sup>]: C<sub>10</sub>H<sub>18</sub>NaO<sub>3</sub>, *m/z*: 209.1148, found: 209.1153, Error -2.3 ppm.

IR (KBr): 3374, 1637, 1112, 674 cm<sup>-1</sup>

#### 4.3 Secondary isotope effect<sup>1</sup>

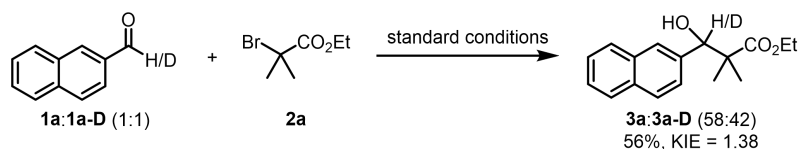

Under an argon atmosphere, a 10 mL Schlenk tube was charged with **1a** (0.1 mmol), **1a-D** (0.1 mmol), **2a** (0.5 mmol), FeBr<sub>2</sub> (0.02 mmol, 10 mol%), Co(acac)<sub>3</sub> (0.02 mmol, 10 mol%), HE (0.28

mmol, 1.4 equiv.),  $i\text{Pr}_2\text{NEt}$  (0.4 mmol, 2.0 equiv.), and ethyl acetate (2 mL). Then, the reaction mixture was stirred at room temperature for 24 h under irradiation of 40 W 390 nm Kessil. The resulting mixture was concentrated in vacuum, and the residue was purified by flash column chromatography on silica gel to afford the desired product **3a** and **3a-D**.

#### 4.4 Switching light experiment

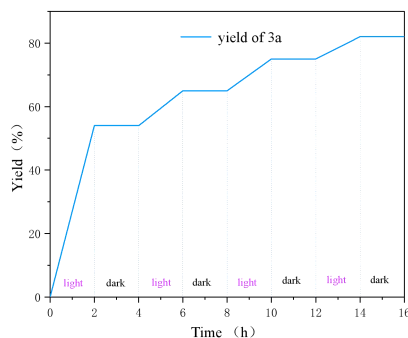

Figure S1 Switching light experiment.

#### 4.5 Stern-Volmer fluorescence quenching experiment<sup>2</sup>

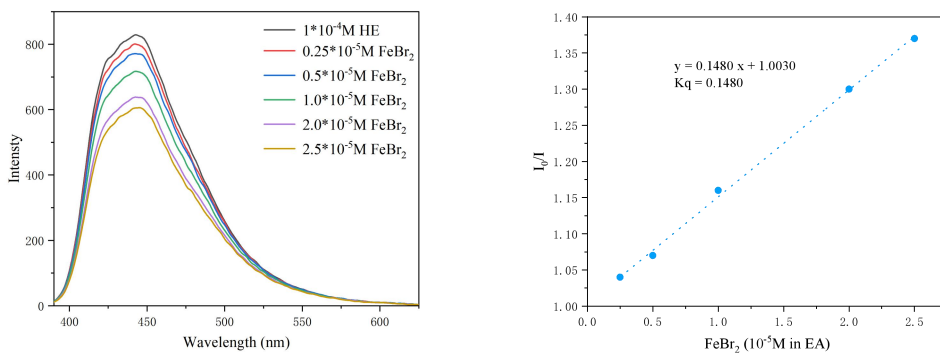

Figure S2 The excited Hantzsch ester quenched by  $\text{FeBr}_2$  in ethyl acetate.

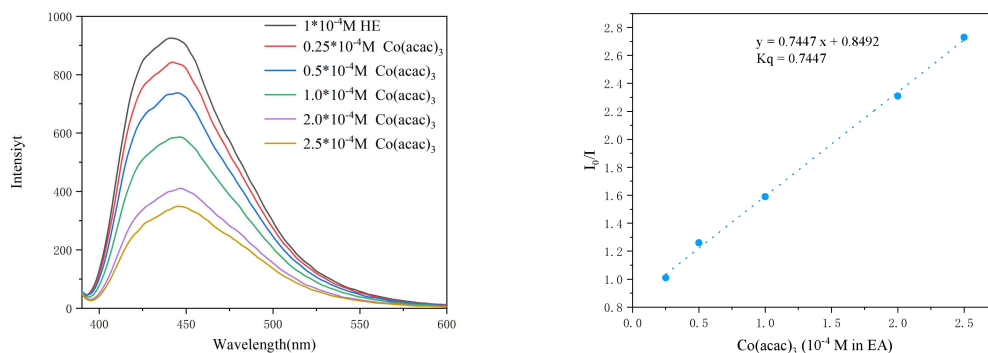

Figure S3 The excited Hantzsch ester quenched by  $\text{Co}(\text{acac})_3$  in ethyl acetate.

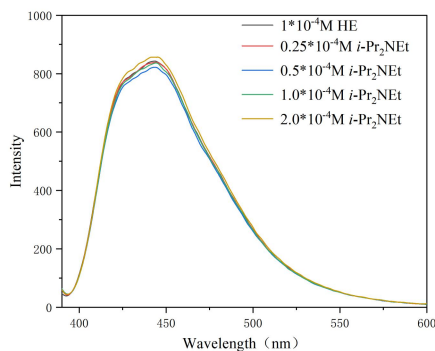

**Figure S4** The excited Hantzsch ester not quenched by *i*-Pr<sub>2</sub>NEt in ethyl acetate.

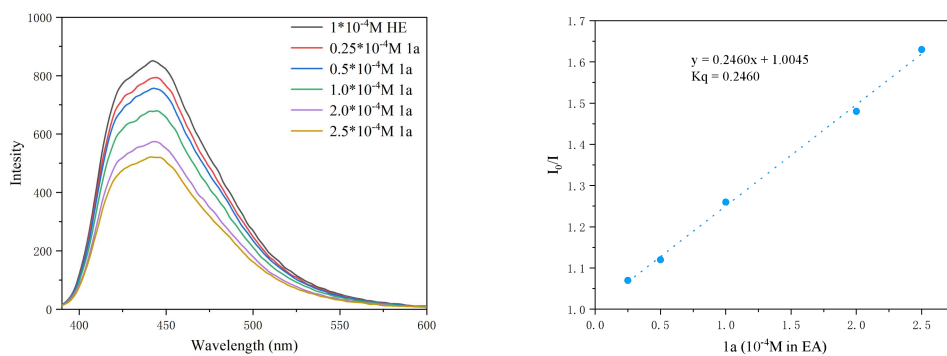

**Figure S5** The excited Hantzsch ester quenched by aldehyde **1a** in ethyl acetate.

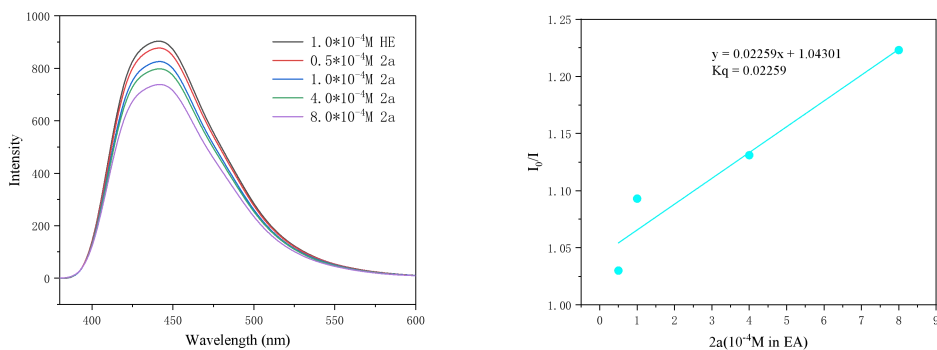

**Figure S6** The excited Hantzsch ester quenched by  $\alpha$ -bromoester **2a** in ethyl acetate.

**Table S6** Quenching of the excited Hantzsch ester with each component of the reaction

| entry | component             | K <sub>q</sub> |
|-------|-----------------------|----------------|
| 1     | FeBr <sub>2</sub>     | 0.1480         |
| 2     | Co(acac) <sub>3</sub> | 0.7447         |
| 3     | <b>1a</b>             | 0.2460         |
| 4     | <b>2a</b>             | 0.0226         |

#### 4.6 Cyclic Voltammetry Data

Cyclic voltammetry experiments were performed in anhydrous degassed  $\text{CH}_3\text{CN}$  with analyte (1 mM) and  $[(n\text{-Bu})_4\text{N}]^+[\text{PF}_6]^-$  (100 mM) using a glassy carbon working electrode, platinum wire counter electrode, a saturated calomel electrode as reference electrode with a scan rate of 50 mV/s. Data were analyzed by subtracting the electrolyte solution background current prior to identifying the maximum current ( $C_p$ ).

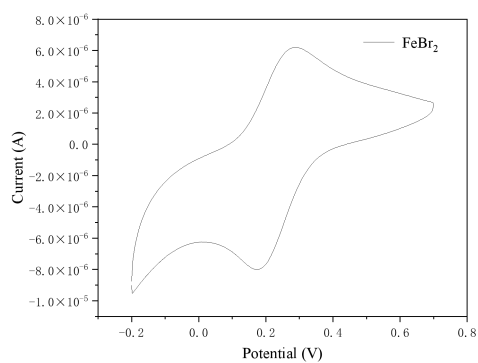

**Figure S7** Oxidation potential of  $\text{FeBr}_2$

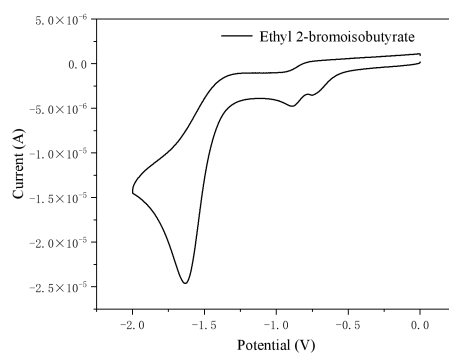

**Figure S8** Reduction potential of  $\alpha$ -bromo ethyl isobutyrate **2a**

## 5. References

1. X. Jiang, H. Jiang, Q. Yang, Y. Cheng, L.-Q. Lu, J. A. Tunge and W.-J. Xiao, *J. Am. Chem. Soc.*, 2022, **144**, 8347-8354.
2. K. Cui, Y.-L. Li, G. Li and J.-B. Xia, *J. Am. Chem. Soc.*, 2022, **144**, 23001-23009.

## 6. Copies of NMR Spectra

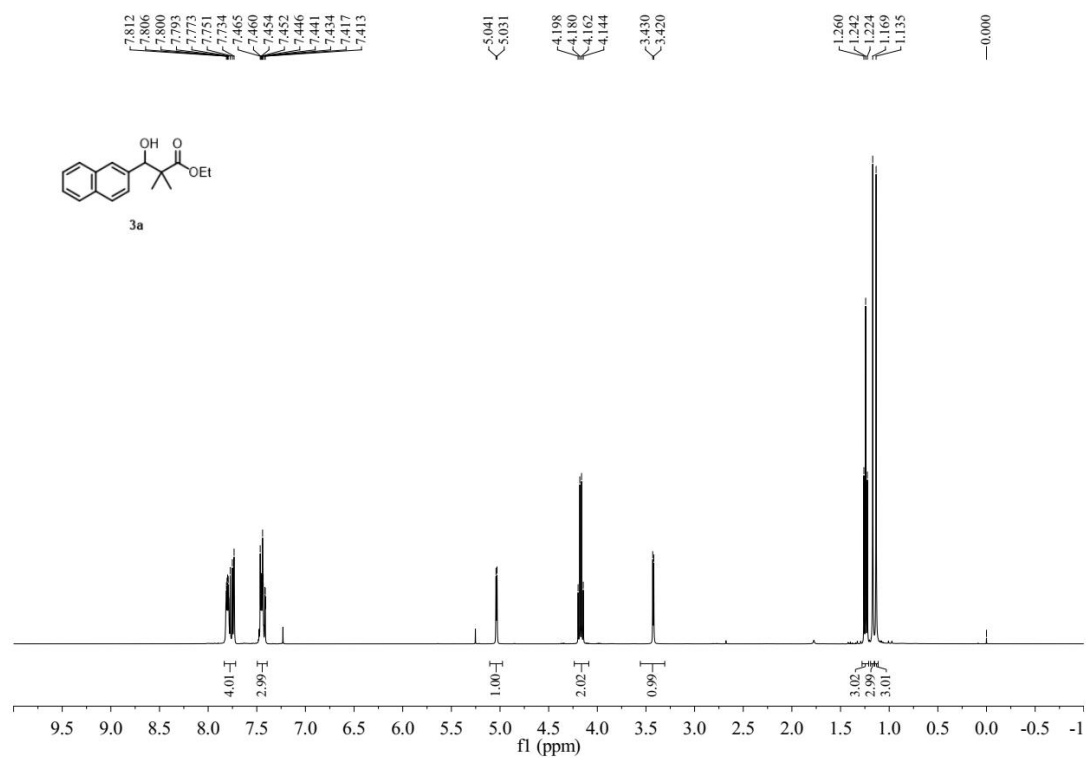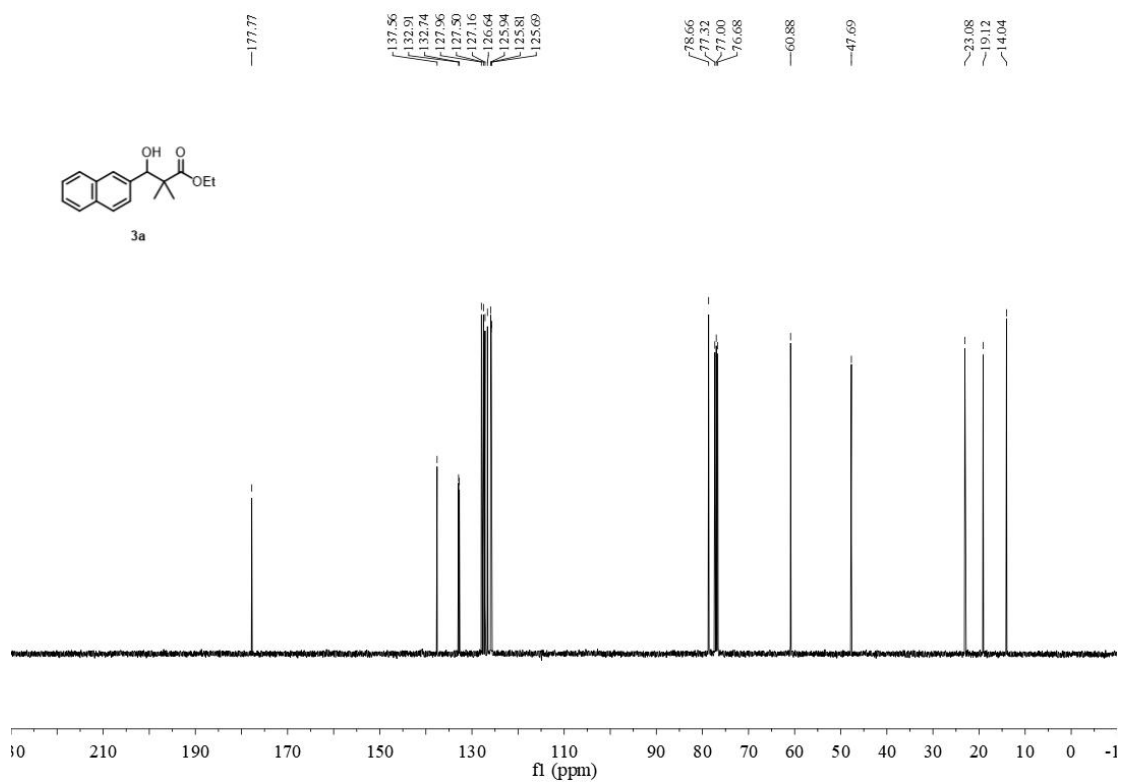

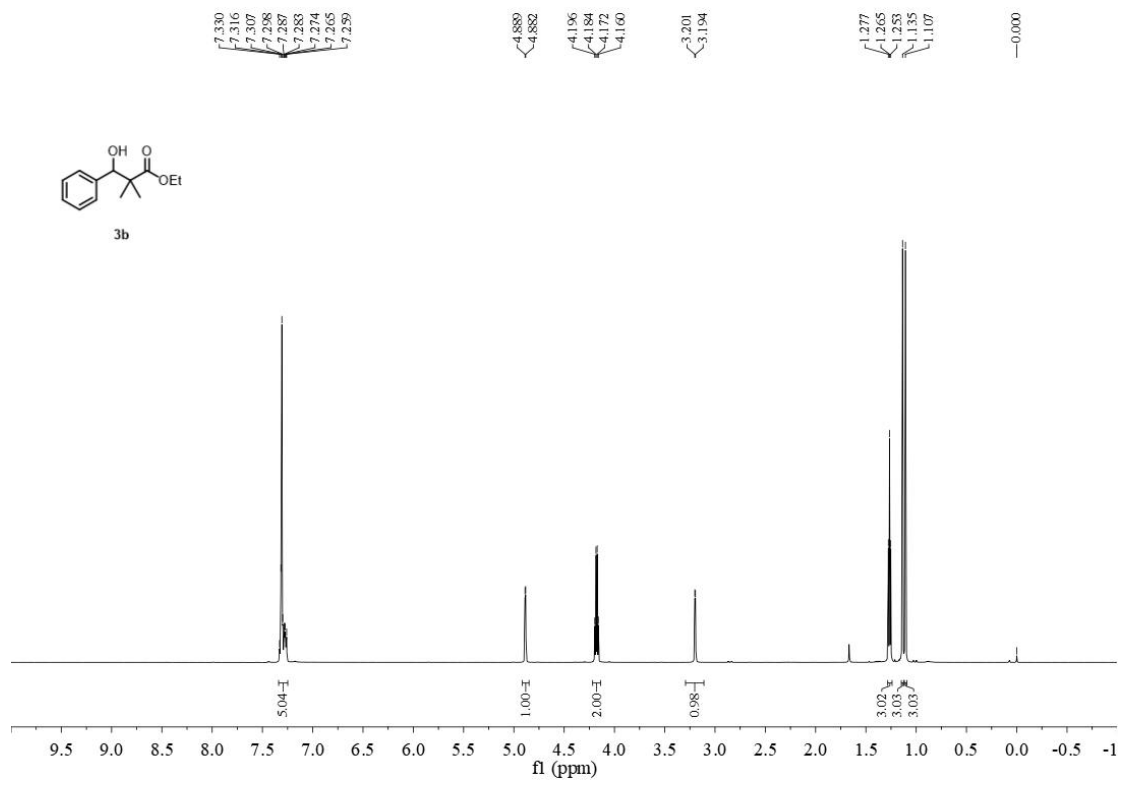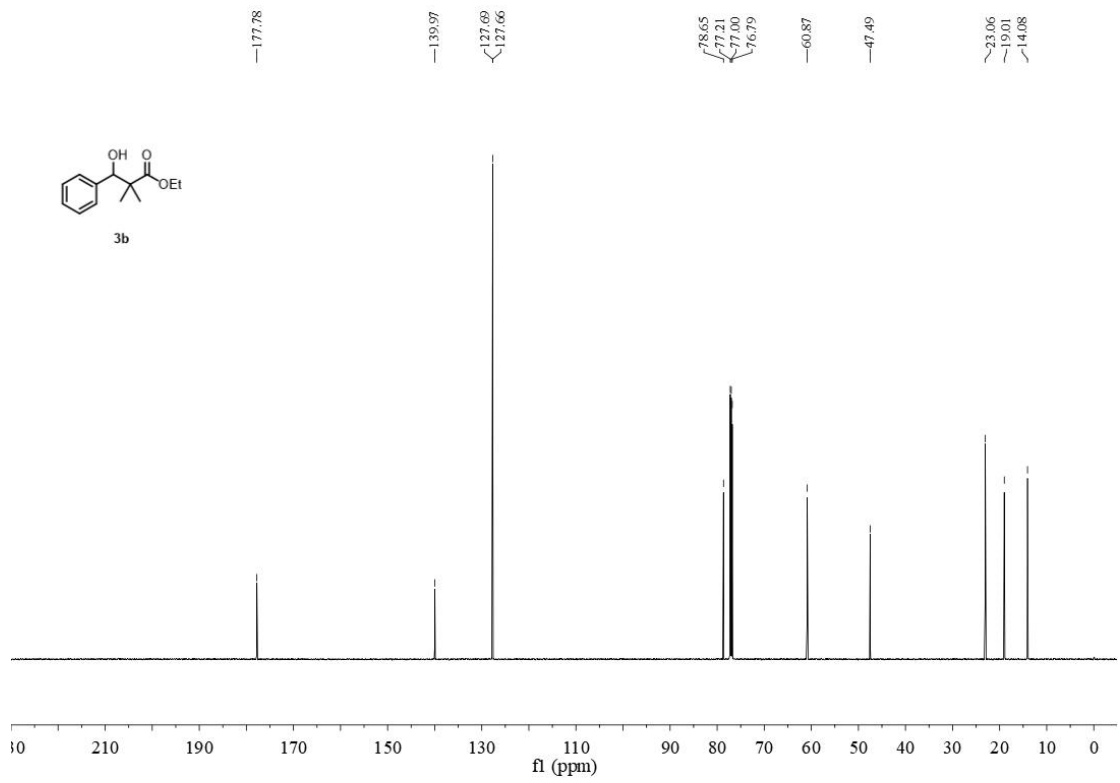



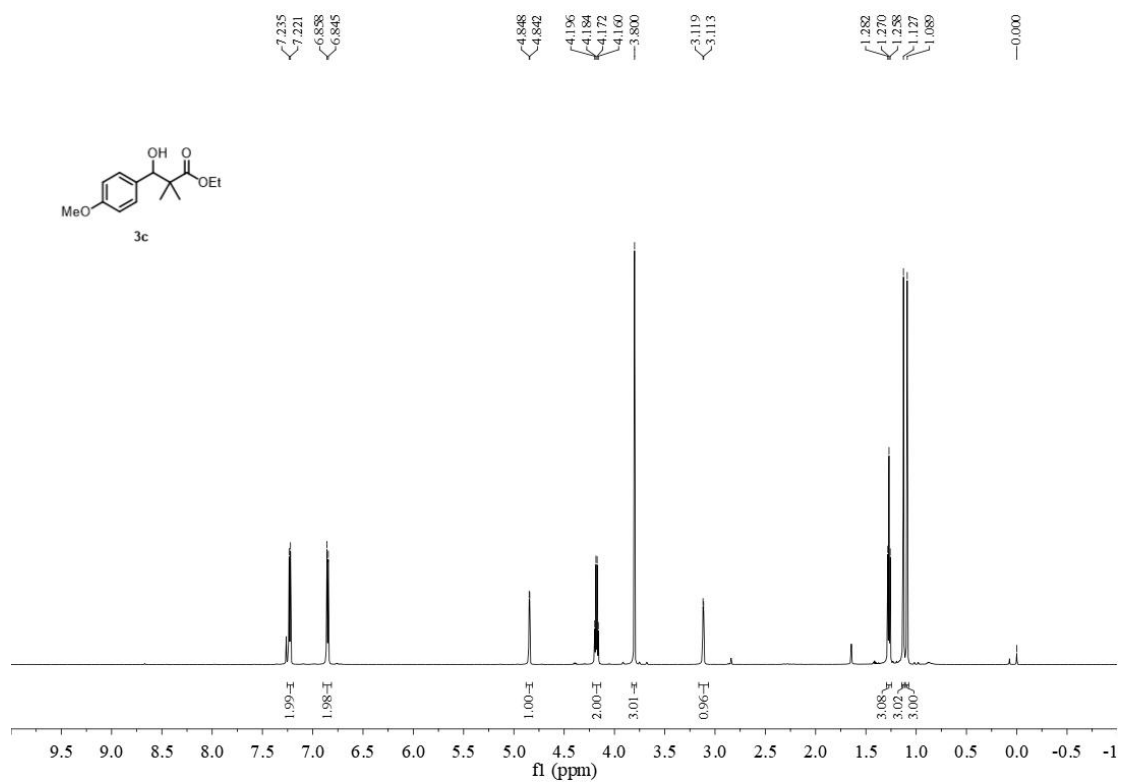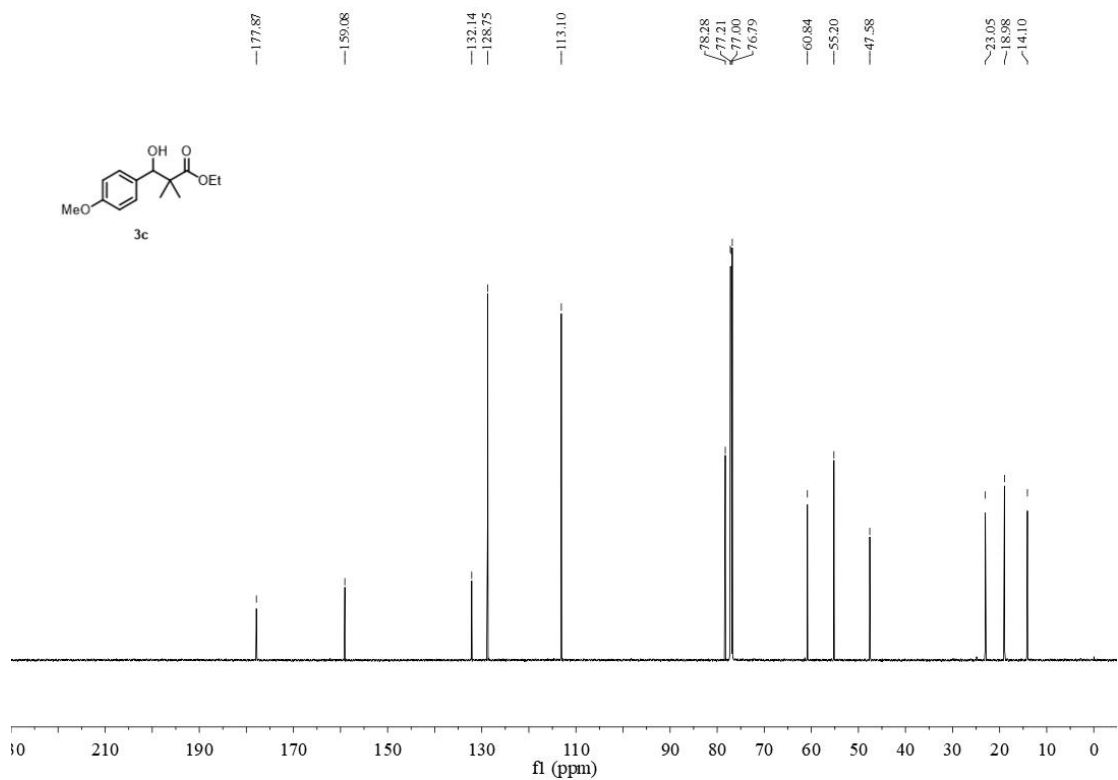

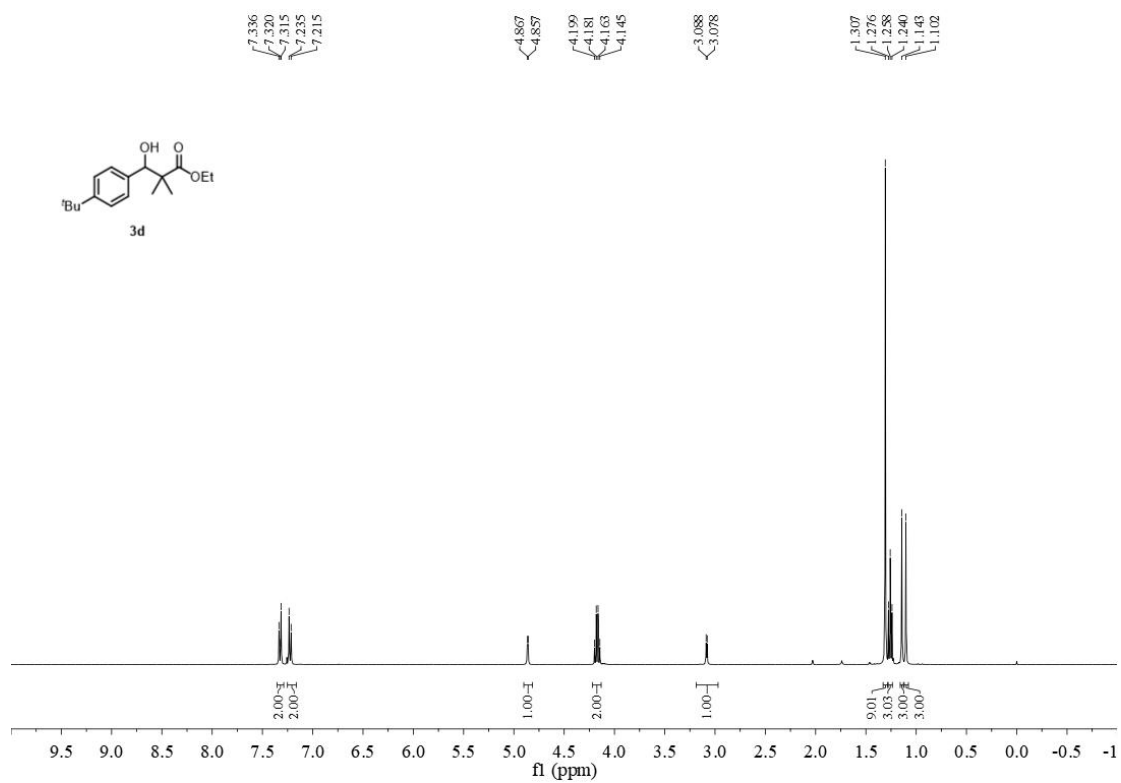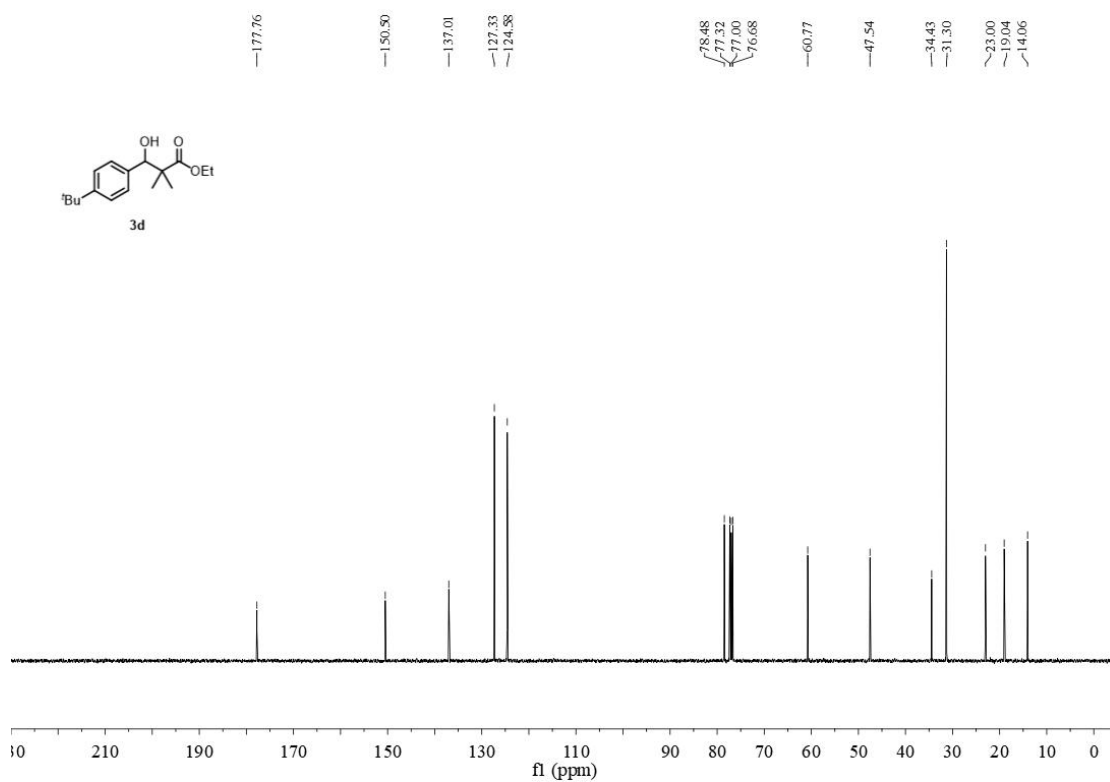

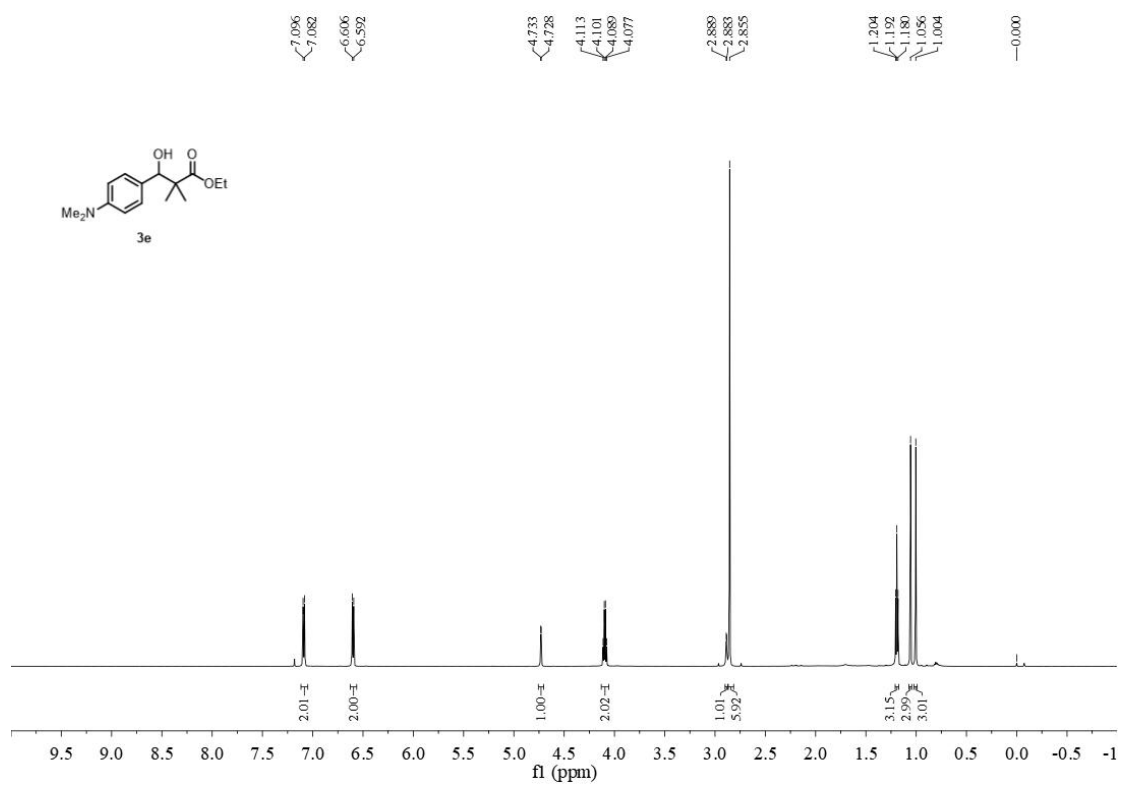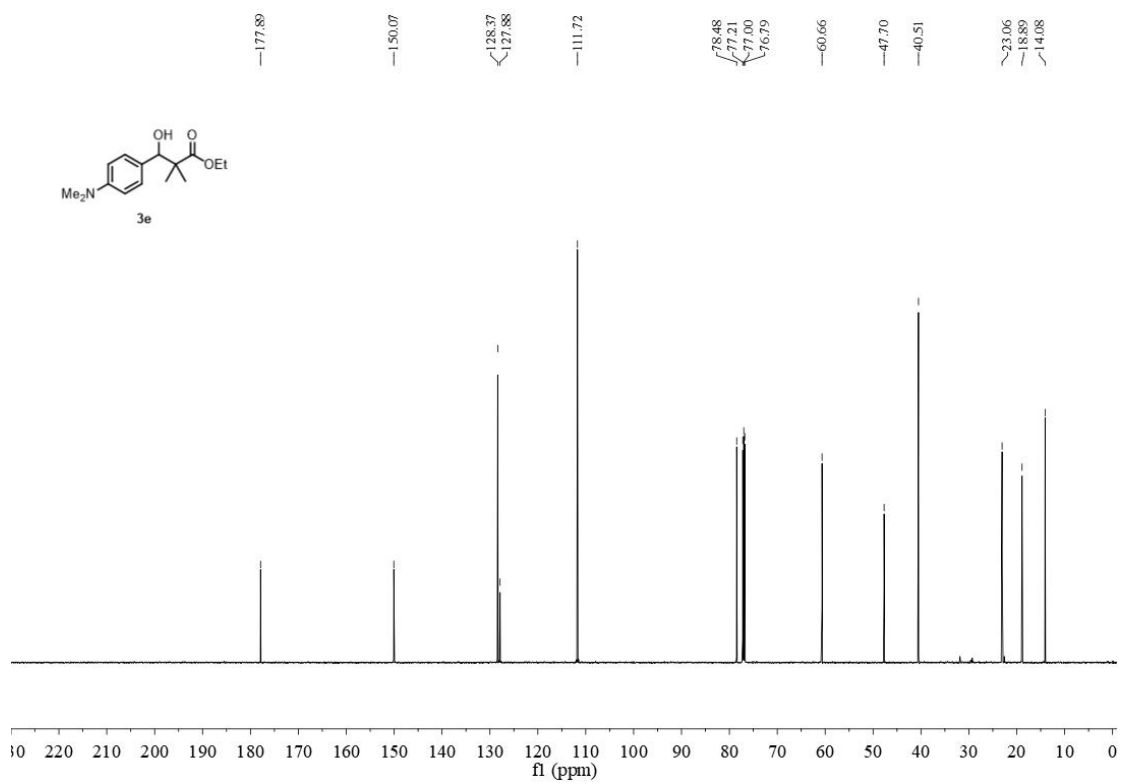

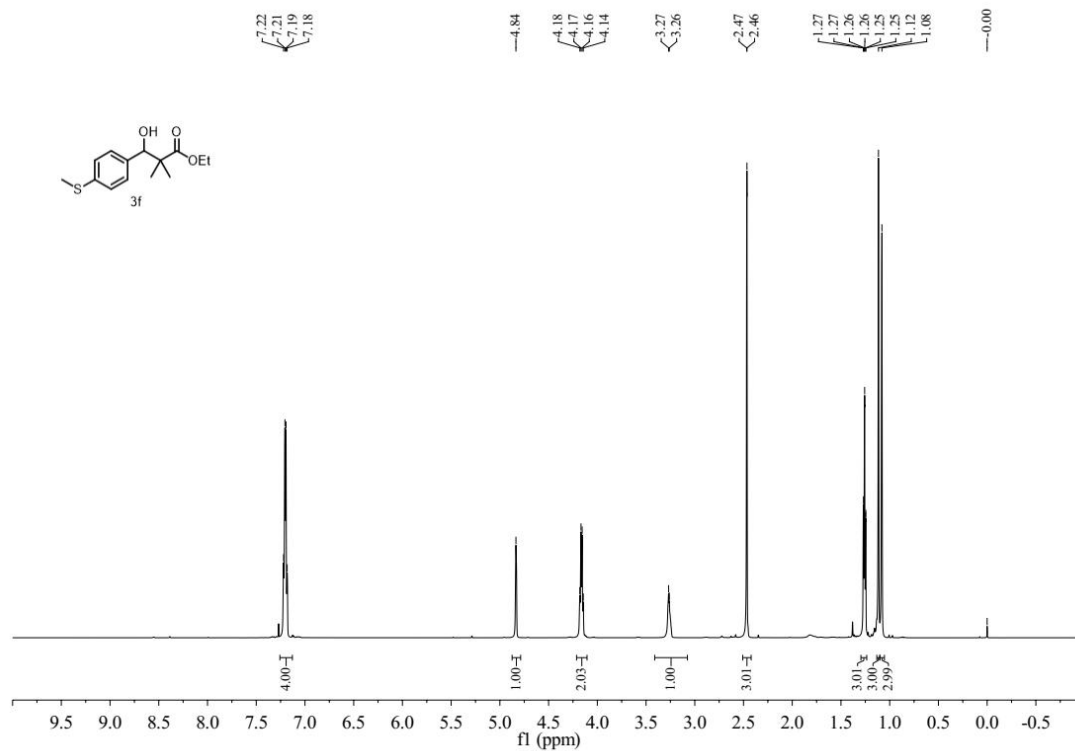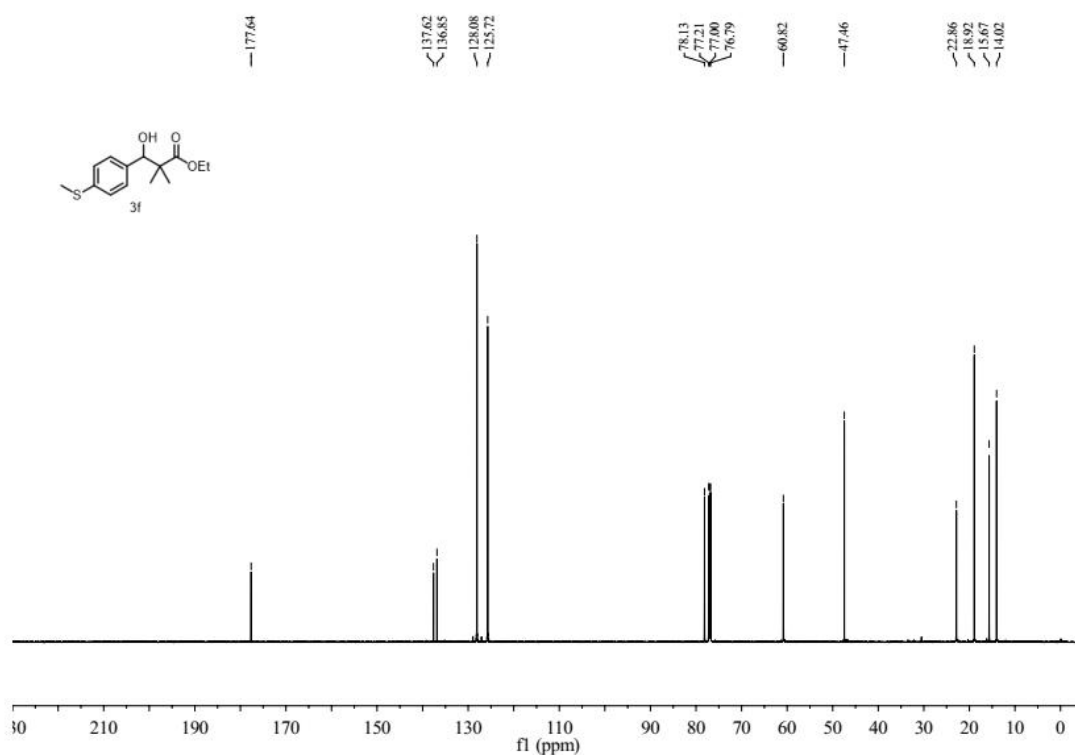

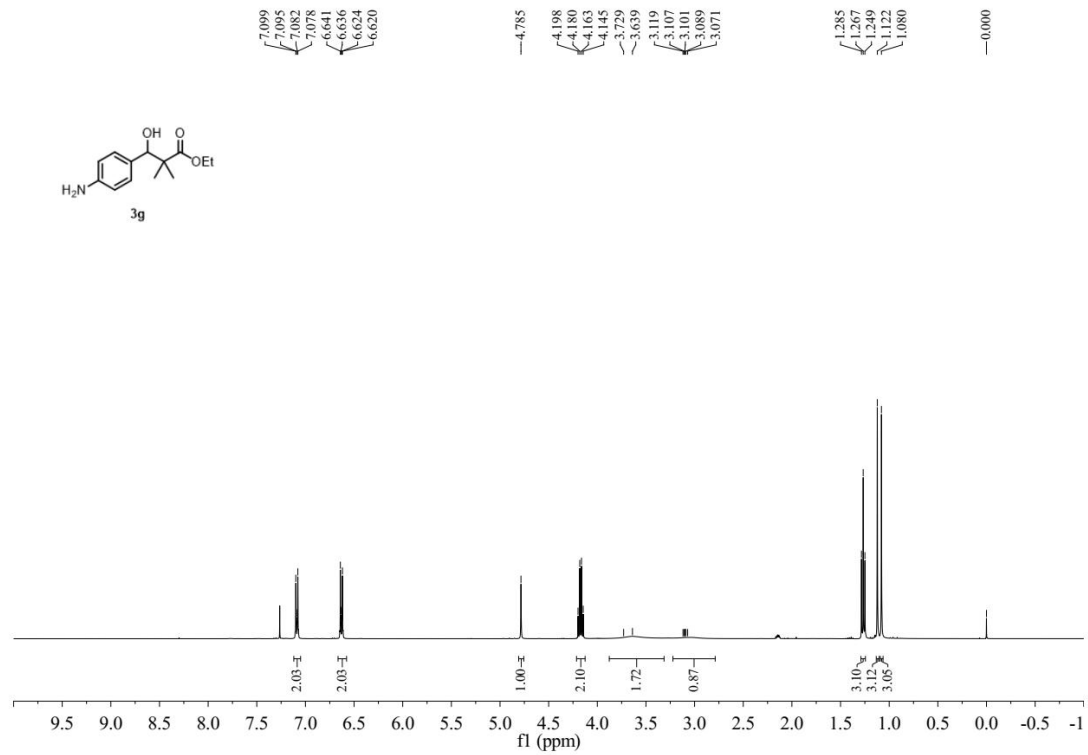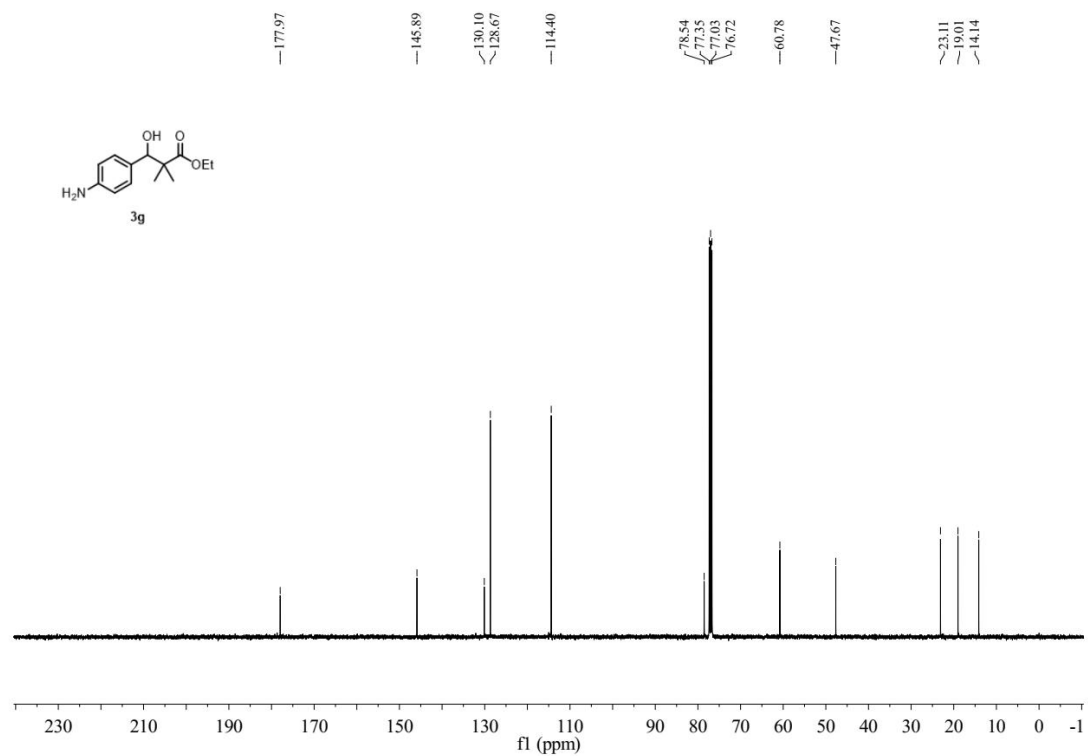

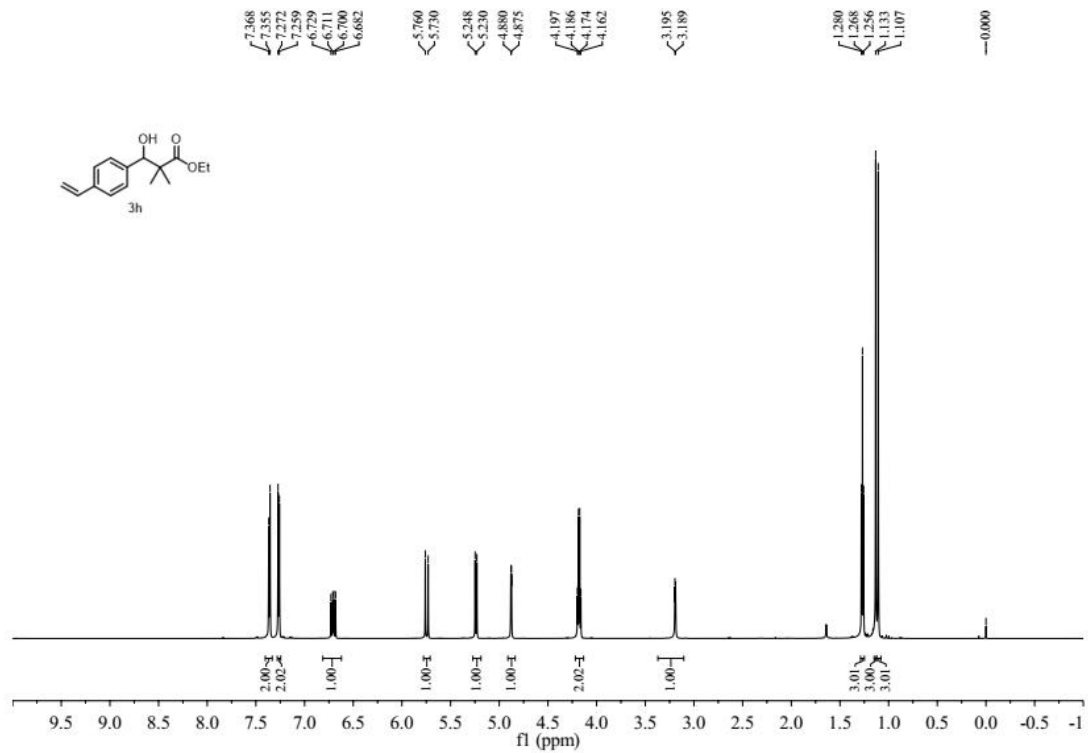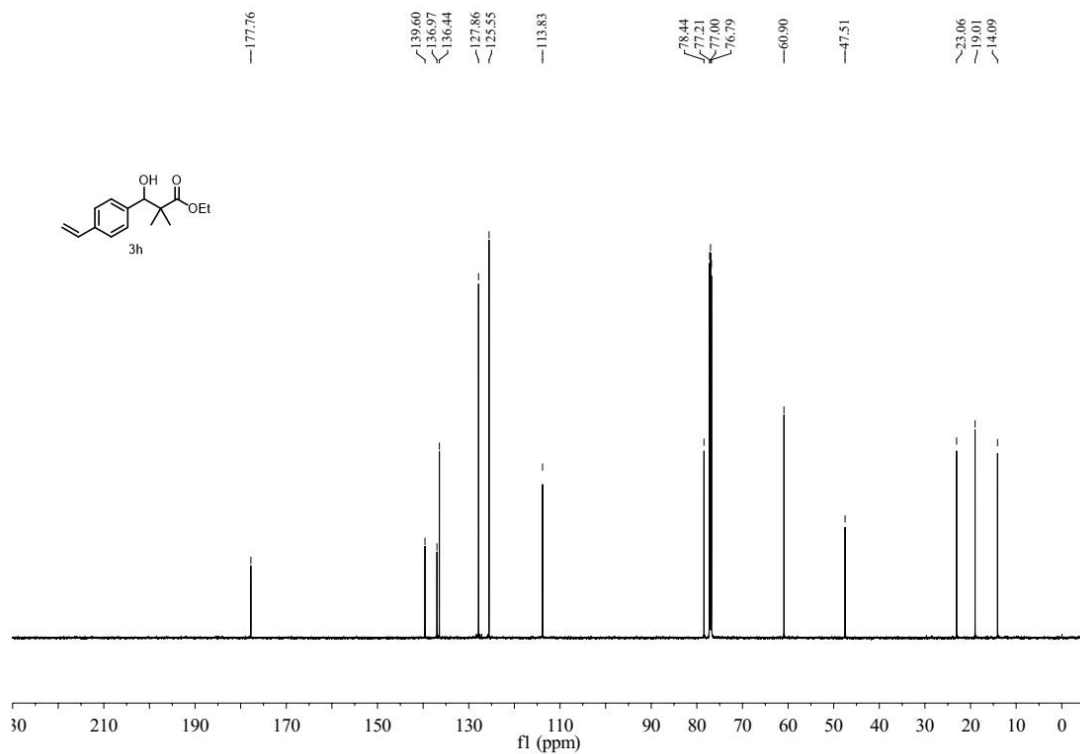

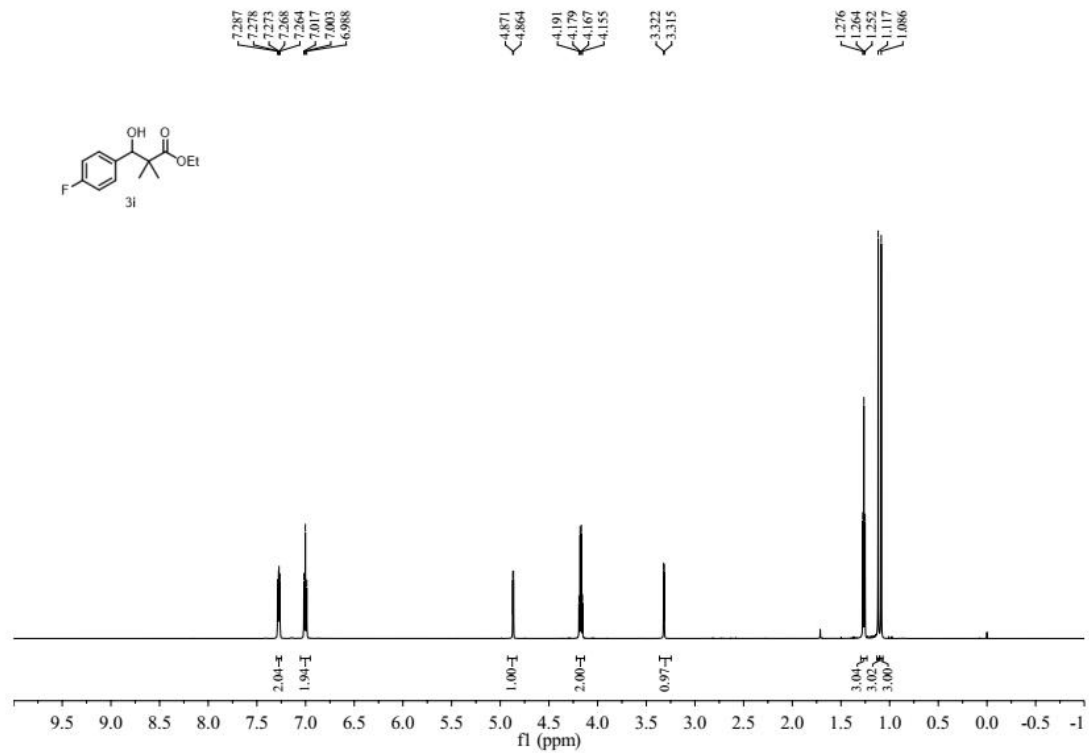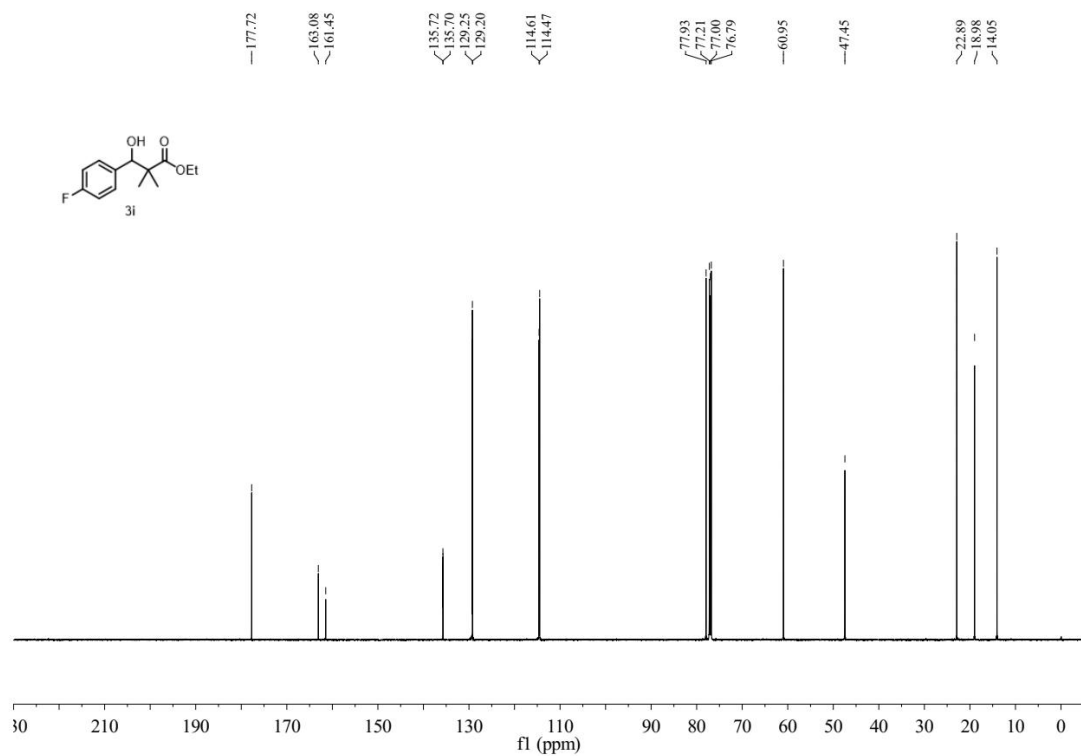

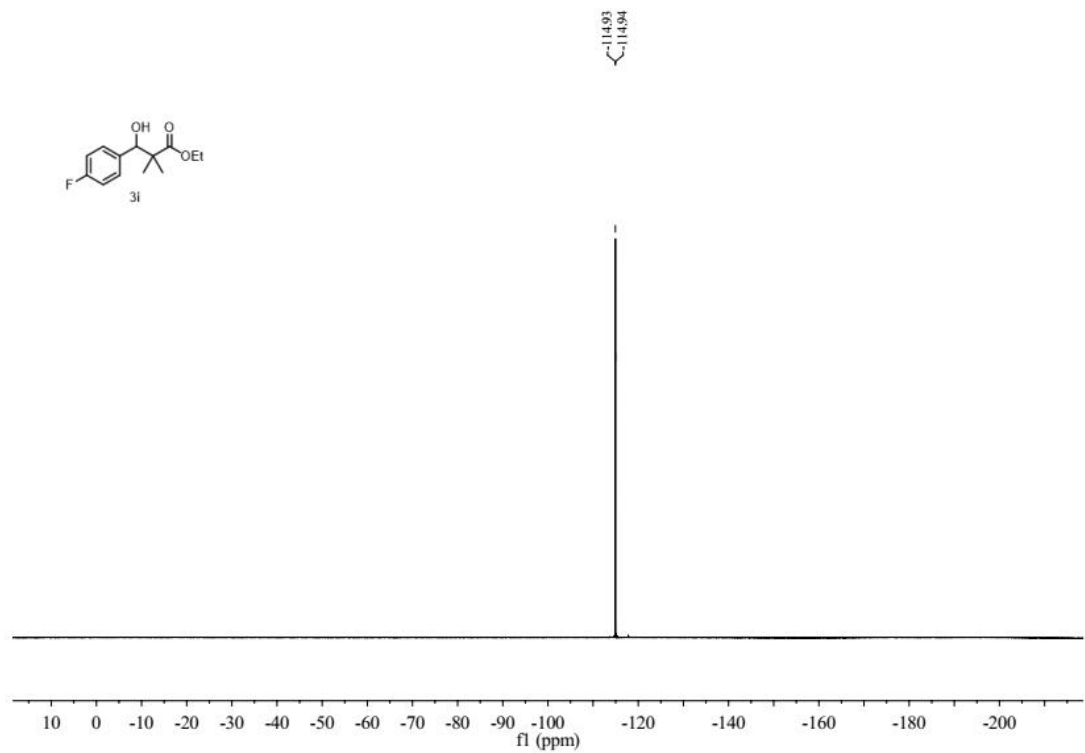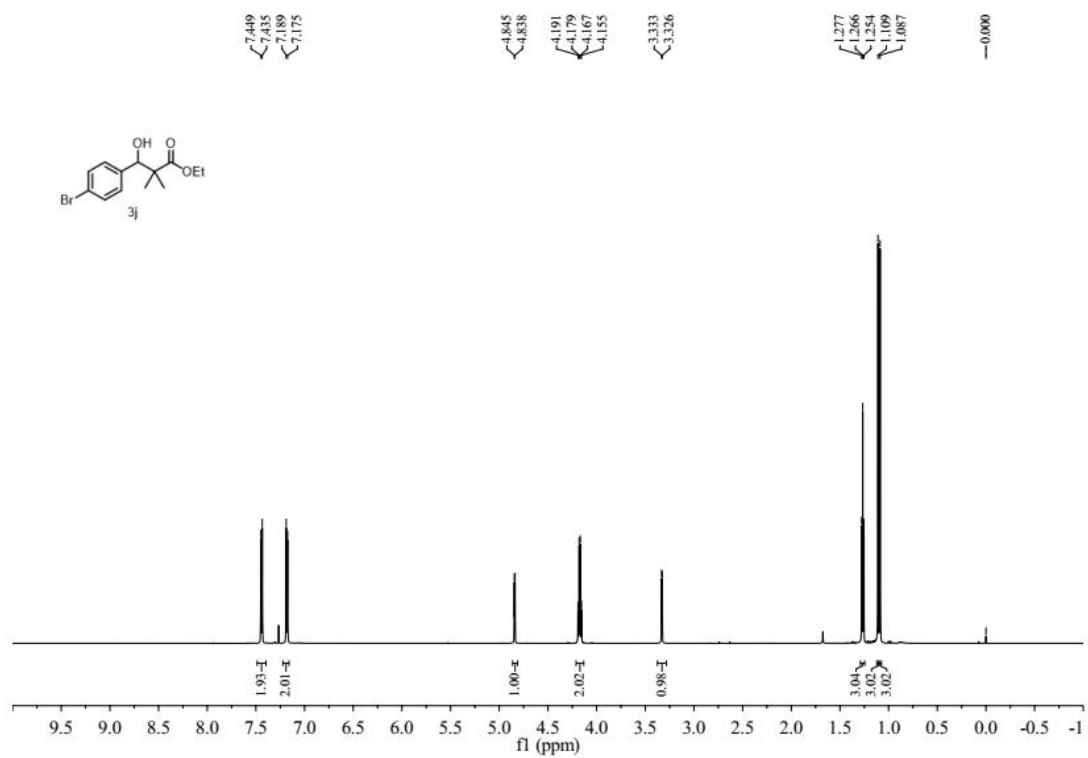



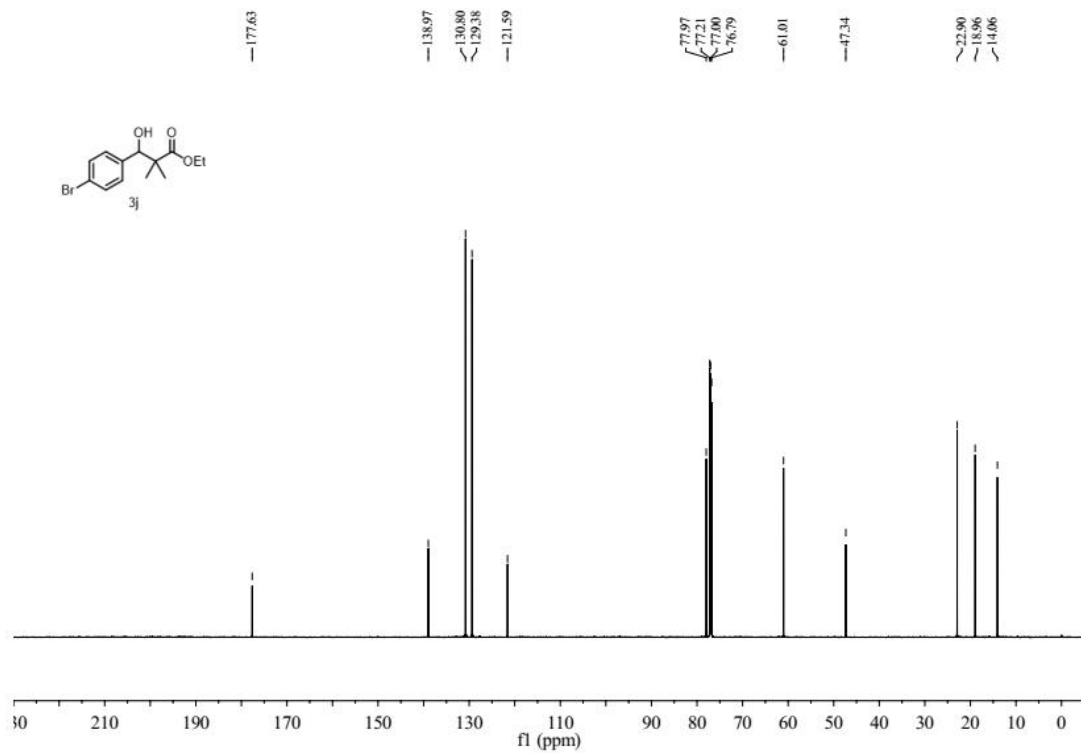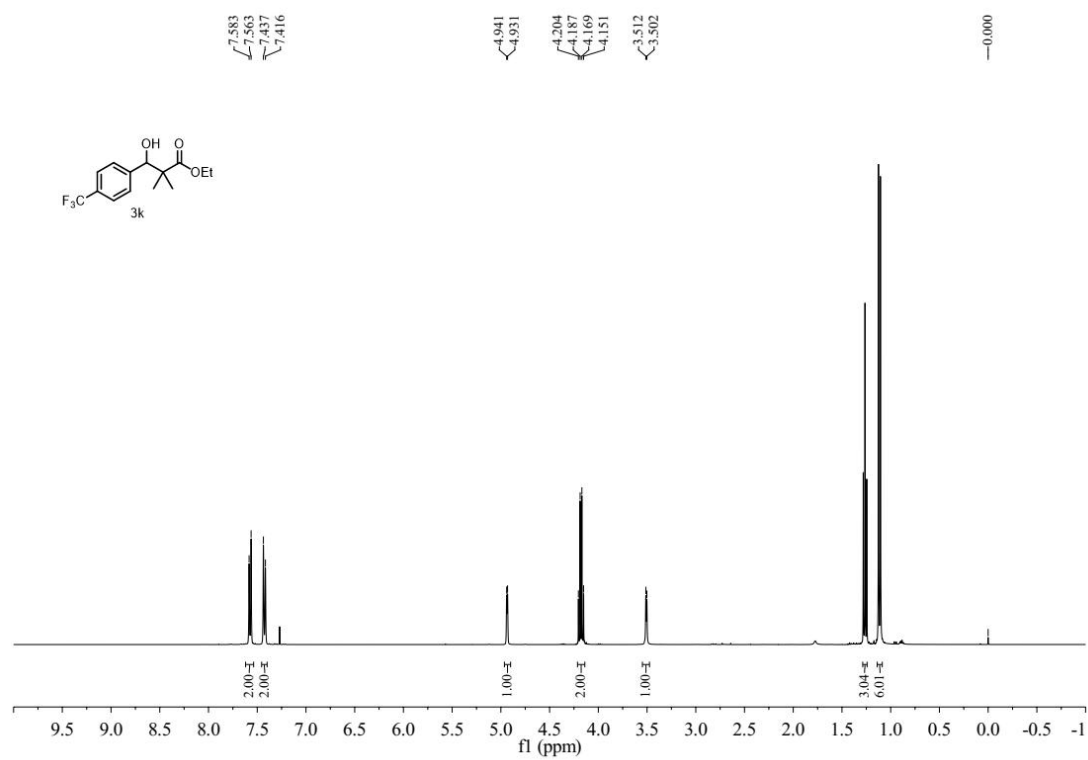

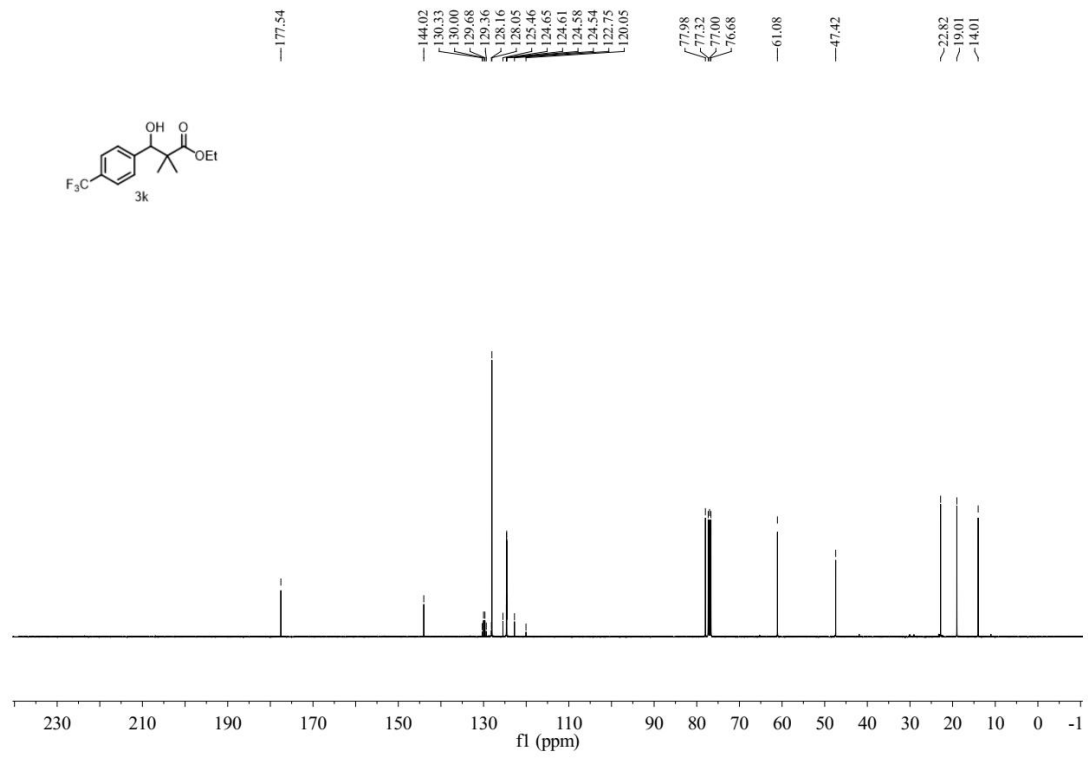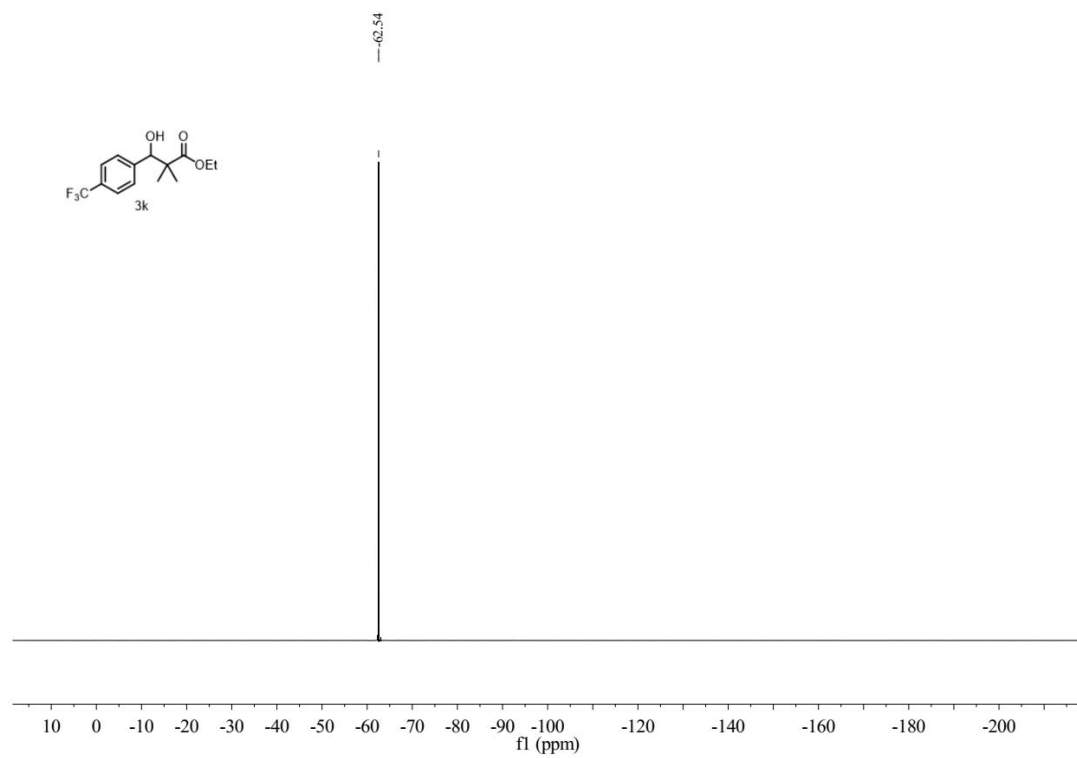

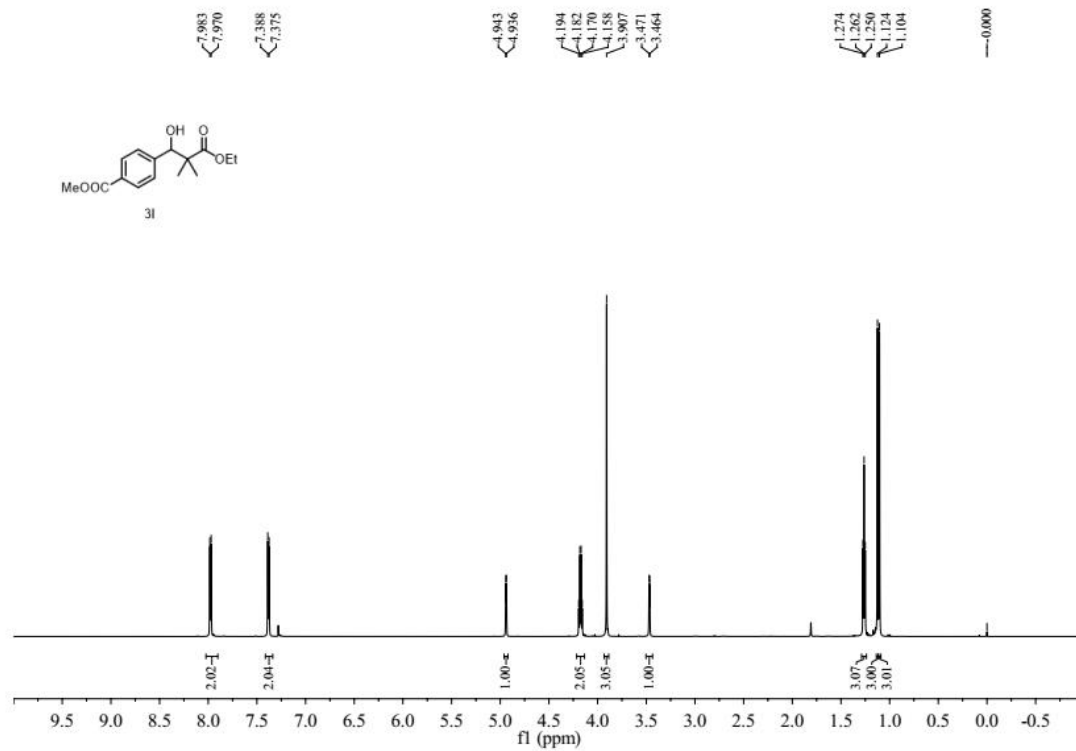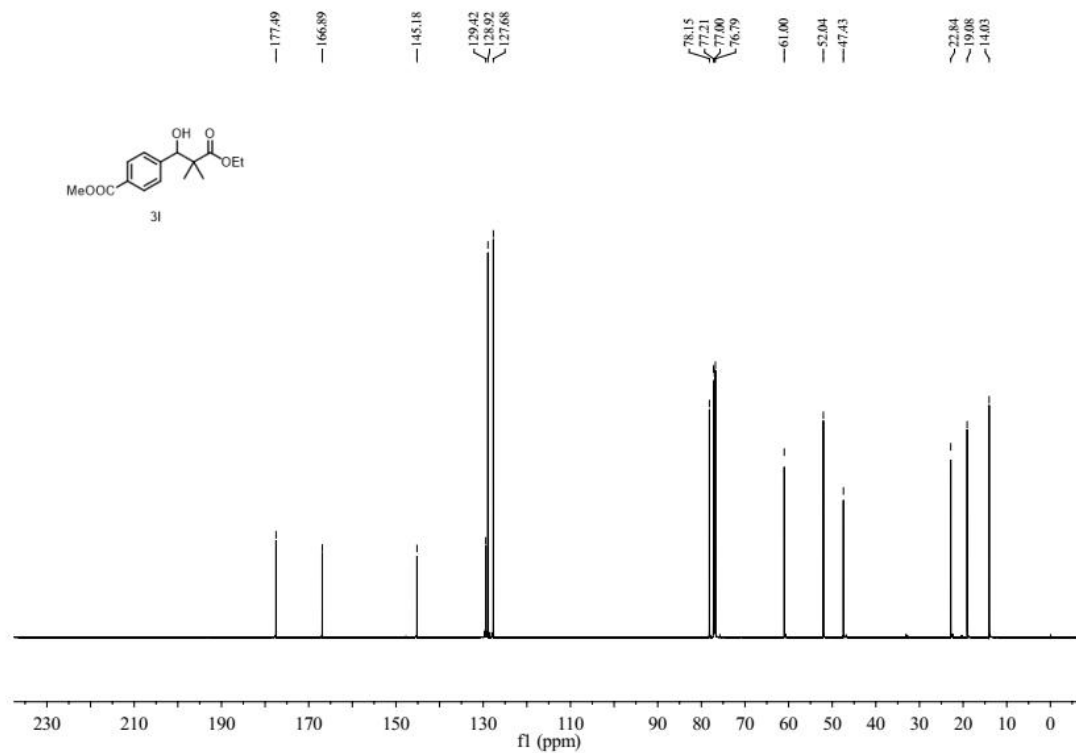

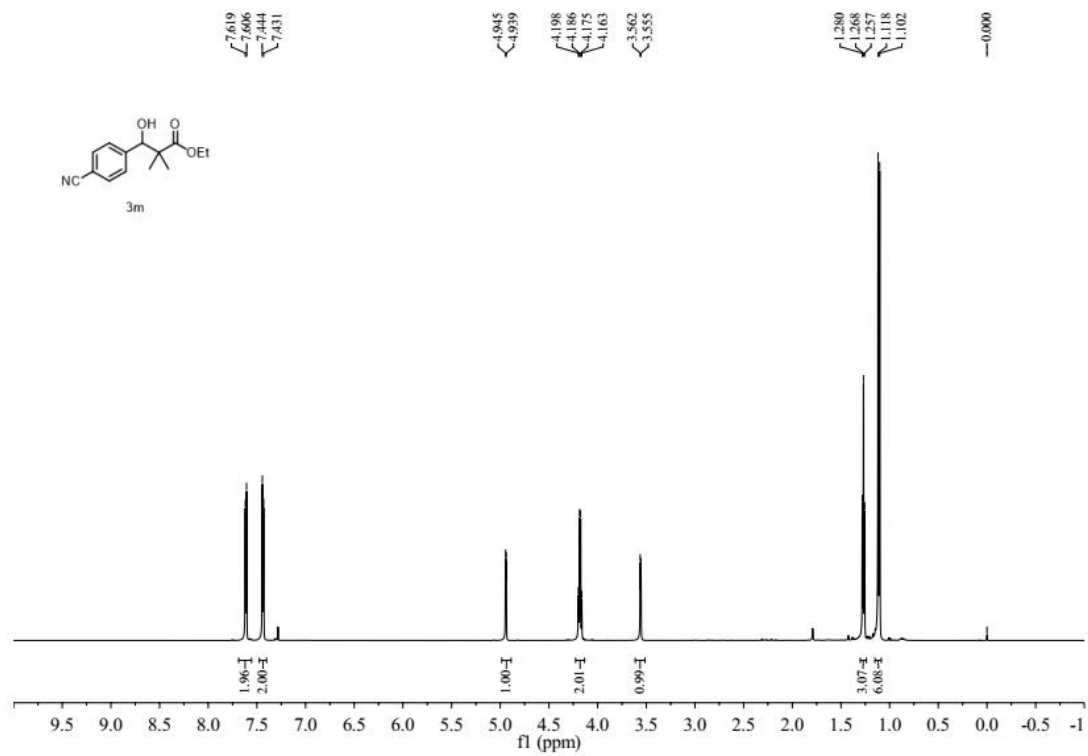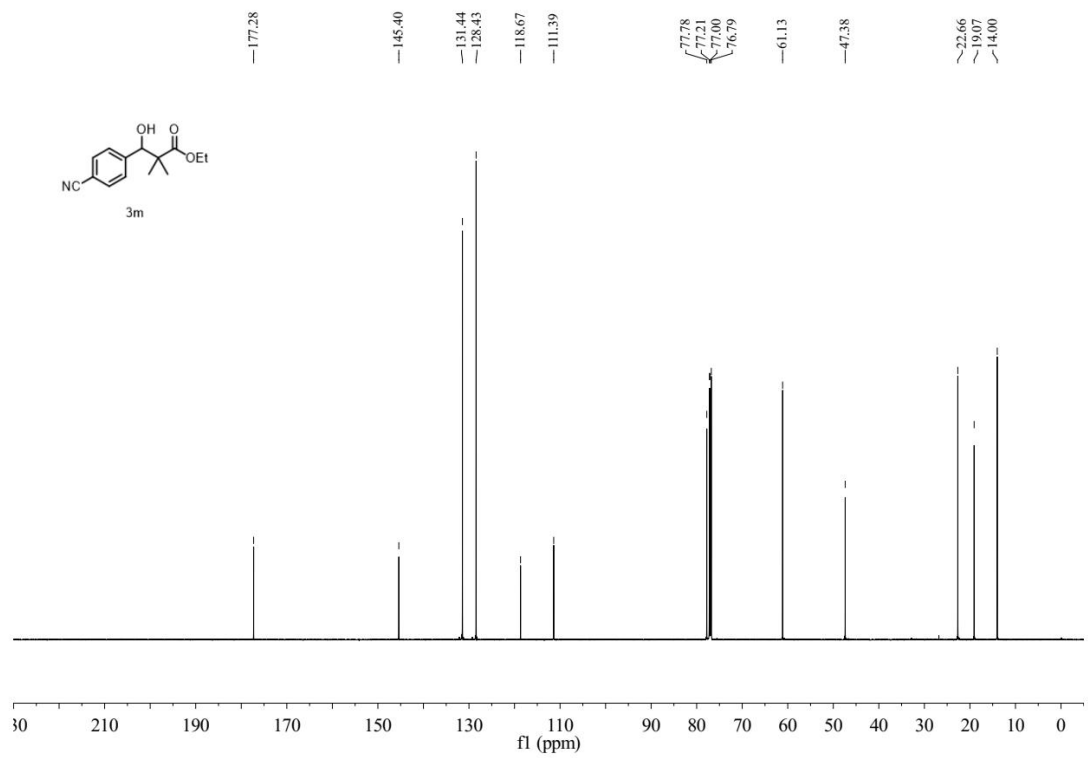

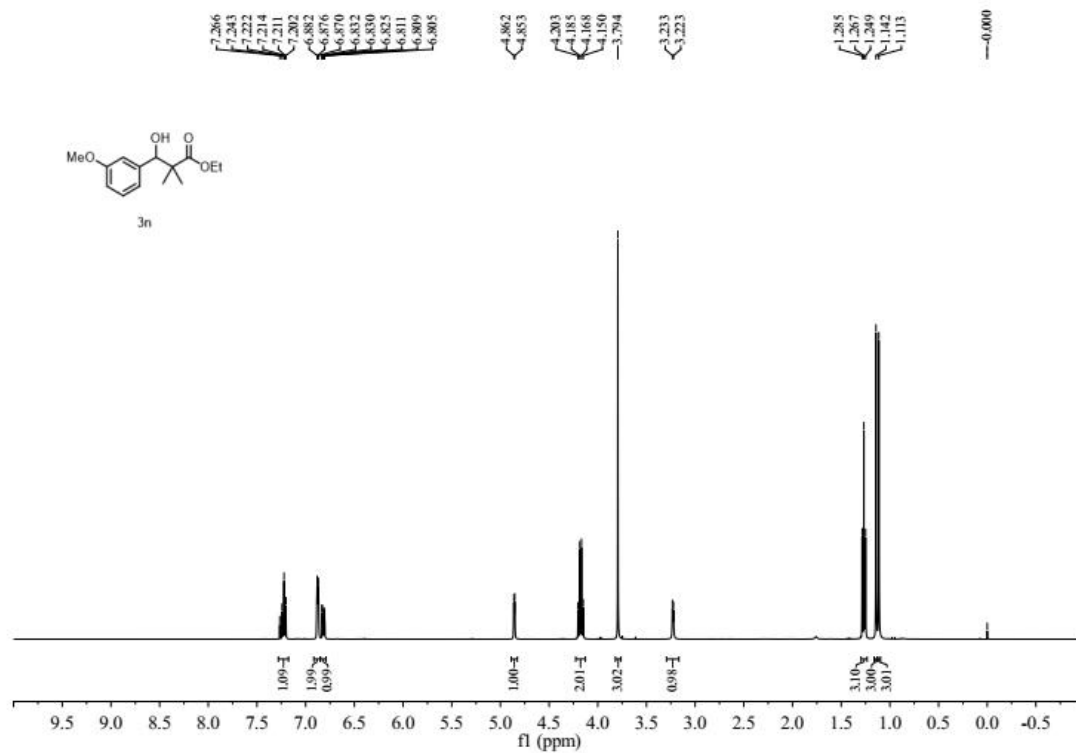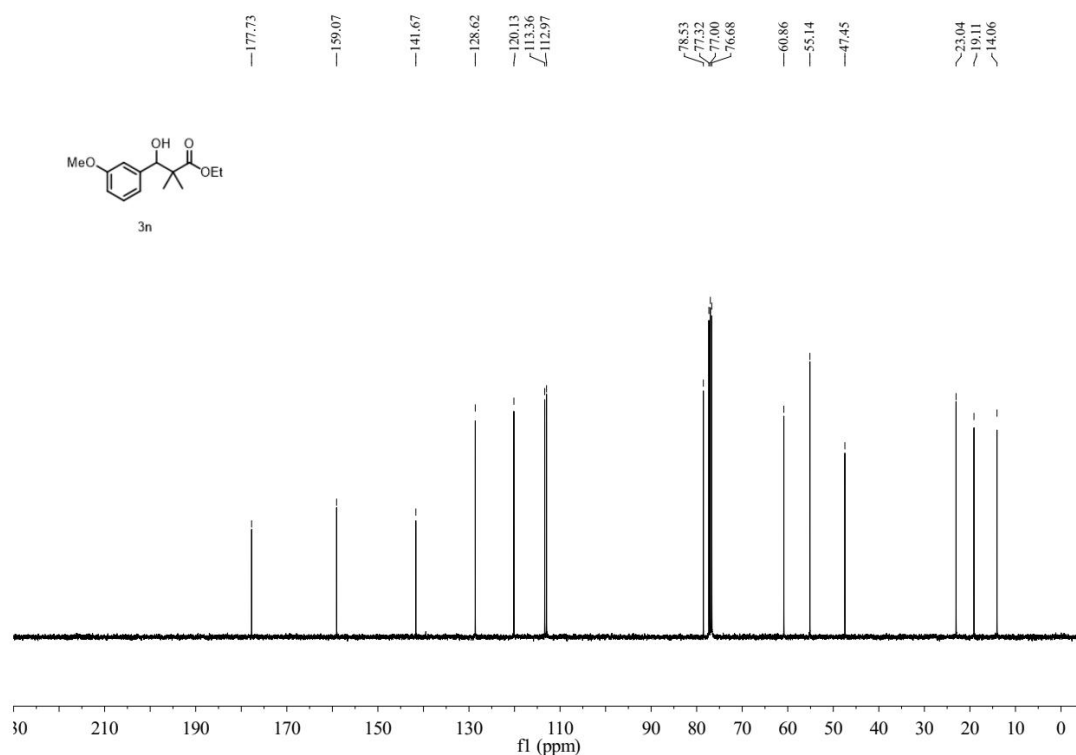

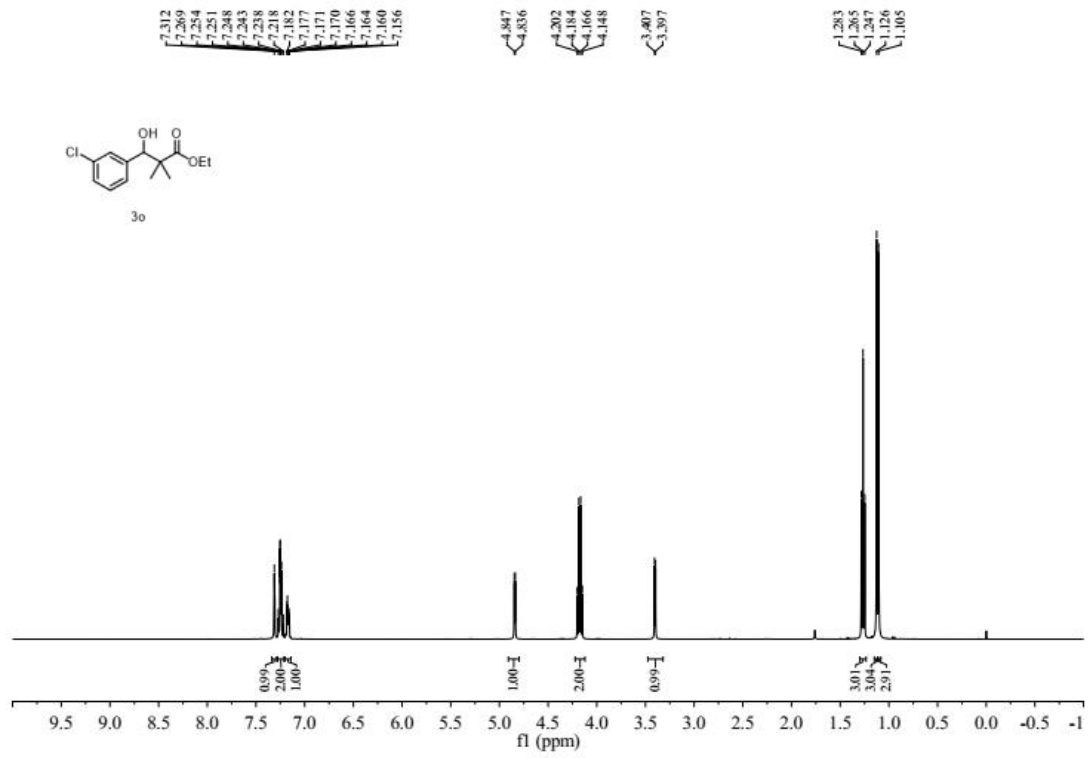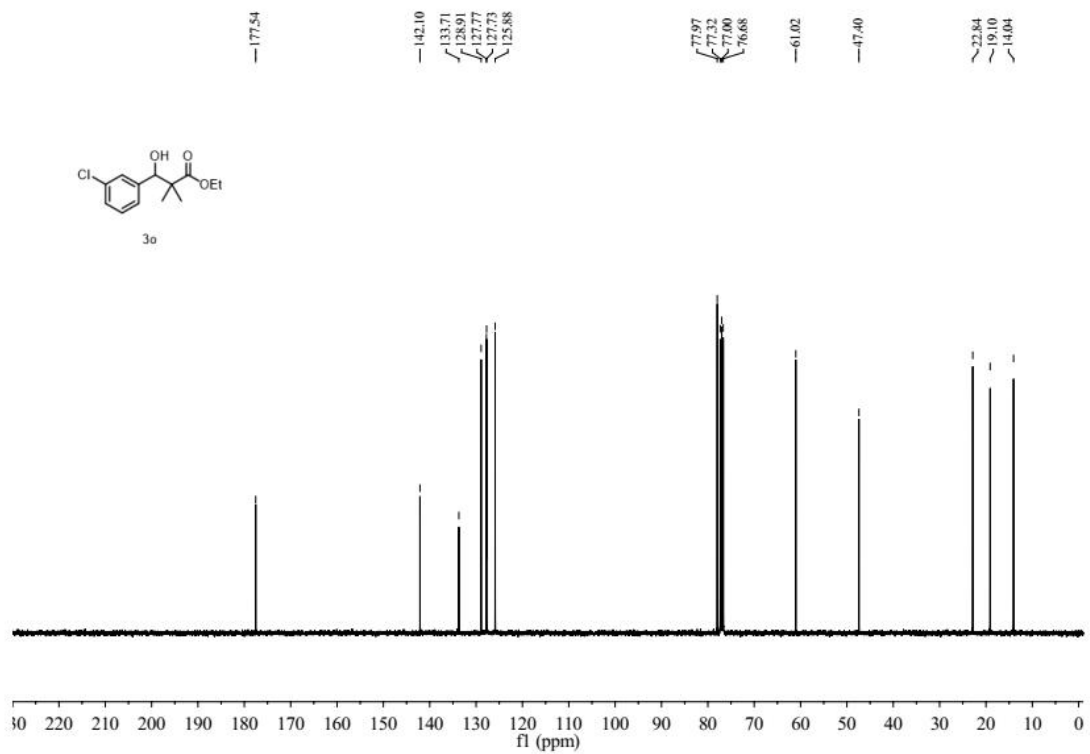

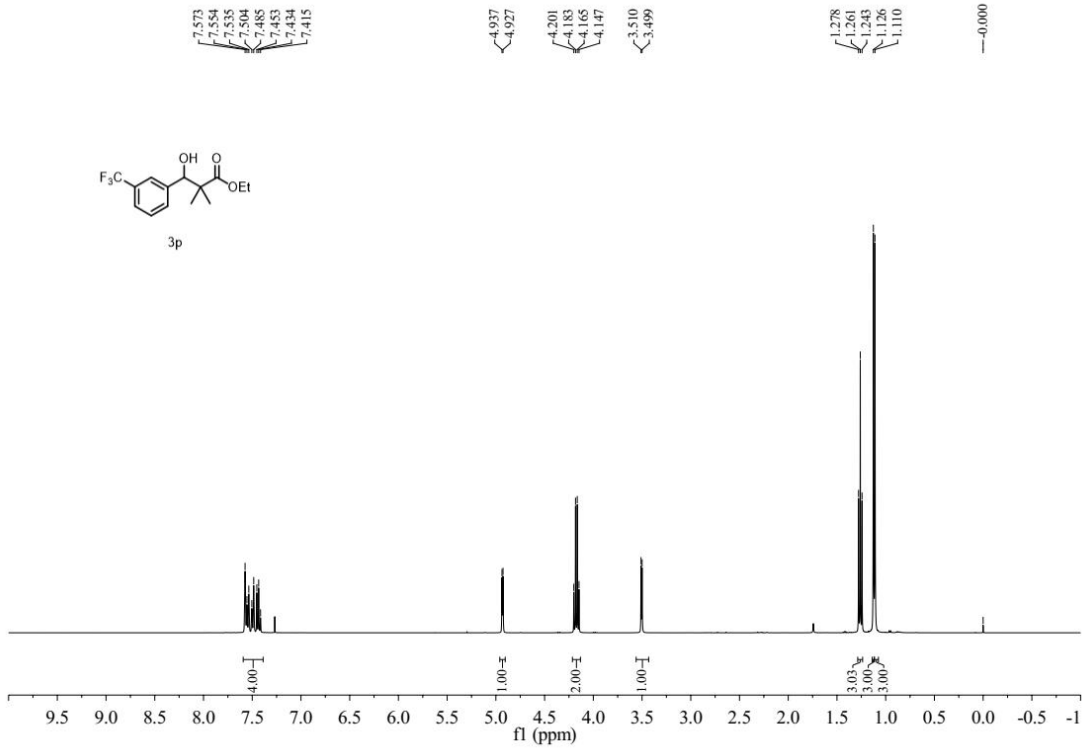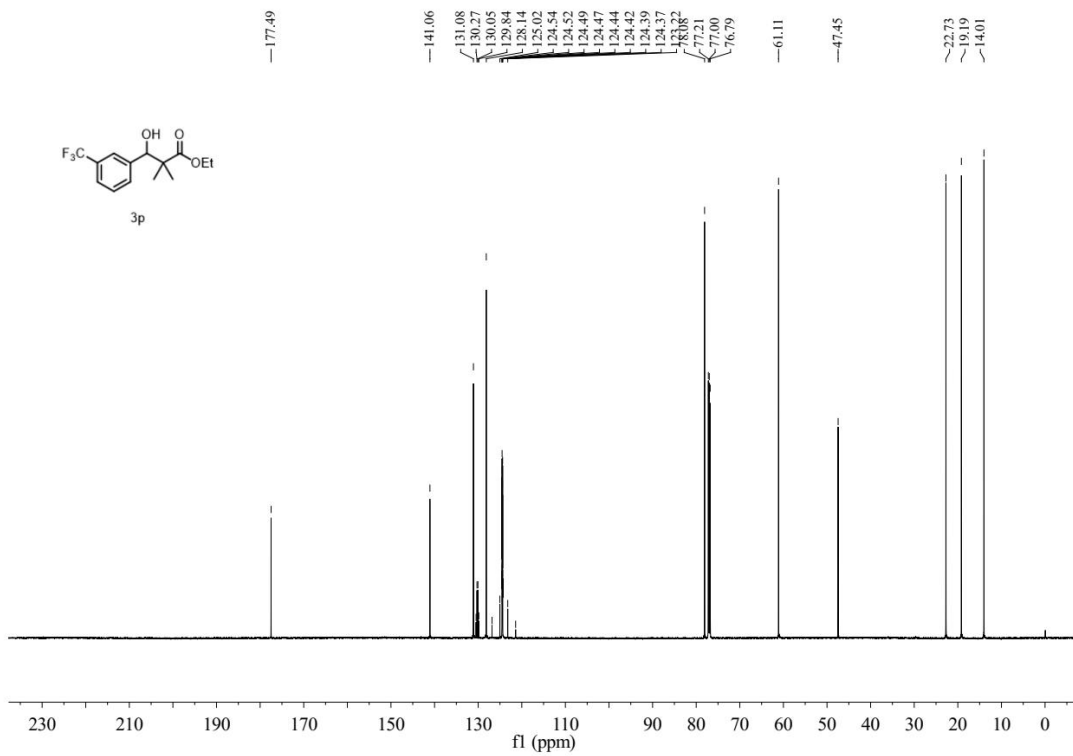

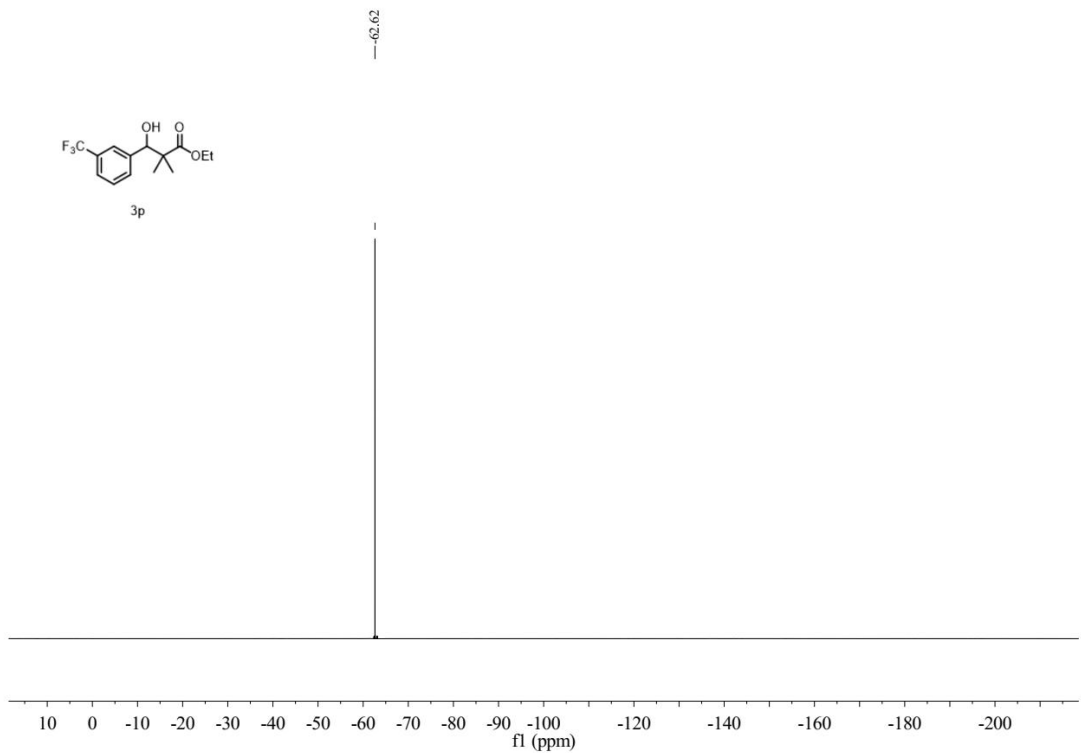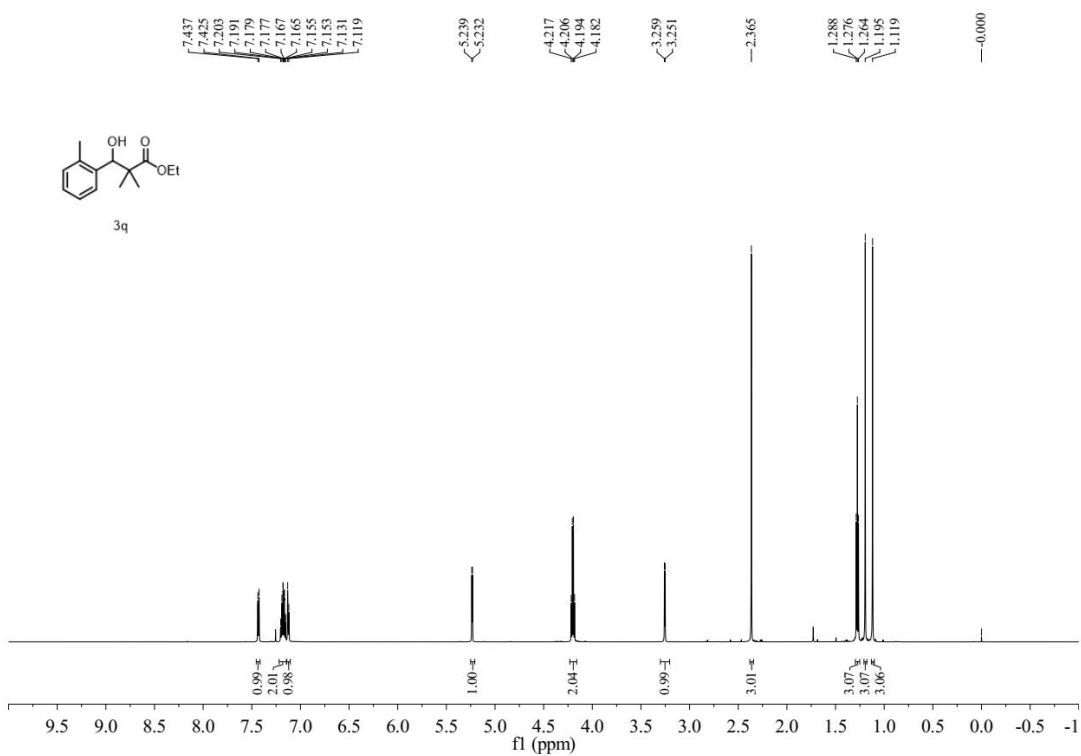



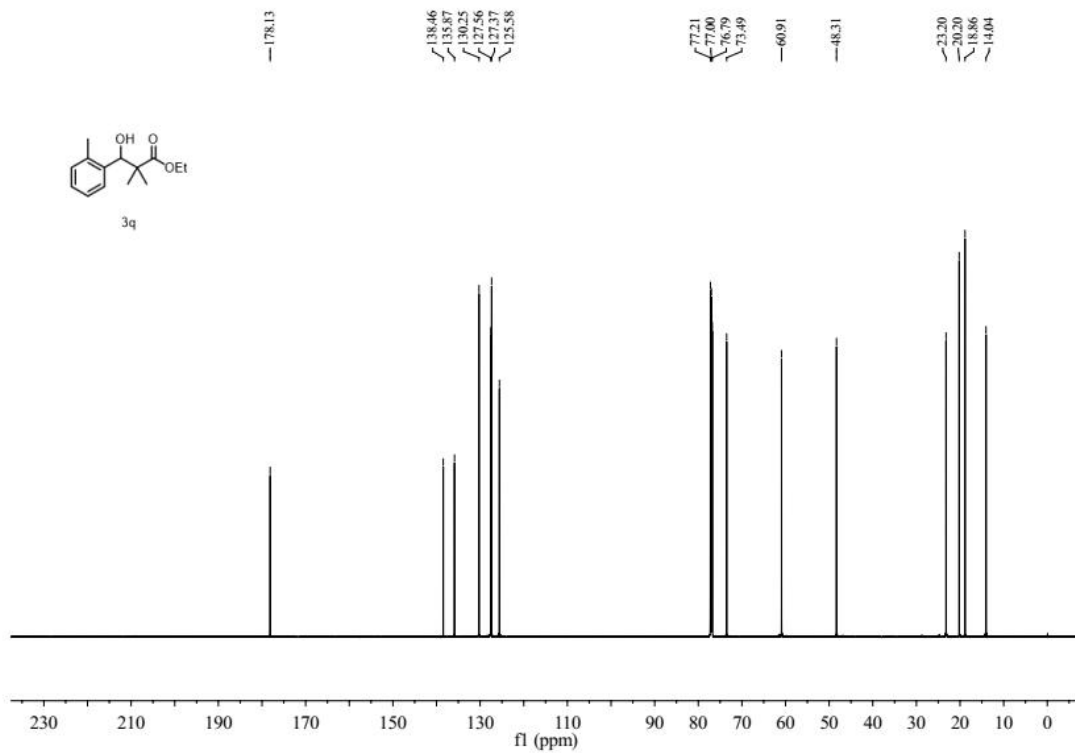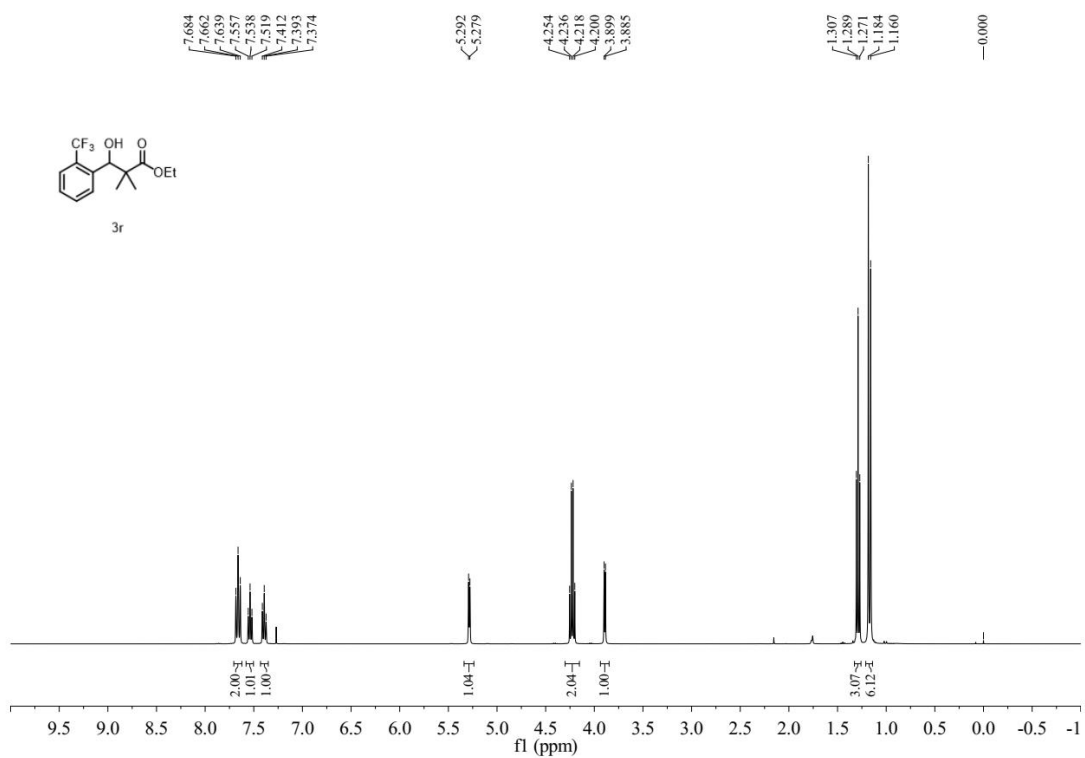

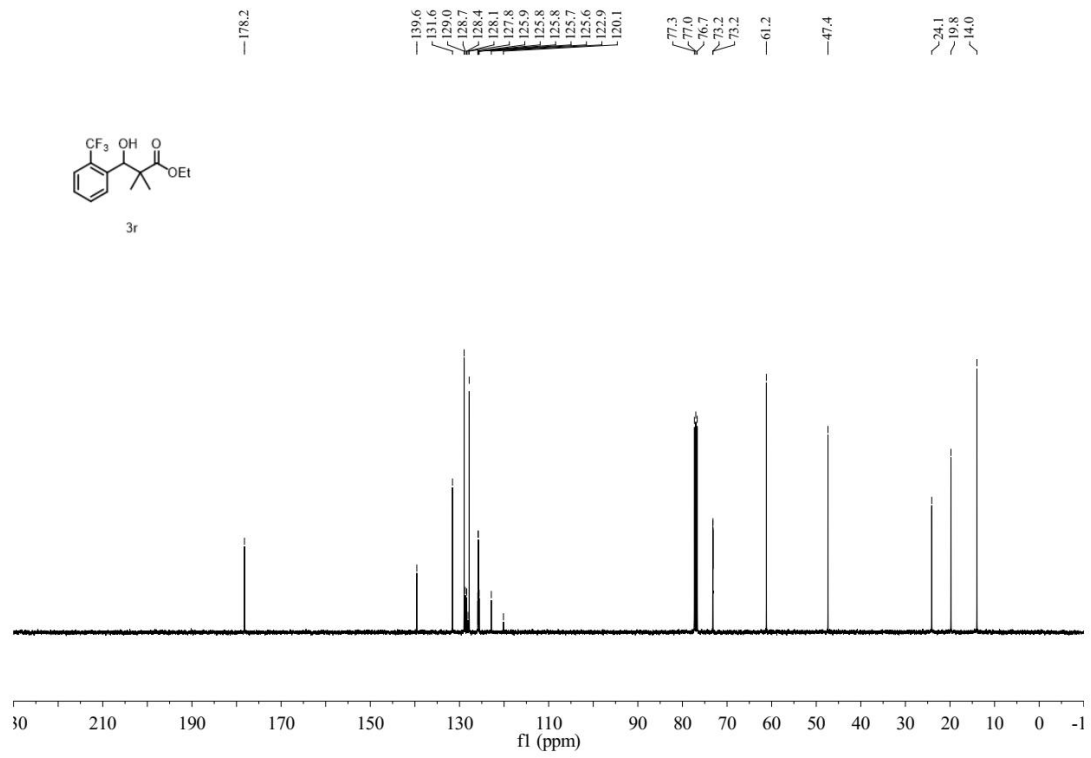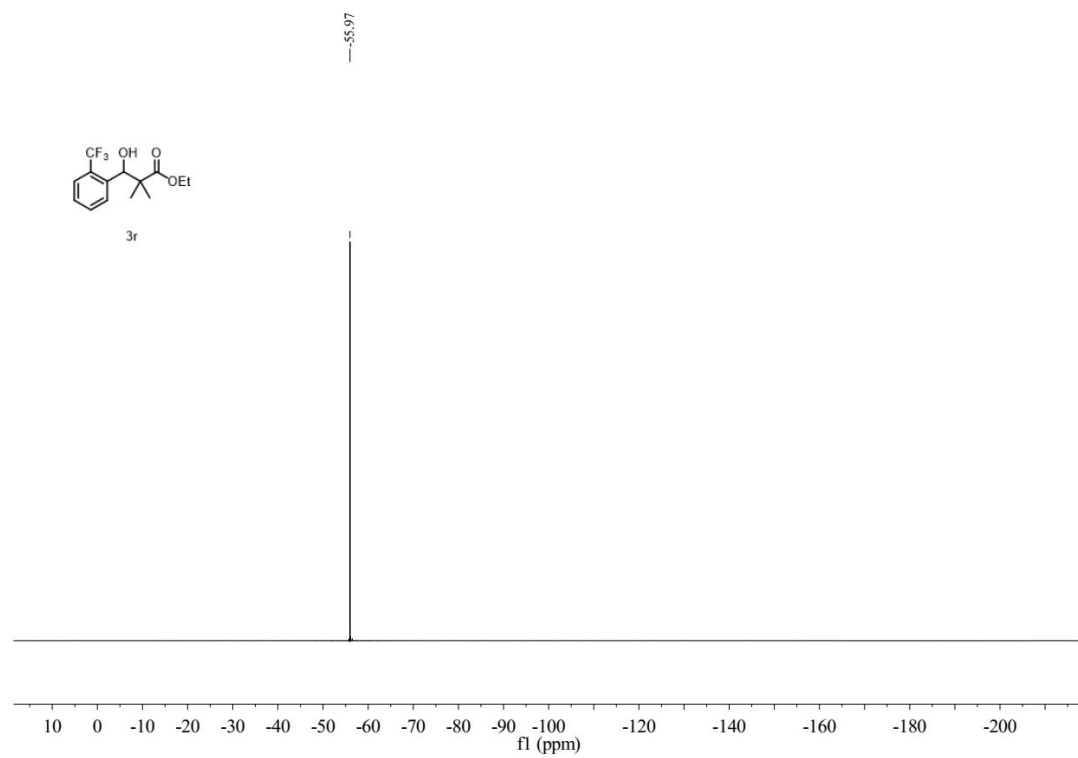

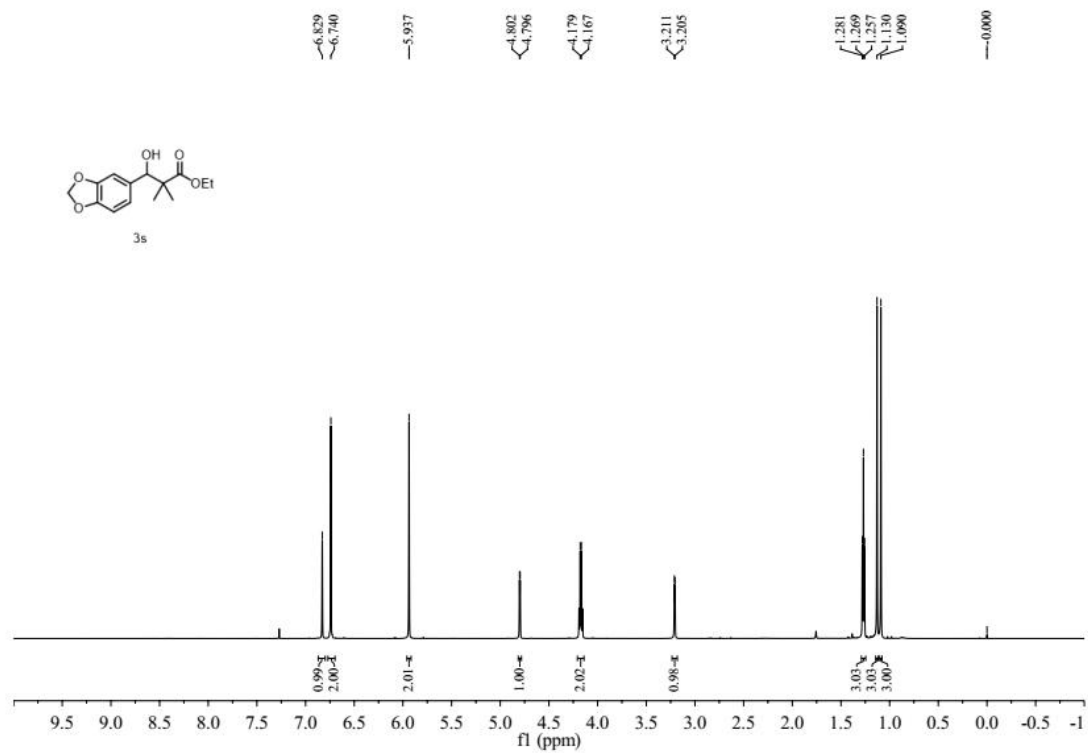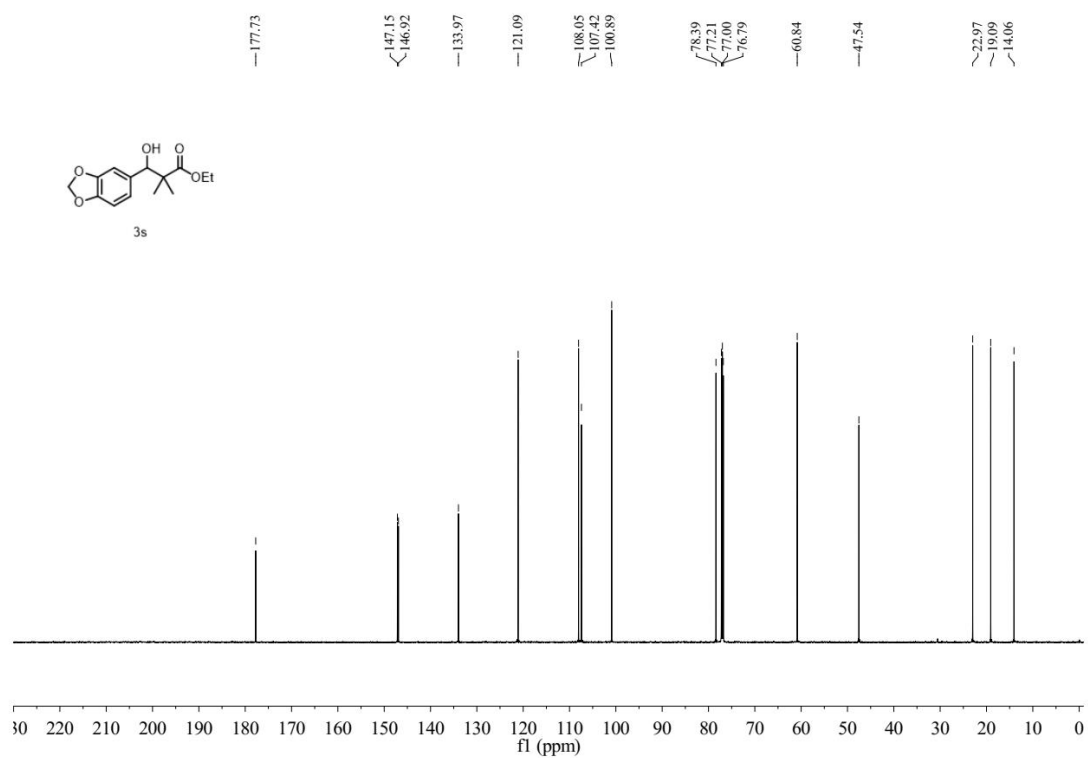

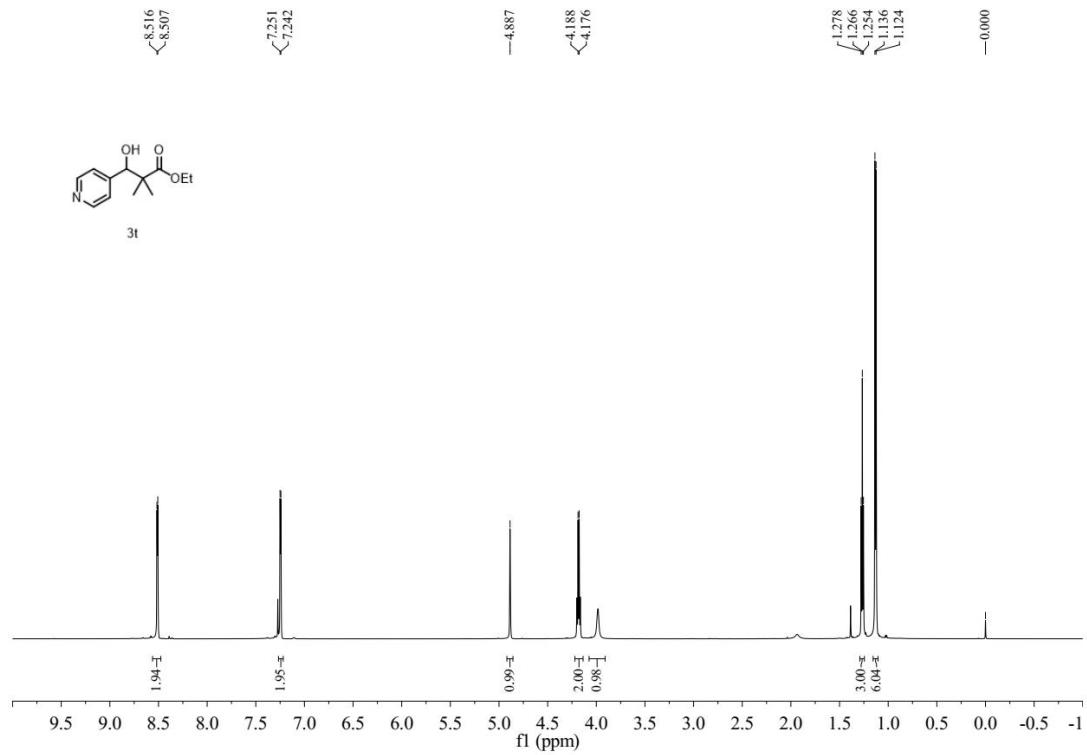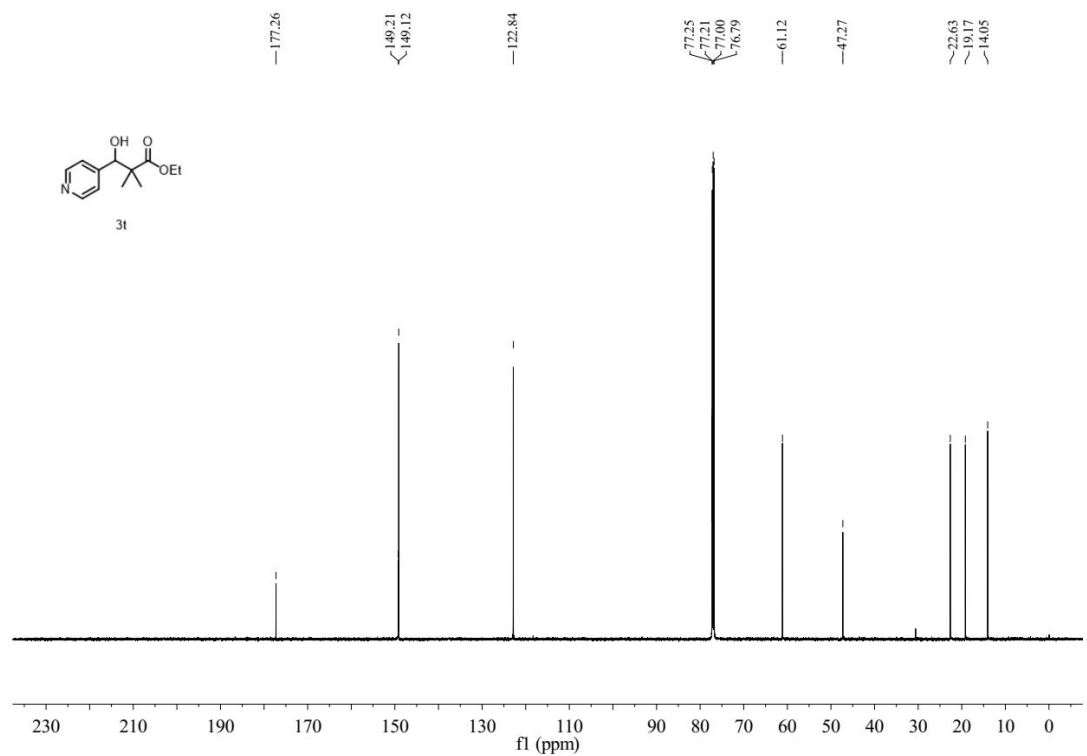

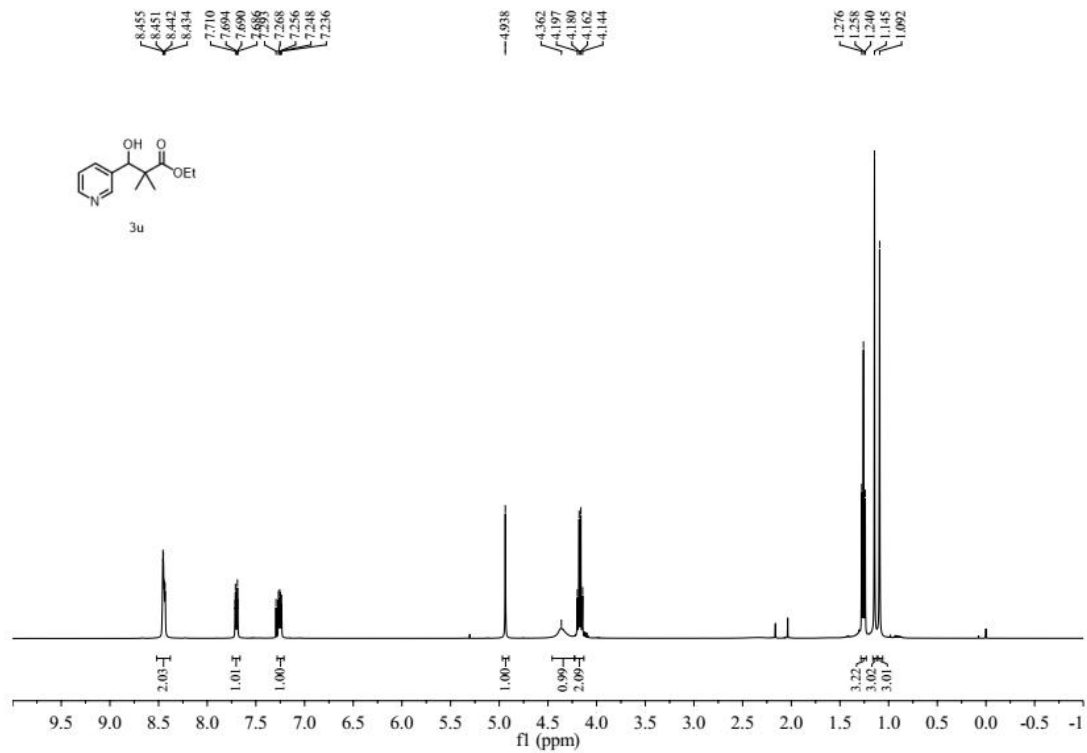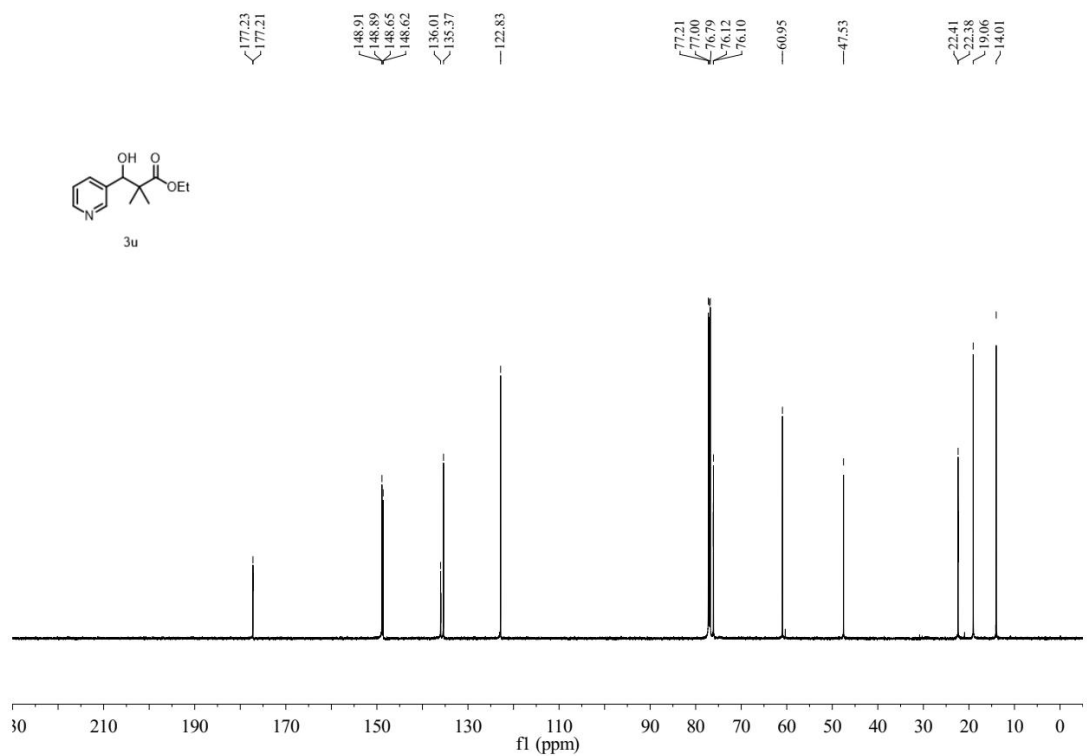

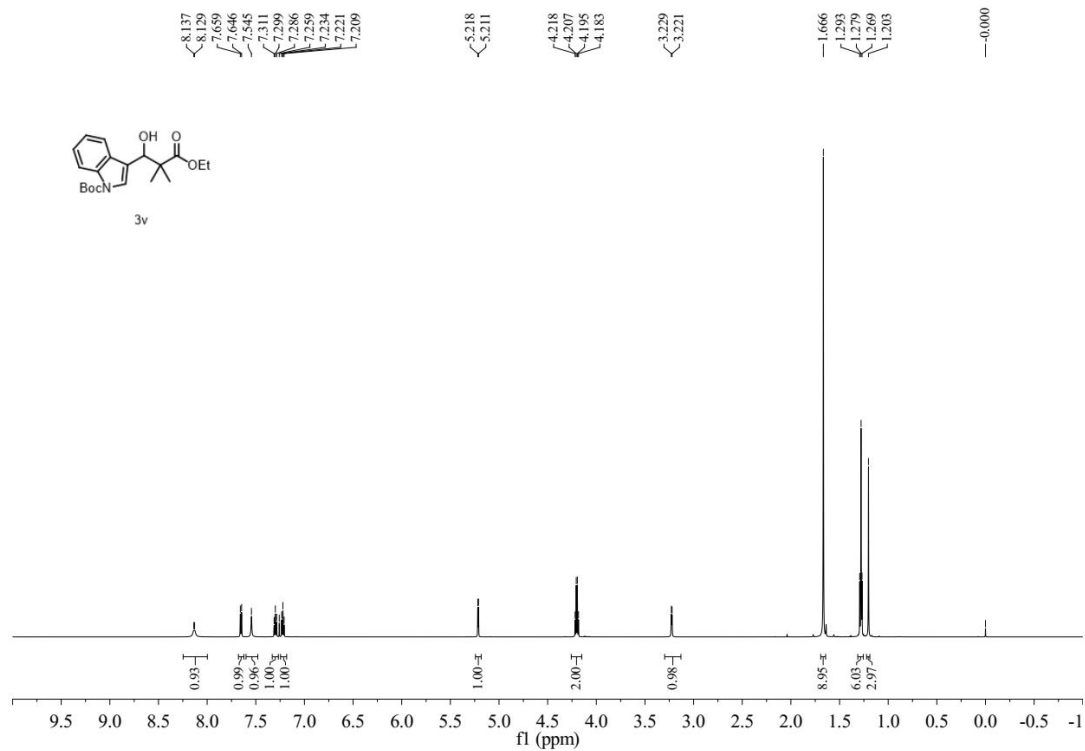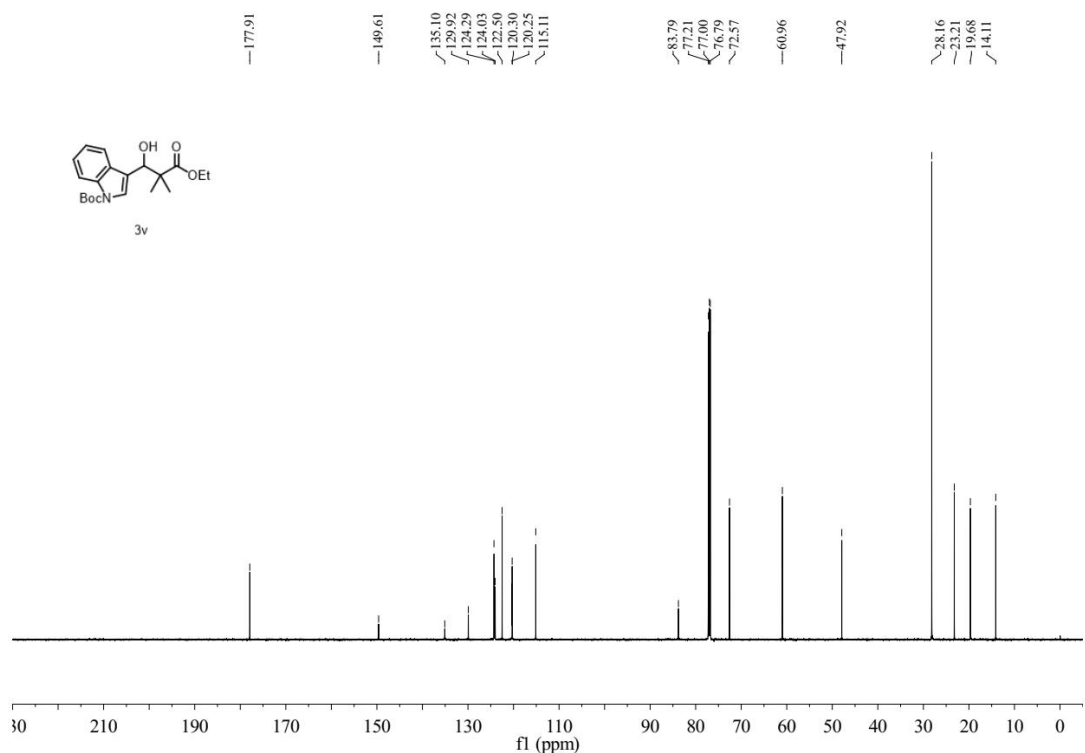

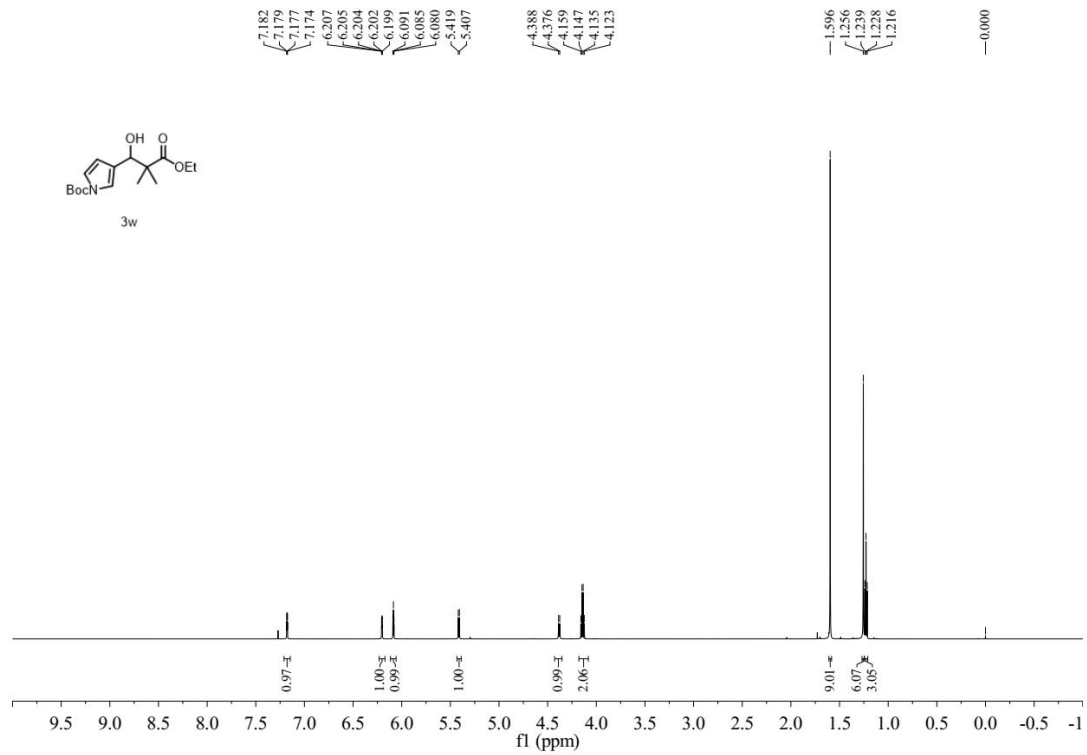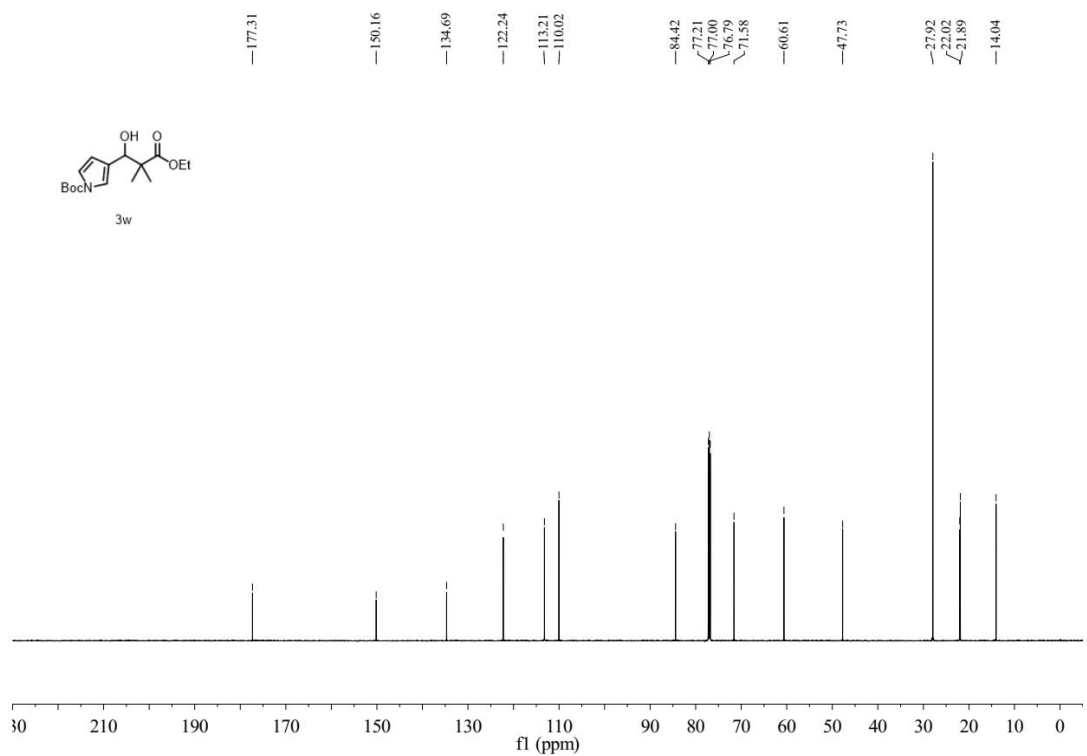

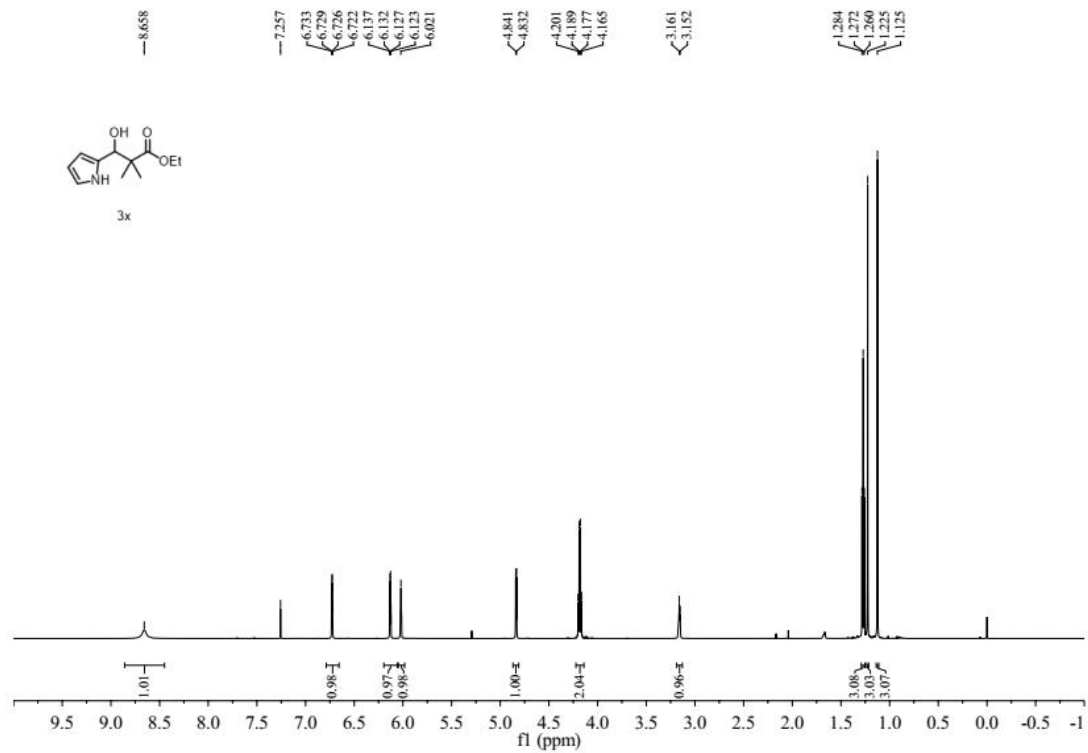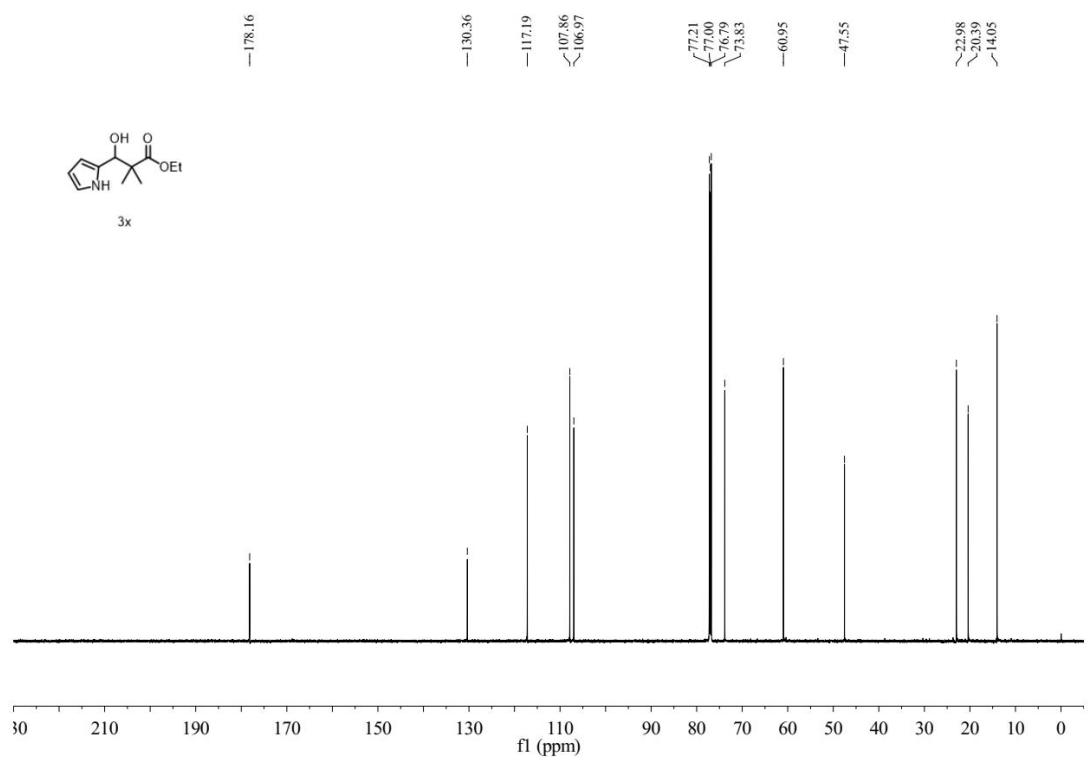



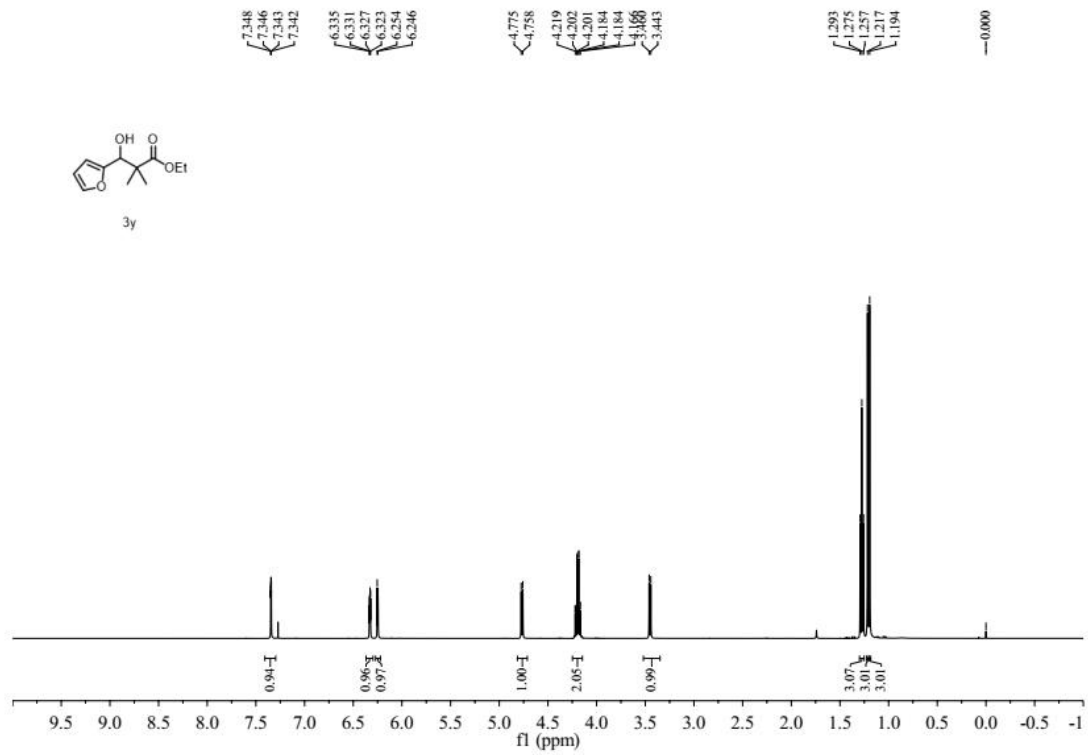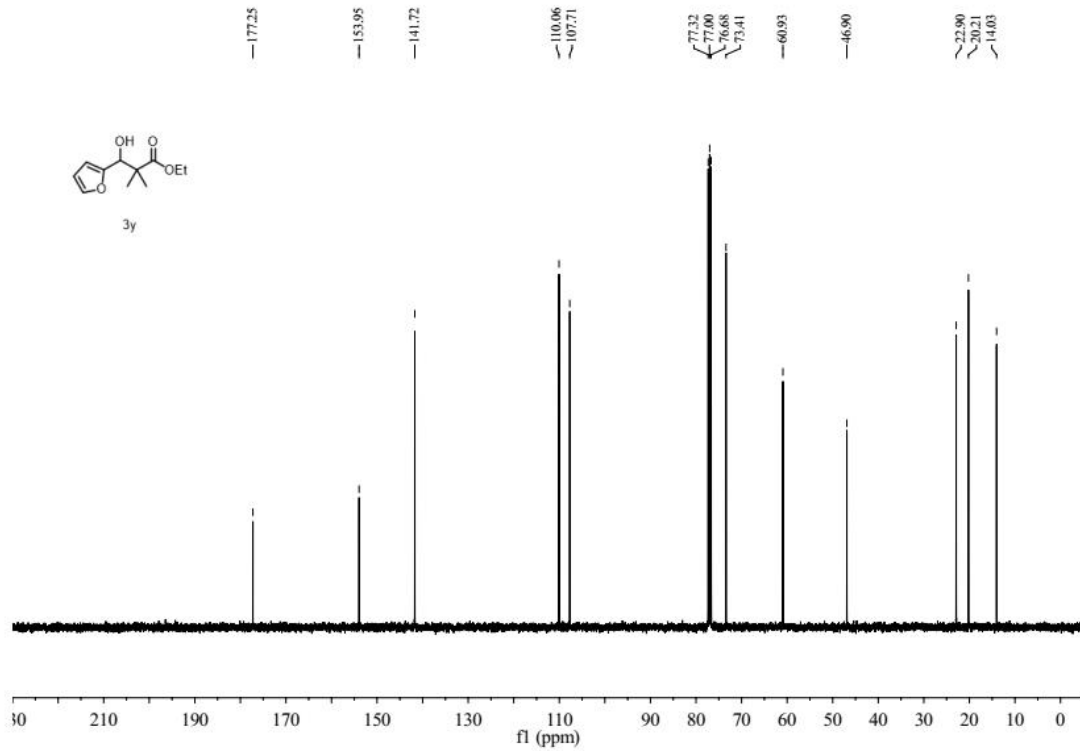

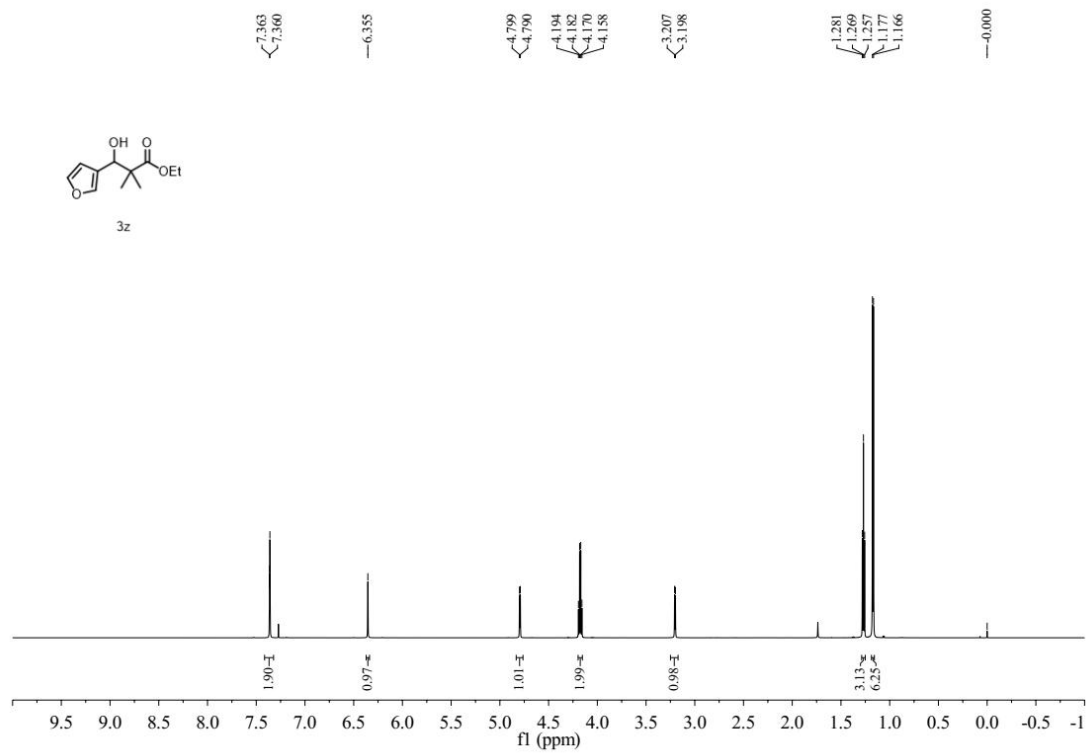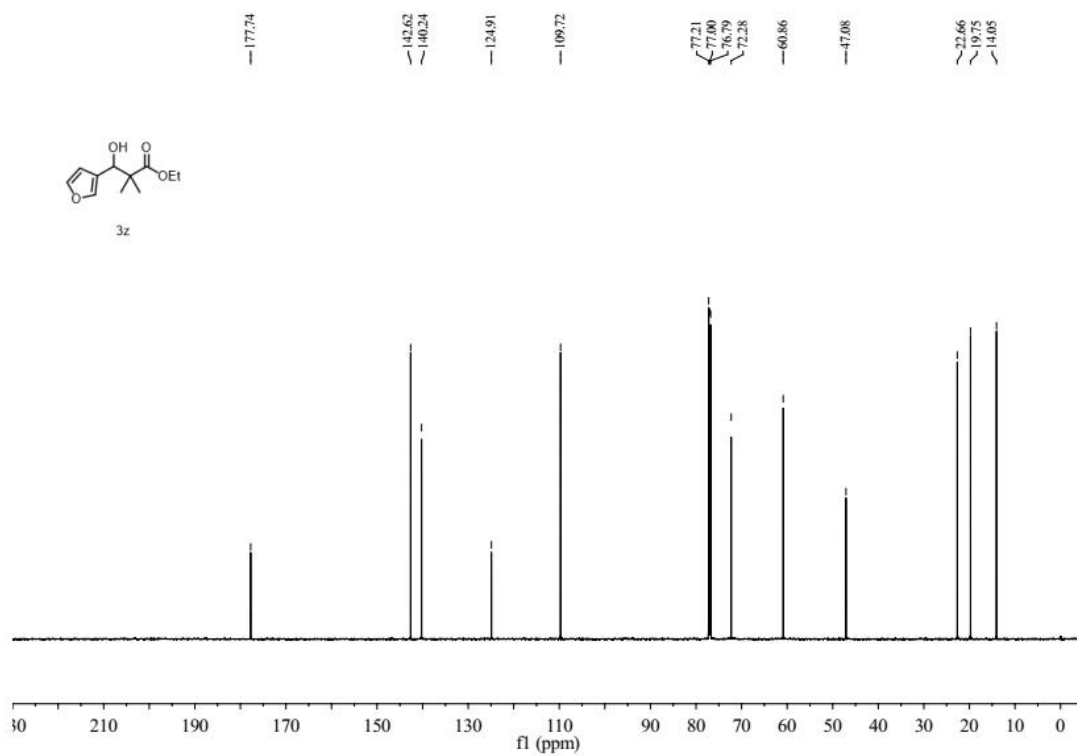

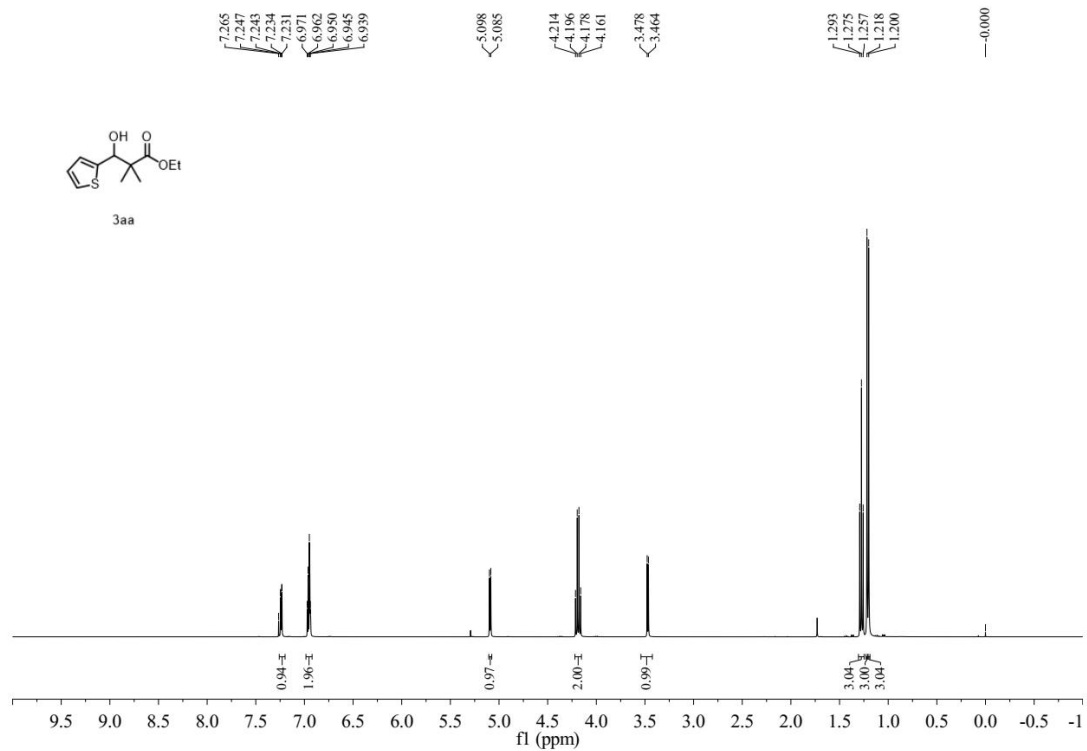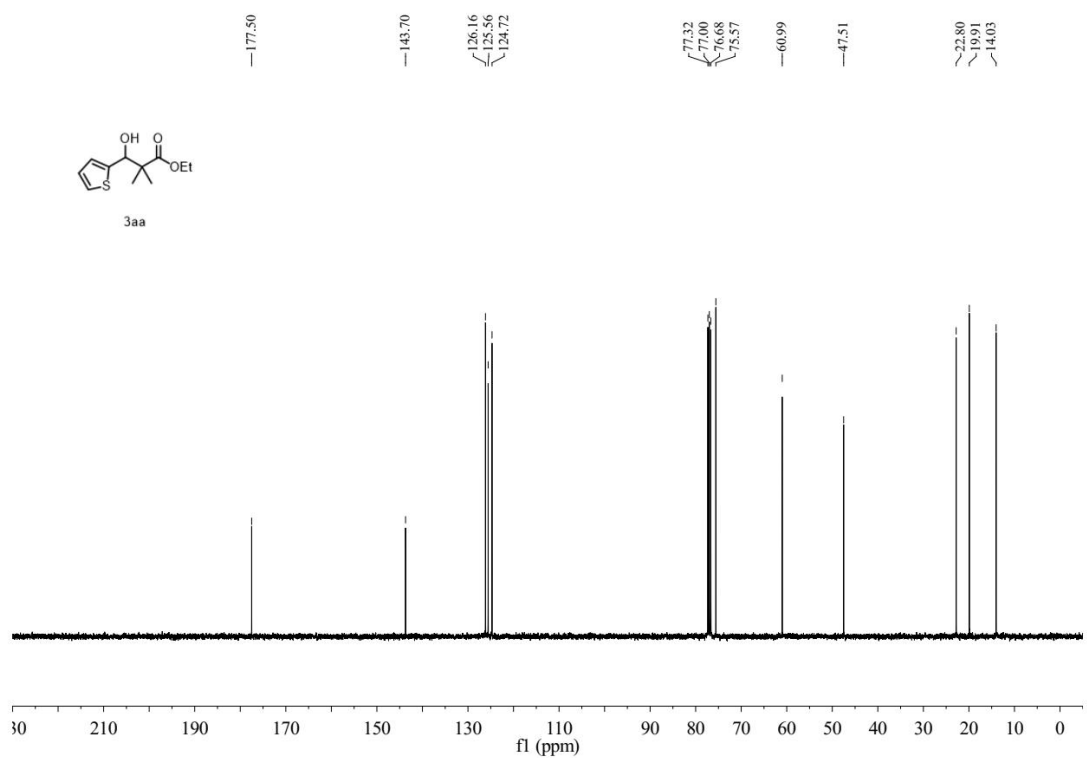

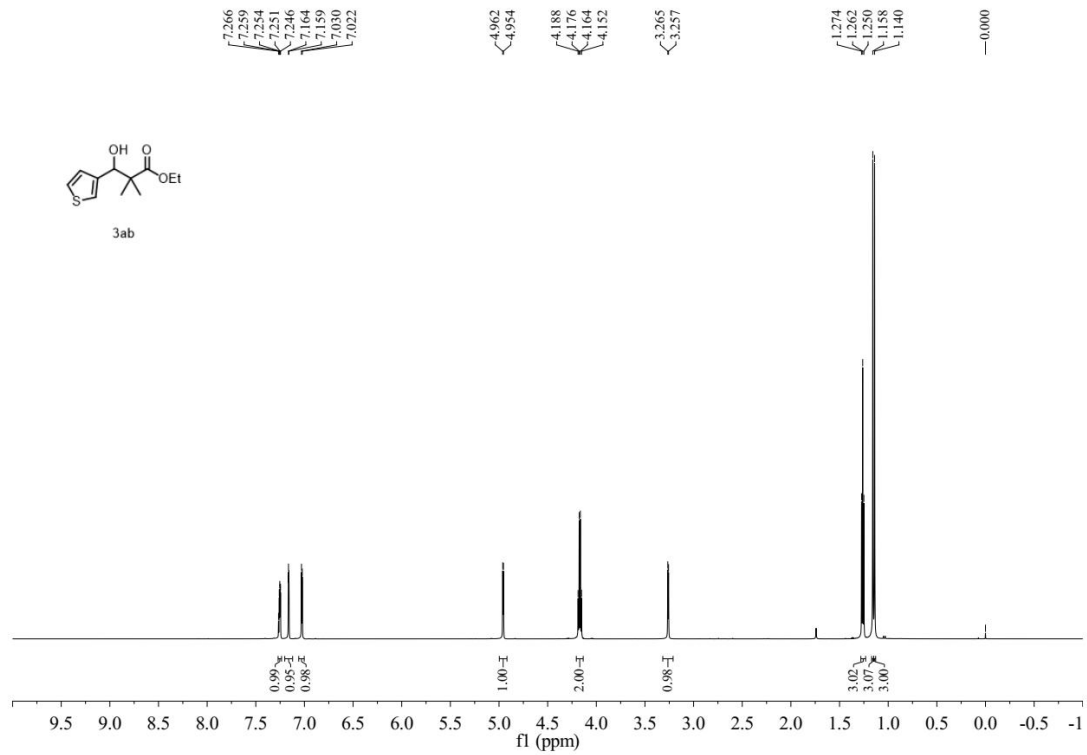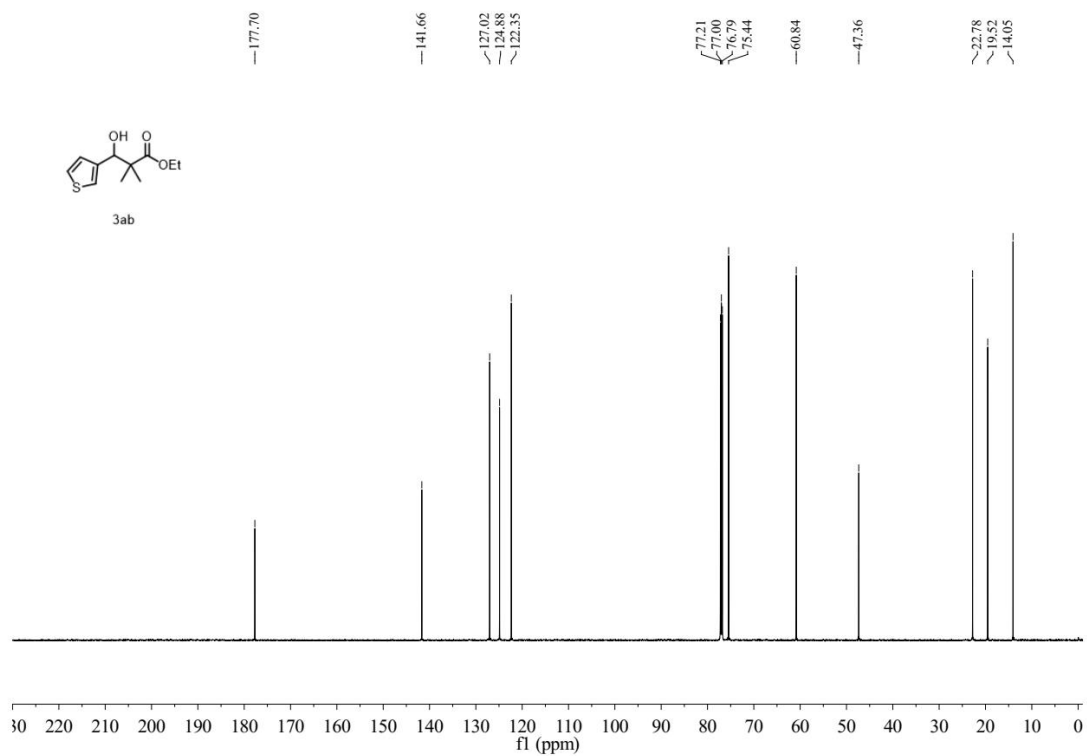

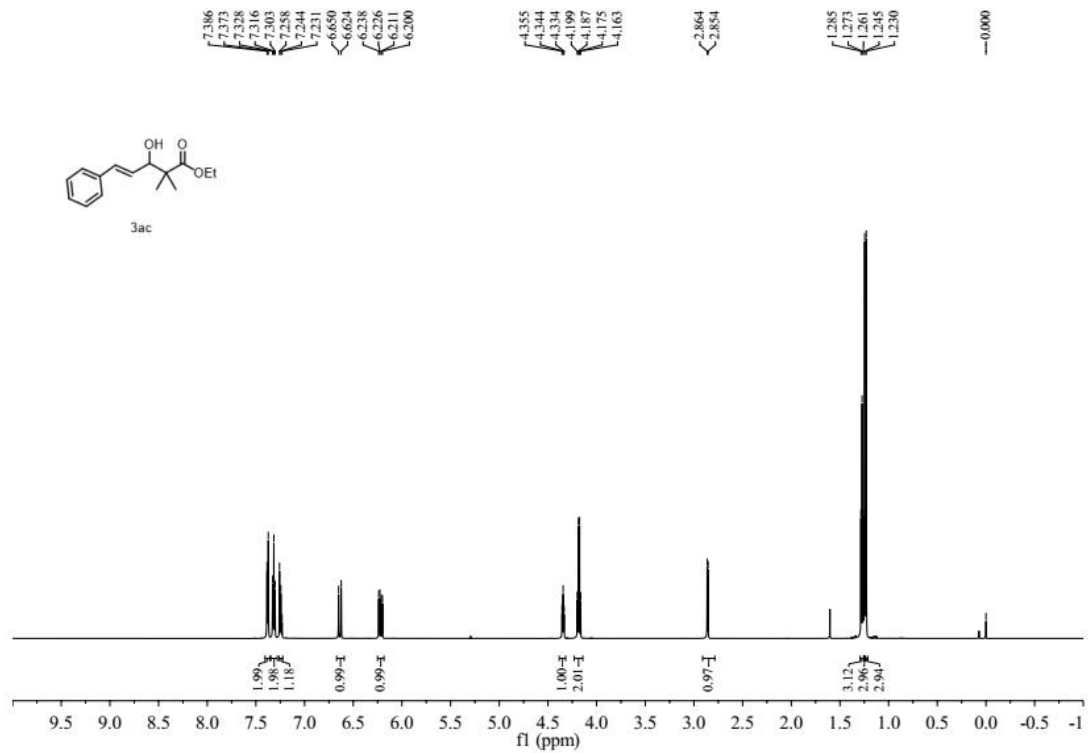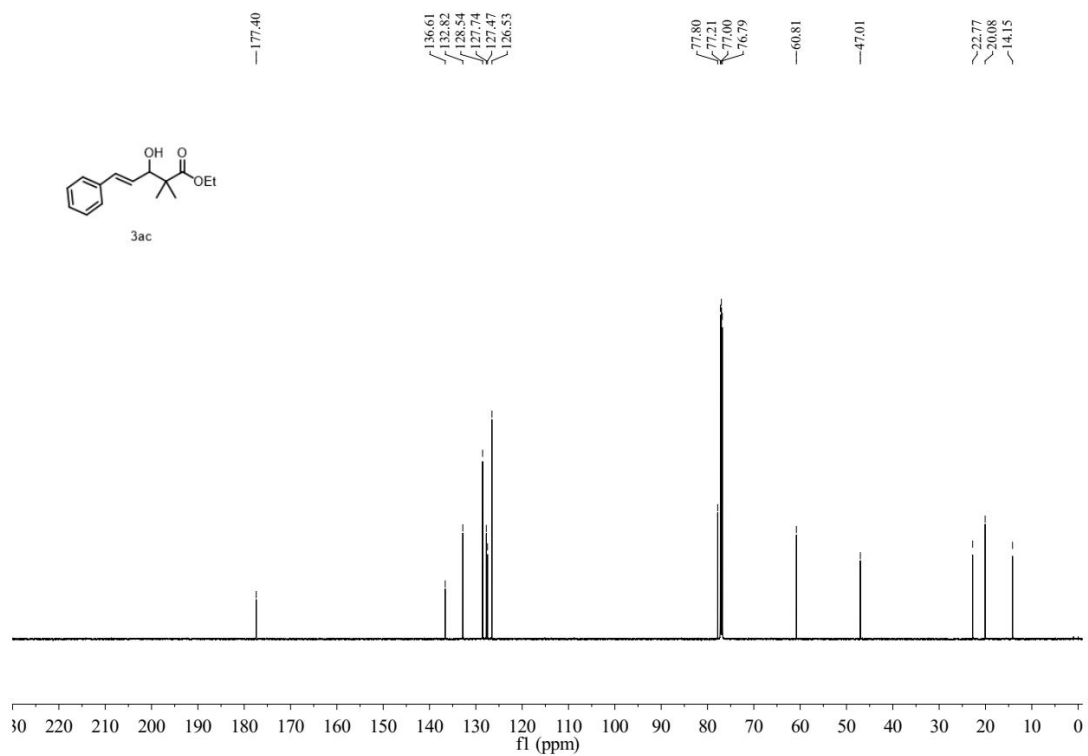

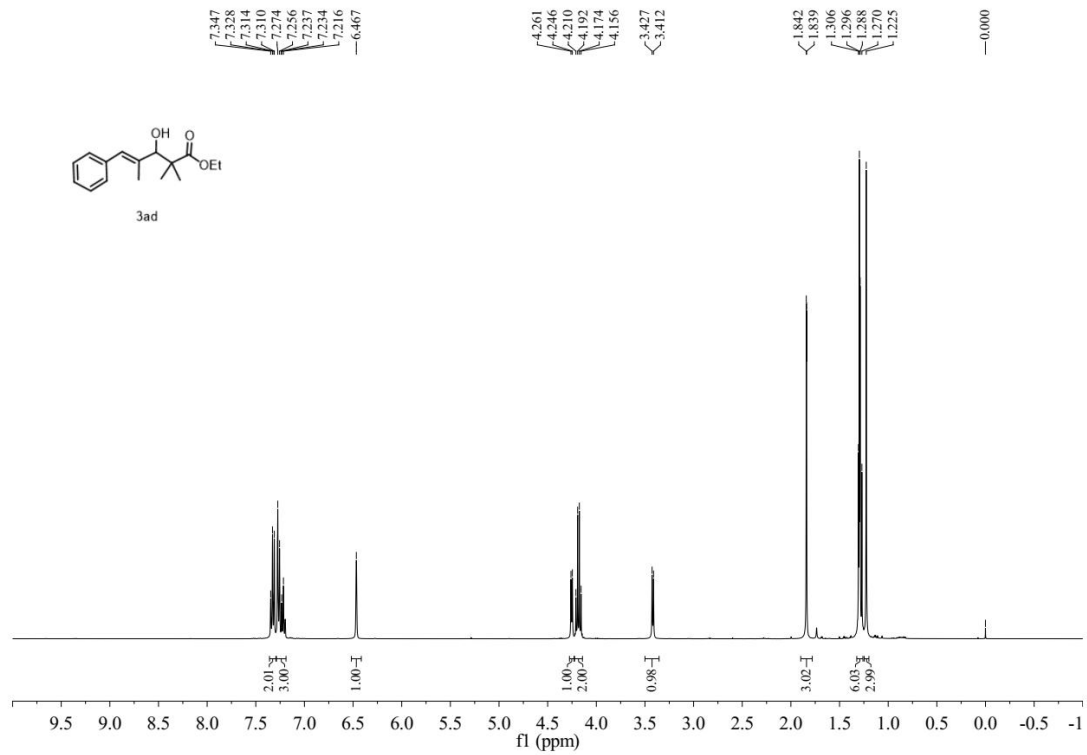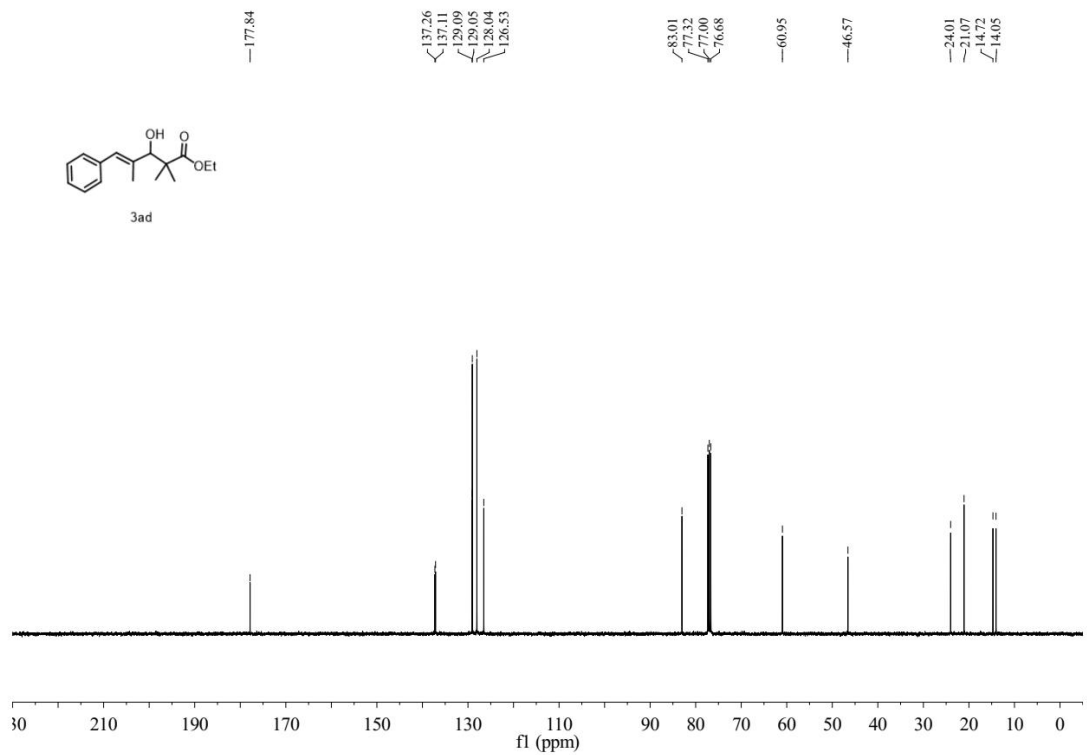

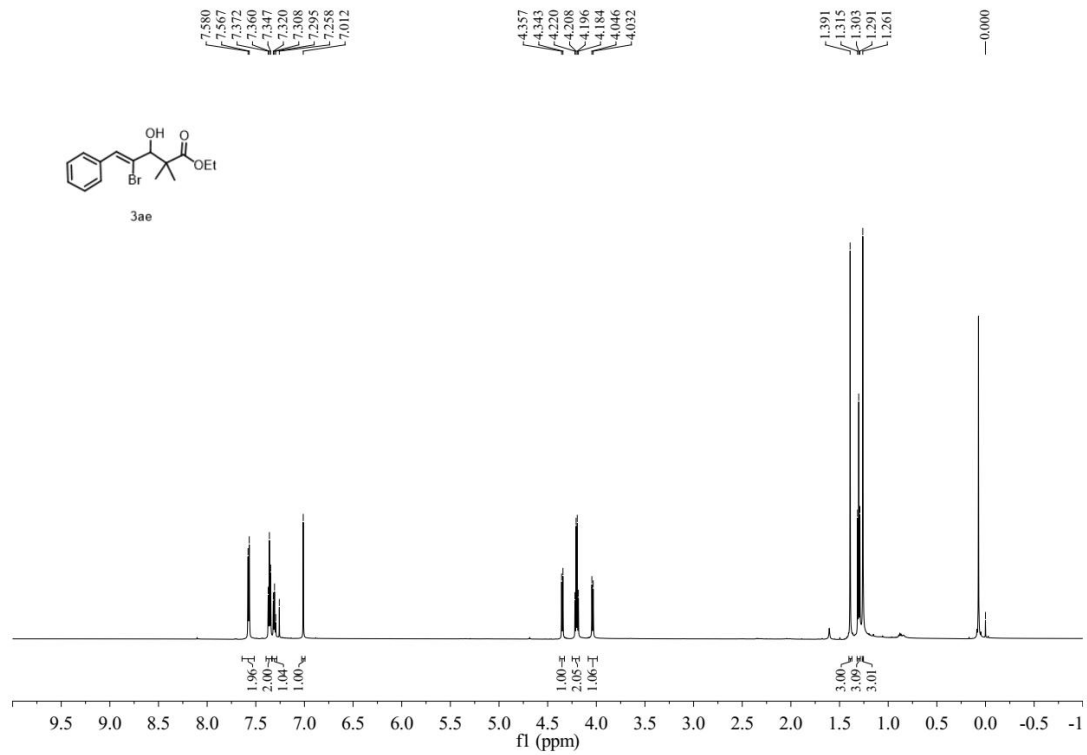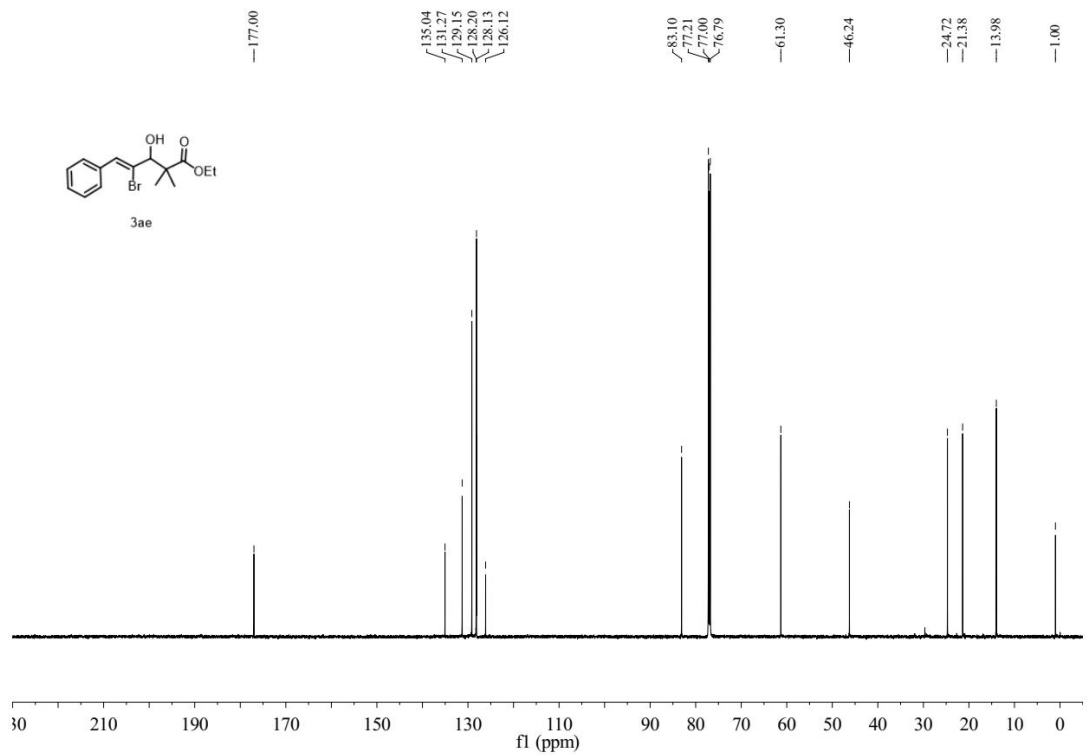

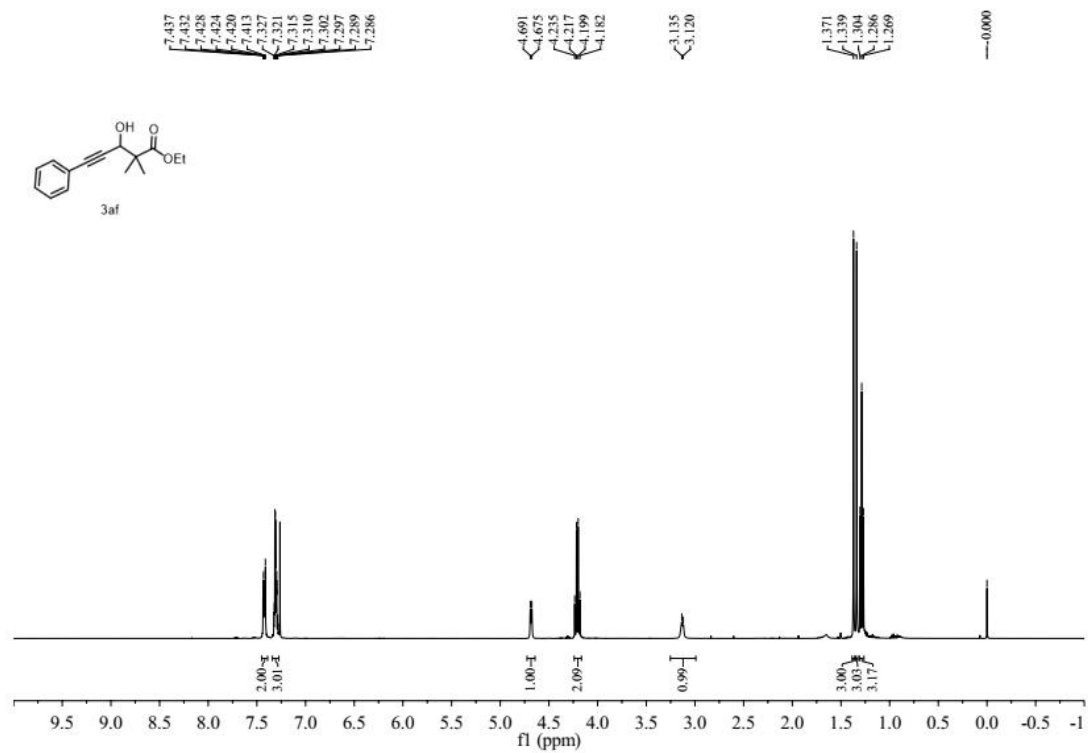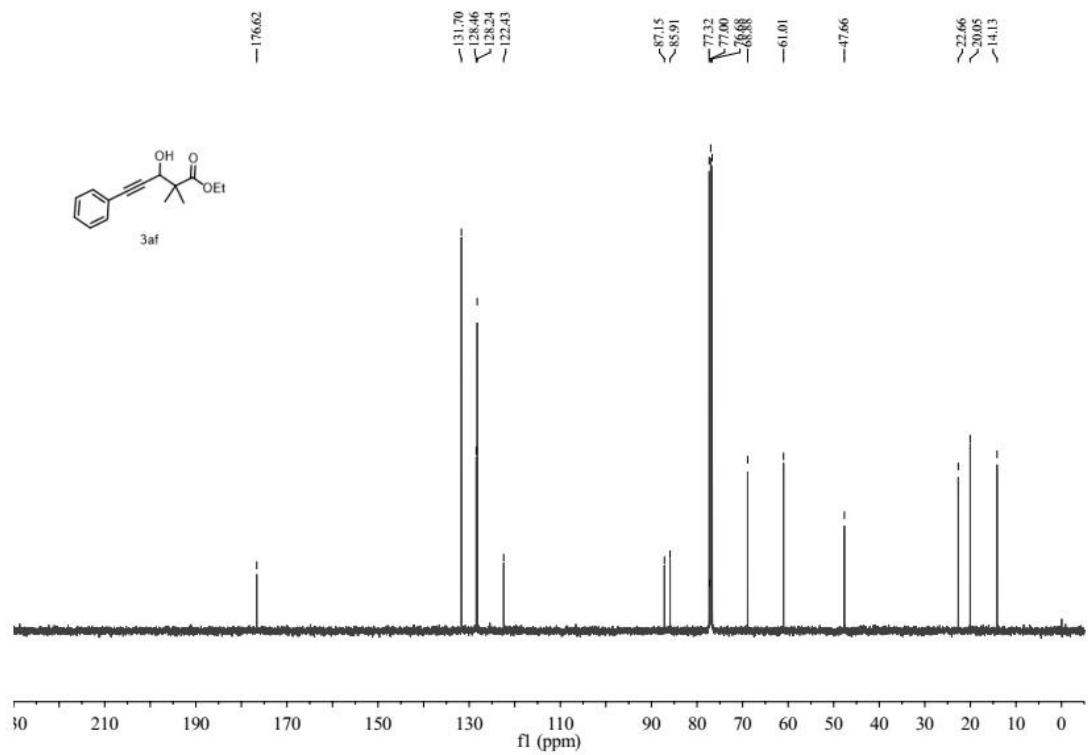



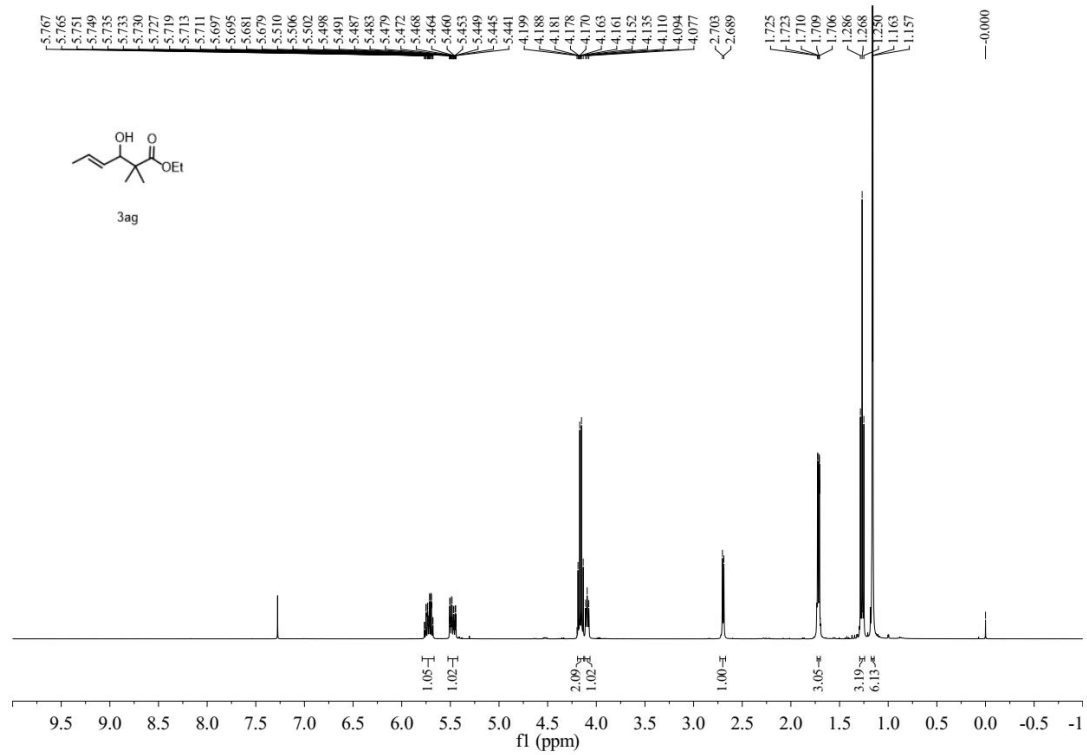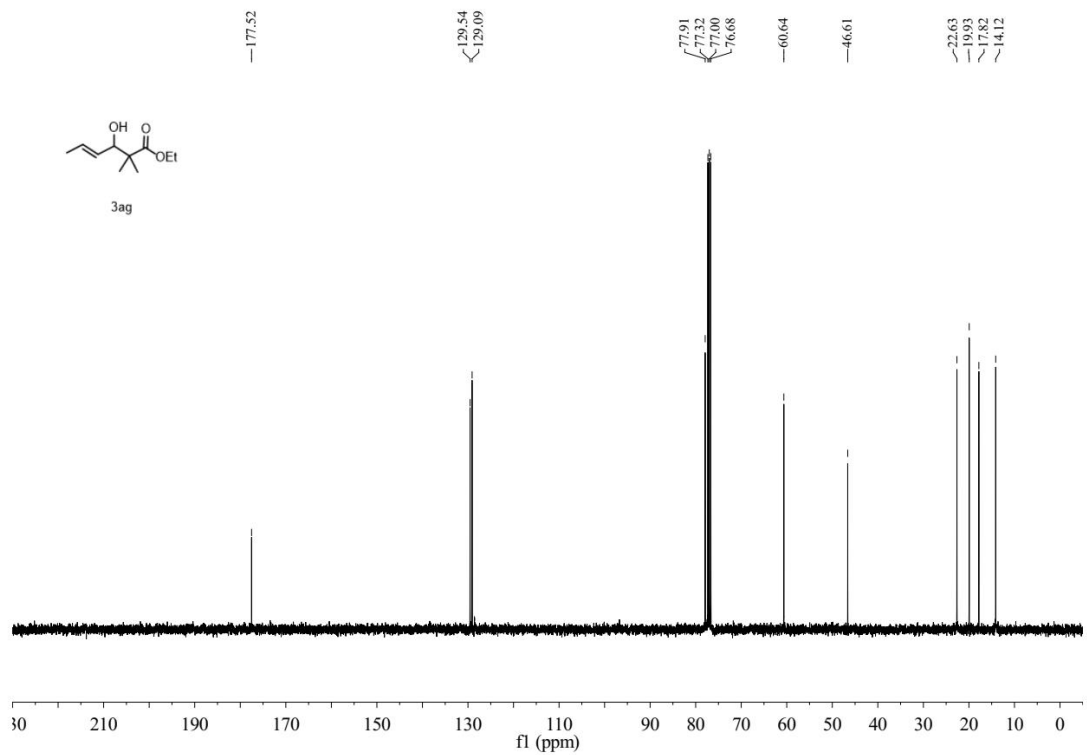

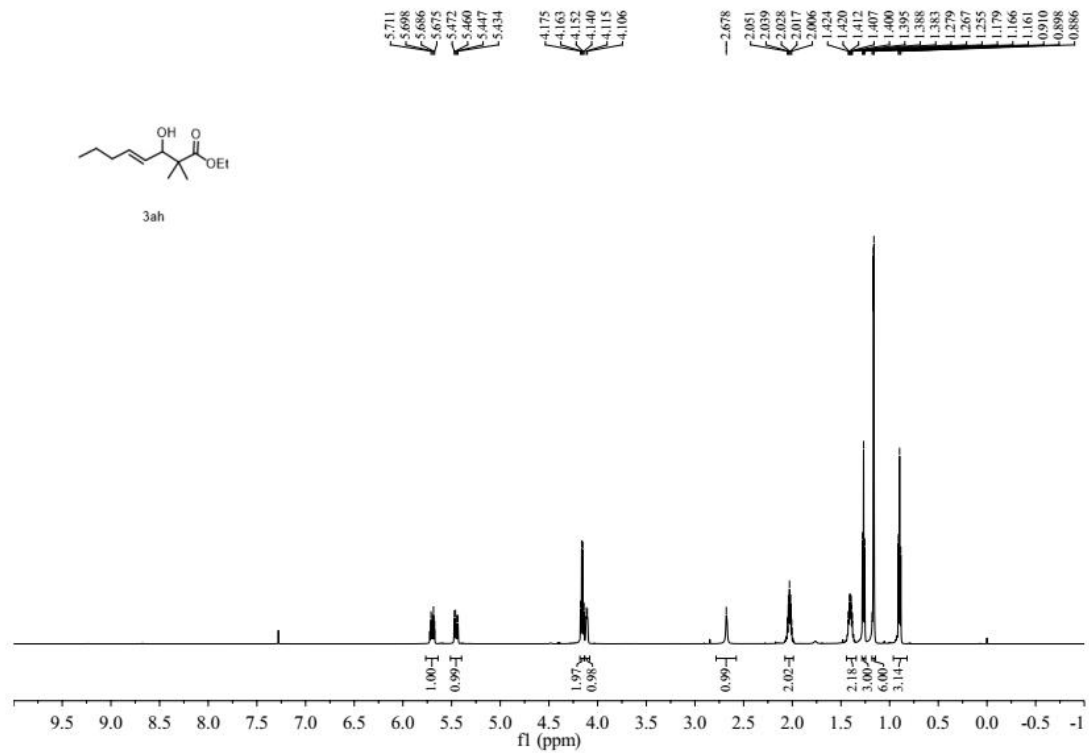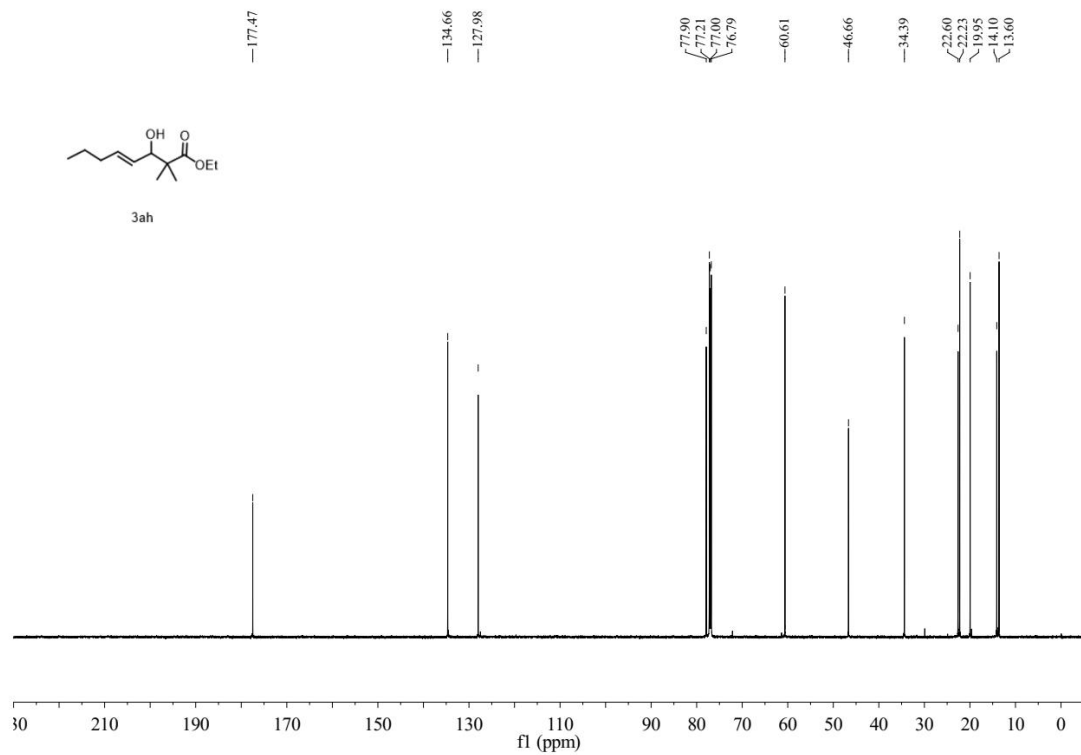

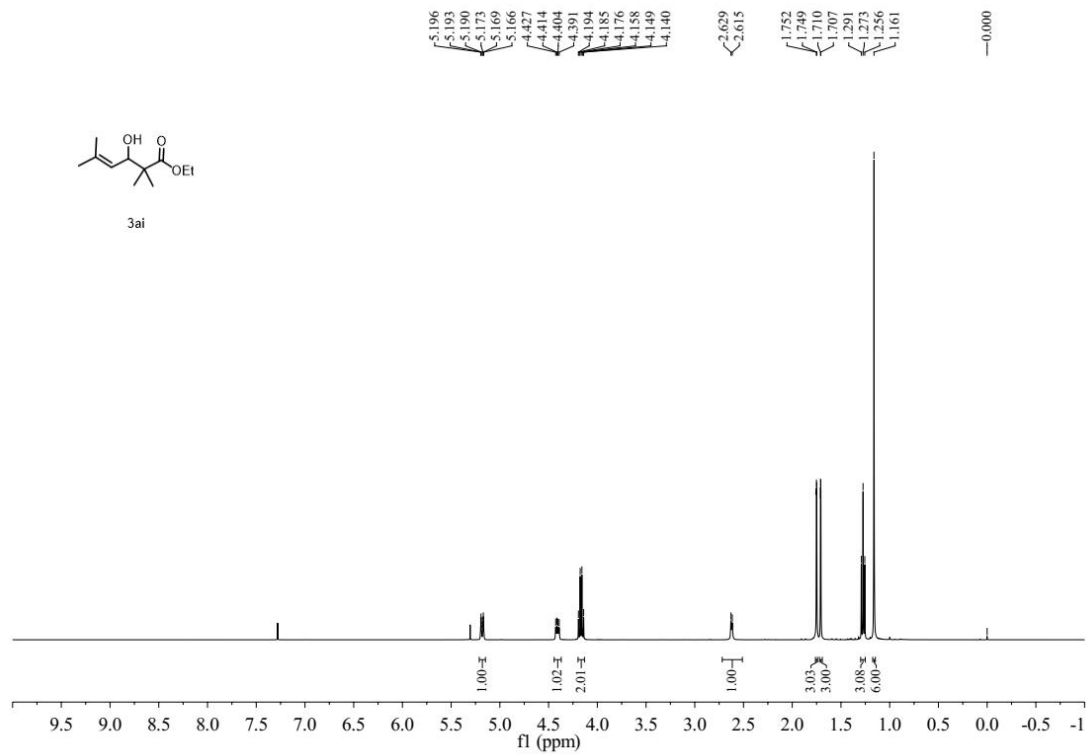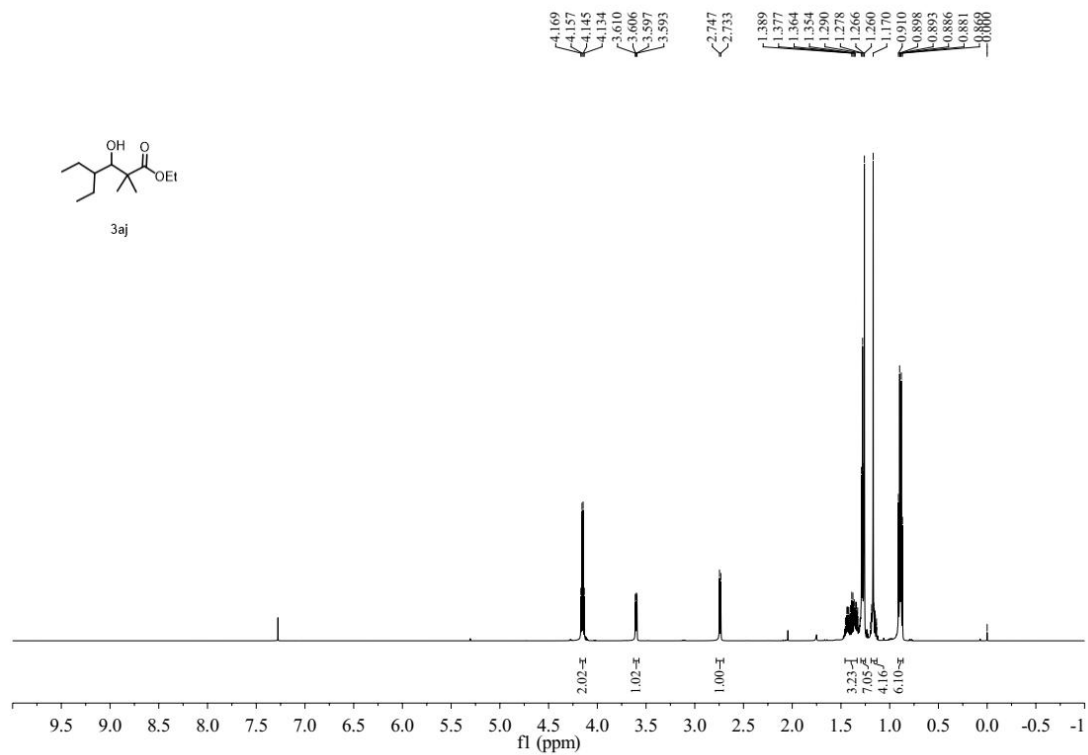

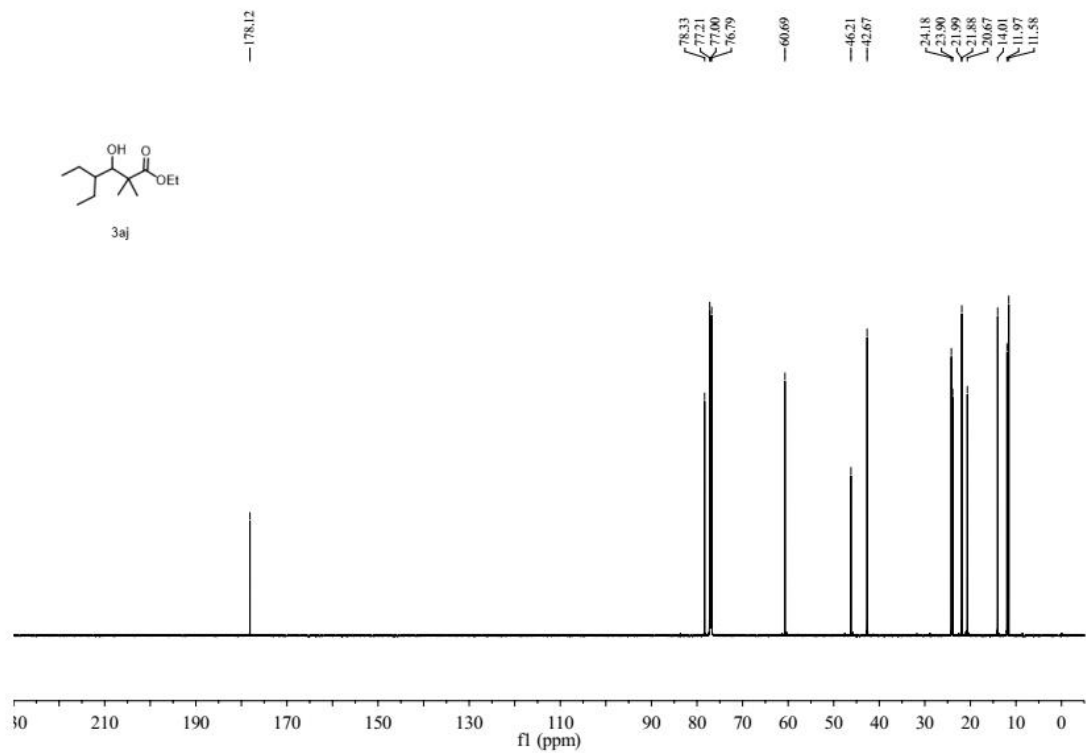

4.193  
4.176  
4.158  
4.140  
3.765  
3.754  
3.738  
3.727  
3.729  
2.713  
2.474  
2.468  
2.461  
2.455  
2.448  
2.445  
2.438  
2.432  
2.425  
2.419  
2.413  
2.406  
2.388  
2.381  
2.369  
2.367  
2.363  
2.361  
2.349  
2.342  
2.327  
2.325  
2.321  
2.318  
1.977  
1.970  
1.964  
1.959  
1.734  
1.734  
1.718  
1.714  
1.705  
1.699  
1.694  
1.684  
1.681  
1.665  
1.660  
1.565  
1.552  
1.547  
1.538  
1.534  
1.532  
1.525  
1.520  
1.513  
1.507  
1.504  
1.500  
1.491  
1.486  
1.473  
1.293  
1.275  
1.258  
1.212  
1.181  
0.000

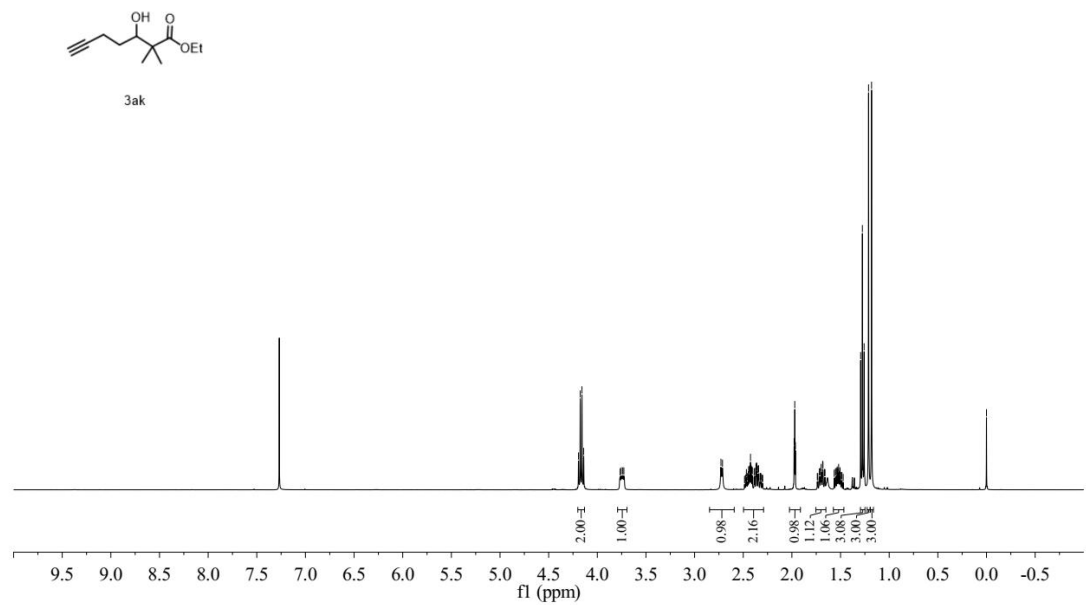

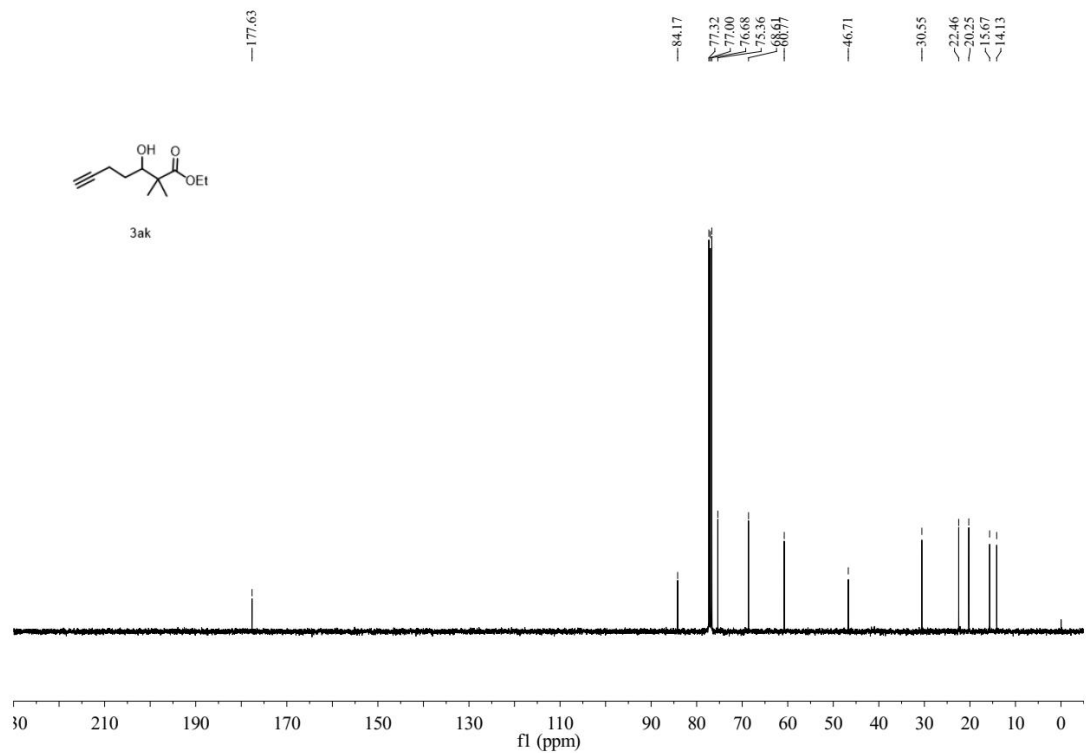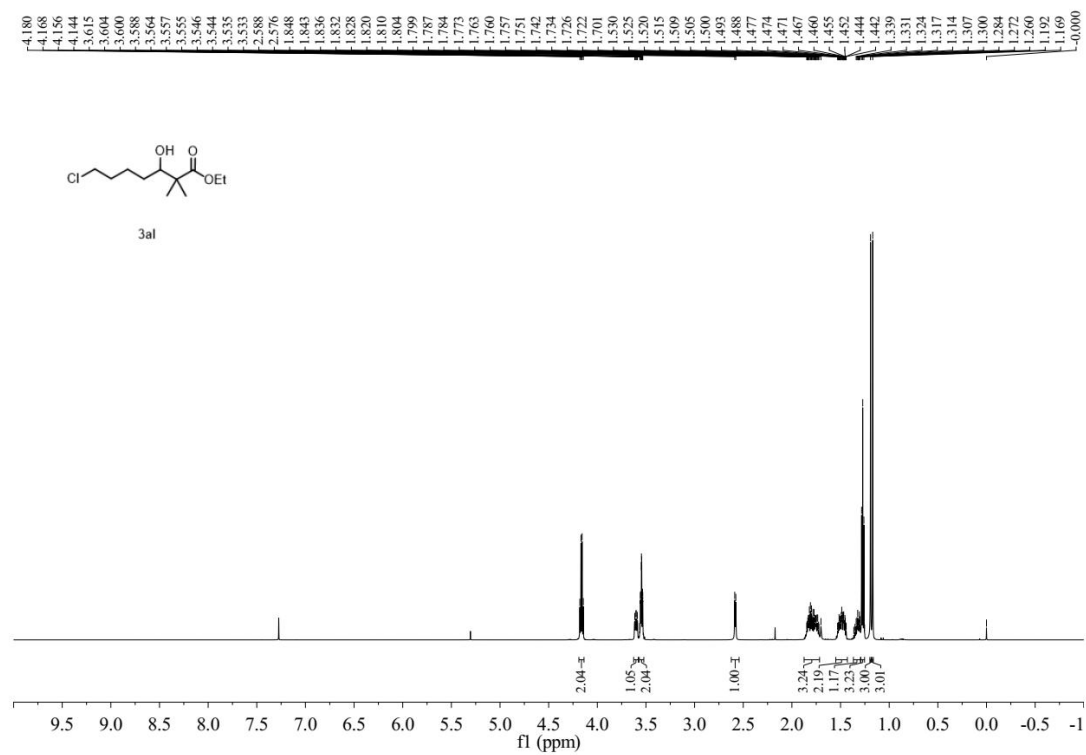

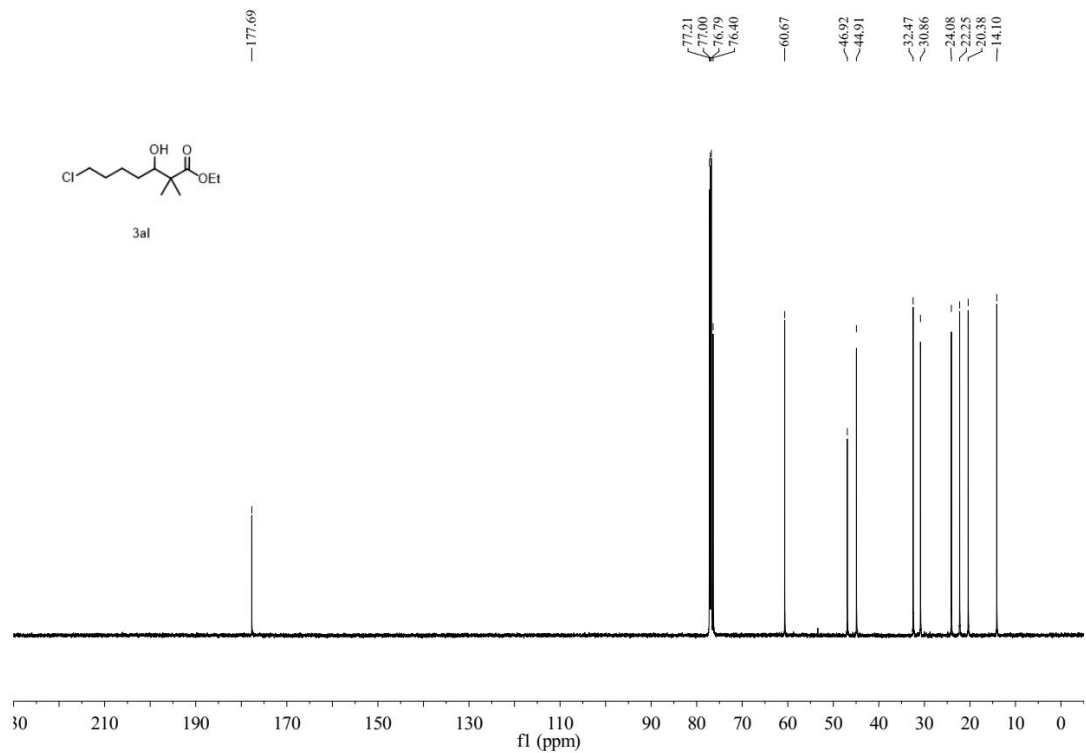

4.190  
4.172  
4.154  
4.137  
3.623  
3.618  
3.608  
3.600  
3.596  
3.592  
3.579  
3.575  
3.444  
3.437  
3.433  
3.427  
3.420  
3.417  
3.409  
3.403  
3.400  
3.392  
2.554  
2.537  
1.944  
1.927  
1.921  
1.912  
1.904  
1.895  
1.888  
1.883  
1.869  
1.852  
1.776  
1.767  
1.762  
1.733  
1.728  
1.729  
1.725  
1.719  
1.714  
1.548  
1.540  
1.533  
1.525  
1.517  
1.510  
1.502  
1.496  
1.489  
1.480  
1.474  
1.469  
1.459  
1.452  
1.446  
1.435  
1.430  
1.324  
1.321  
1.298  
1.291  
1.273  
1.255  
1.194  
1.168  
0.000

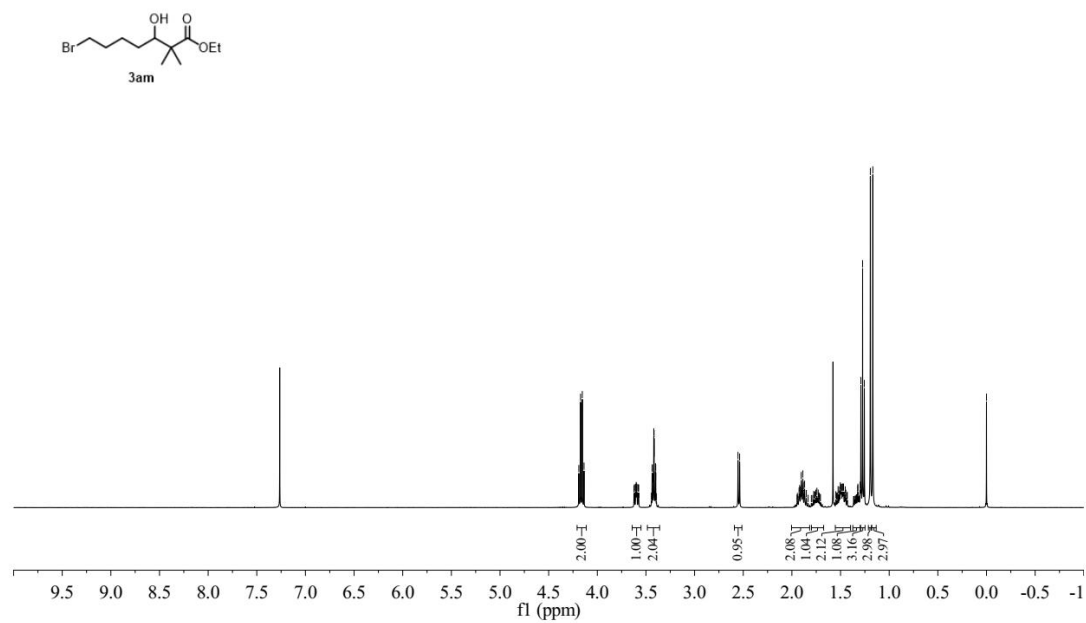

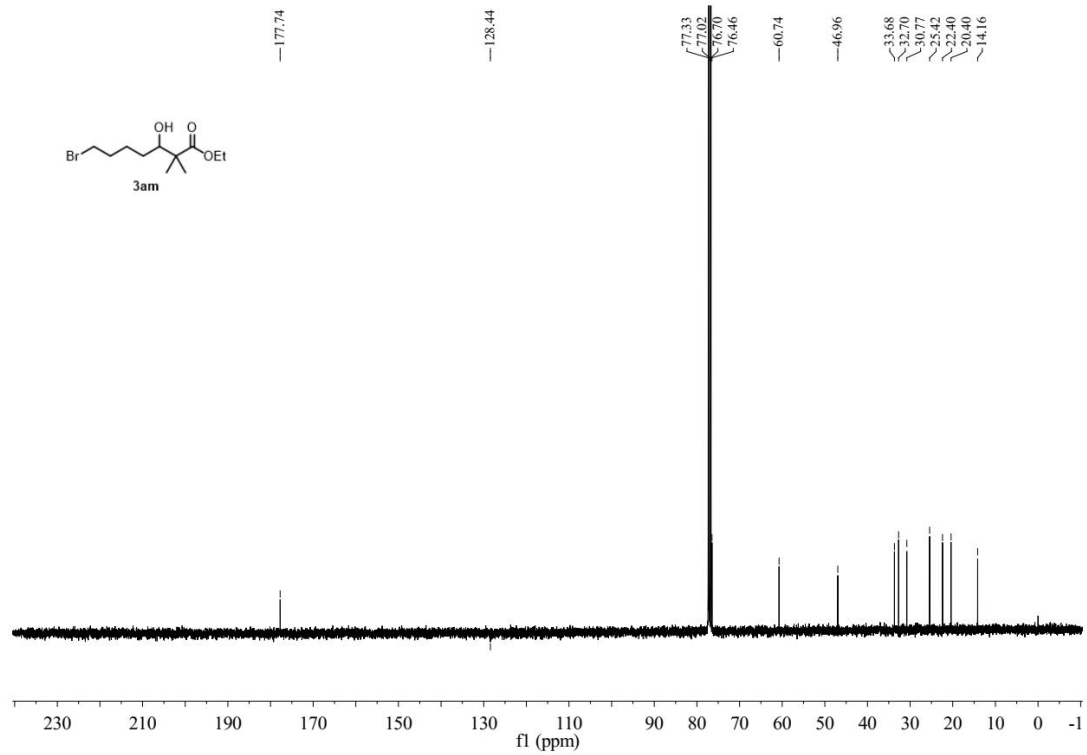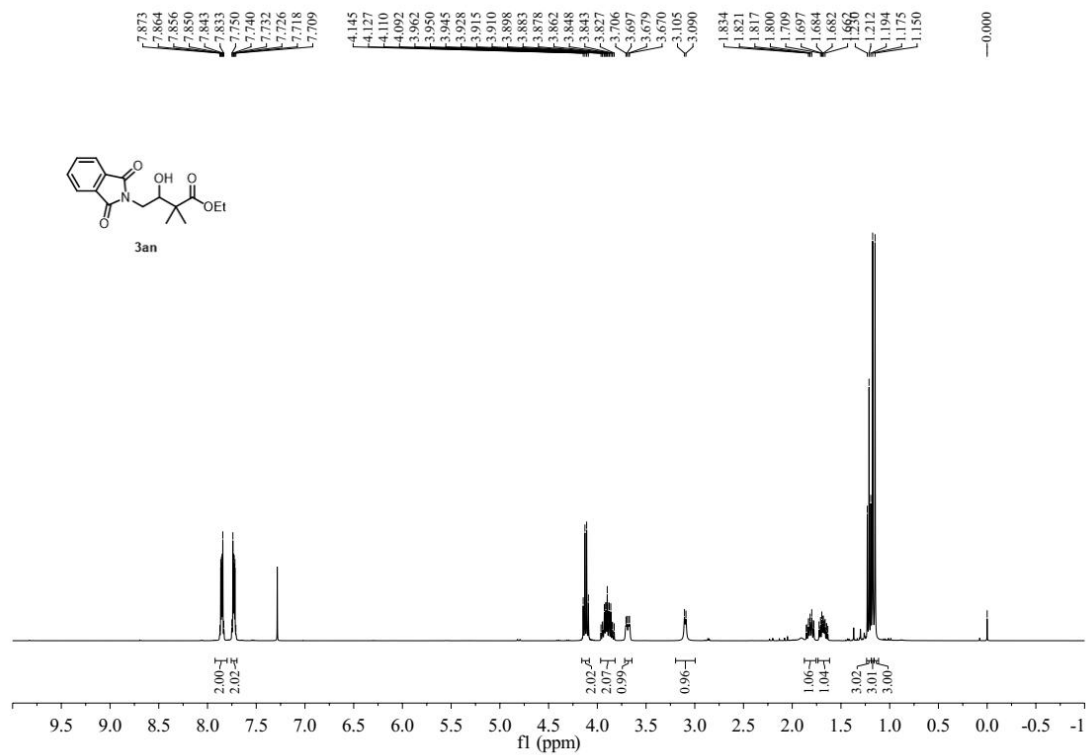

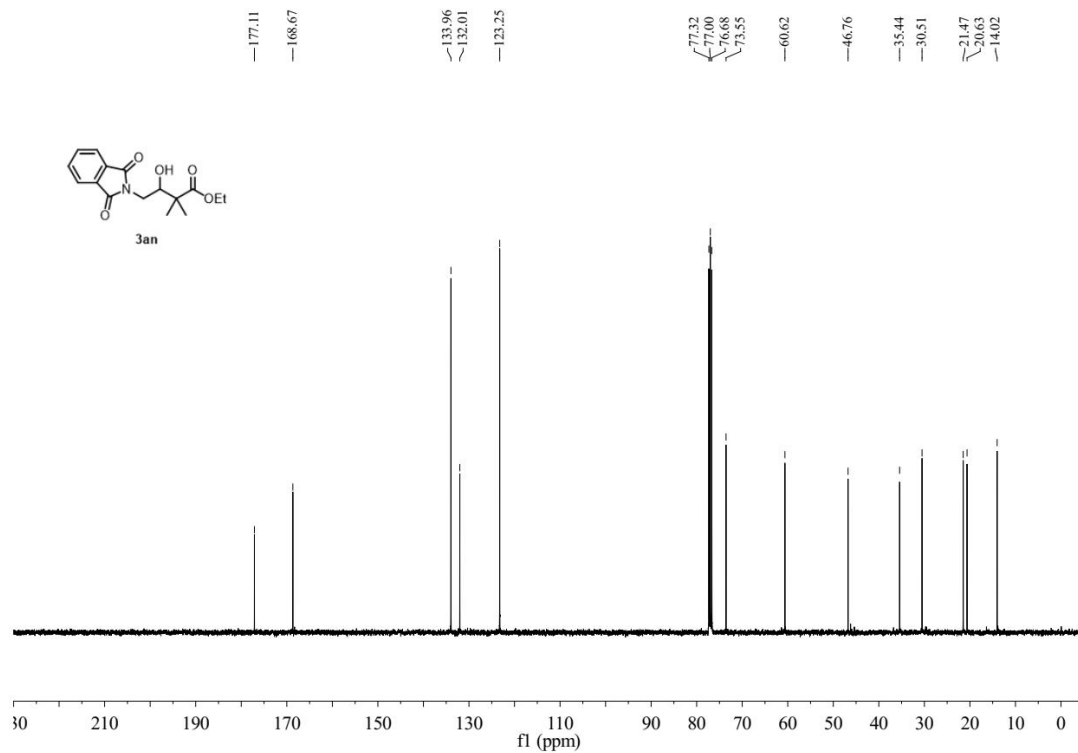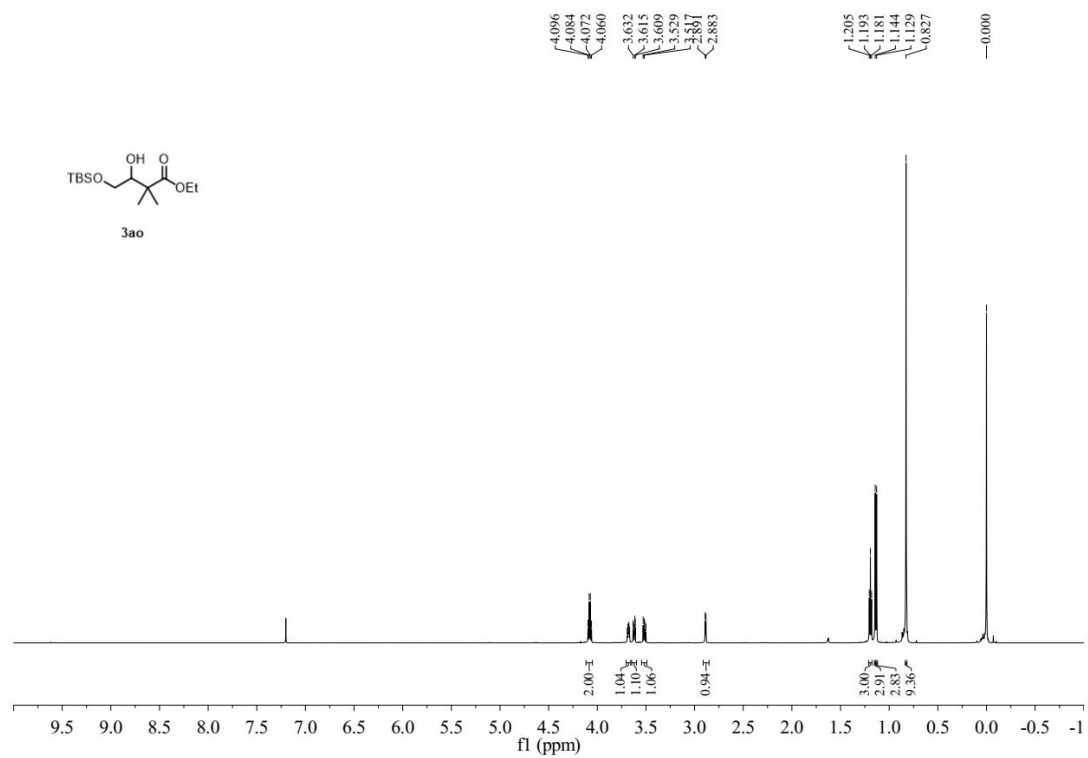



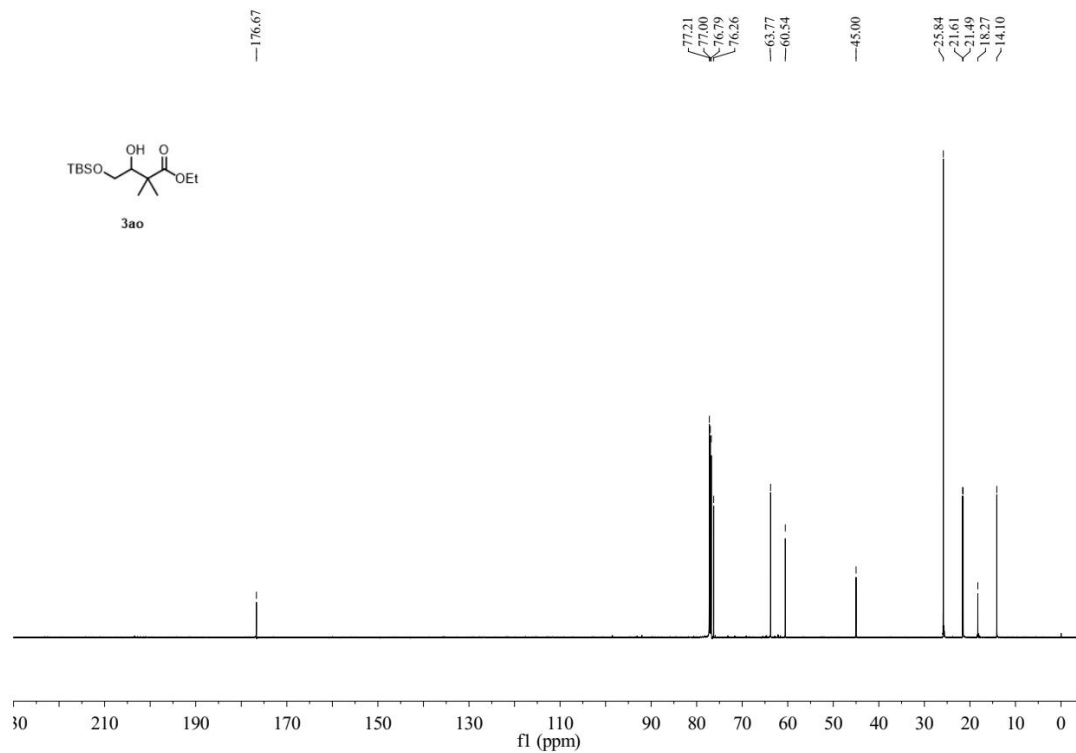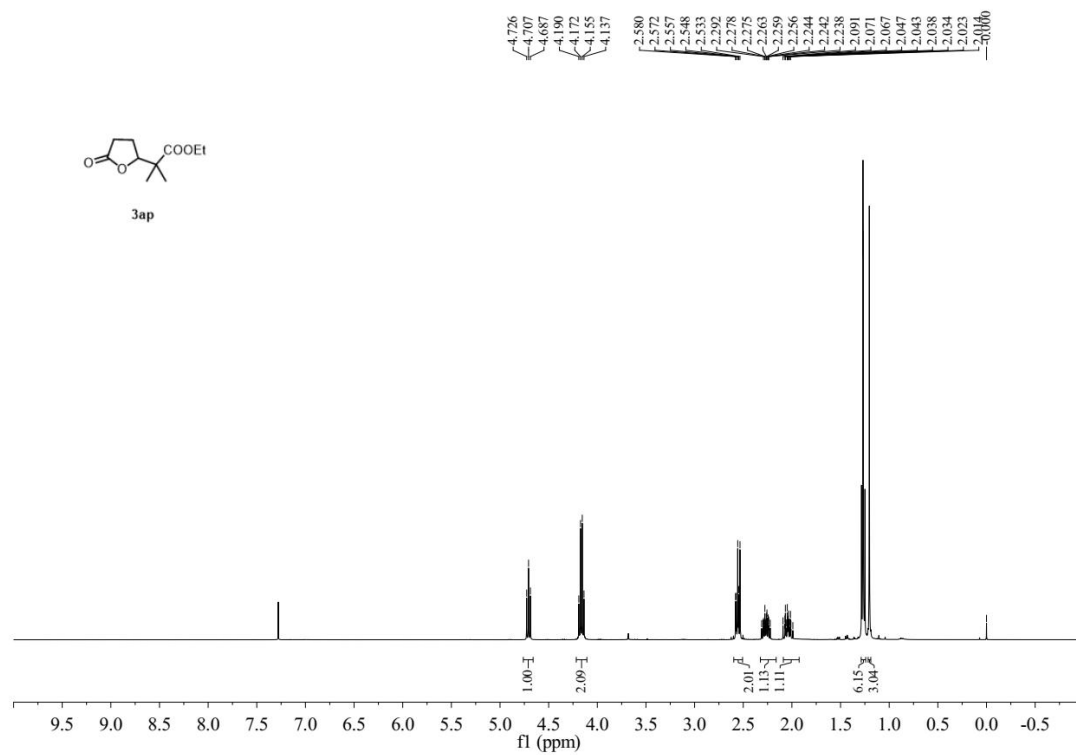

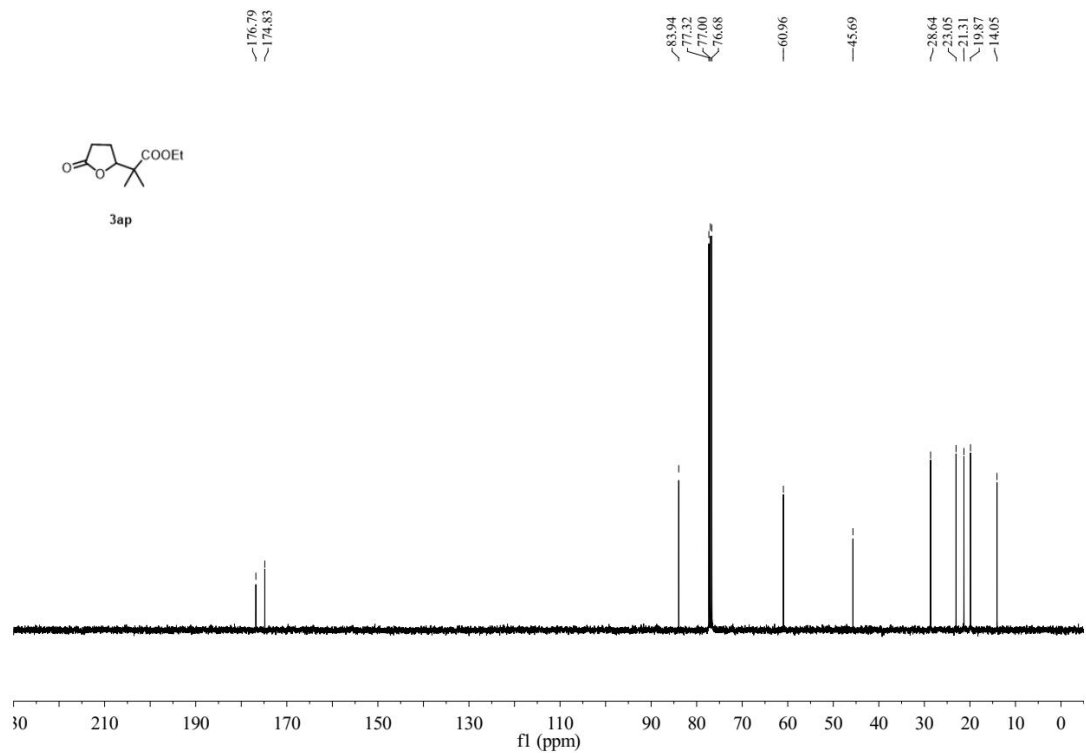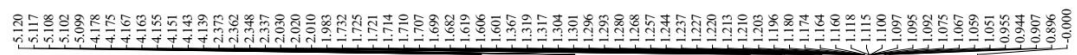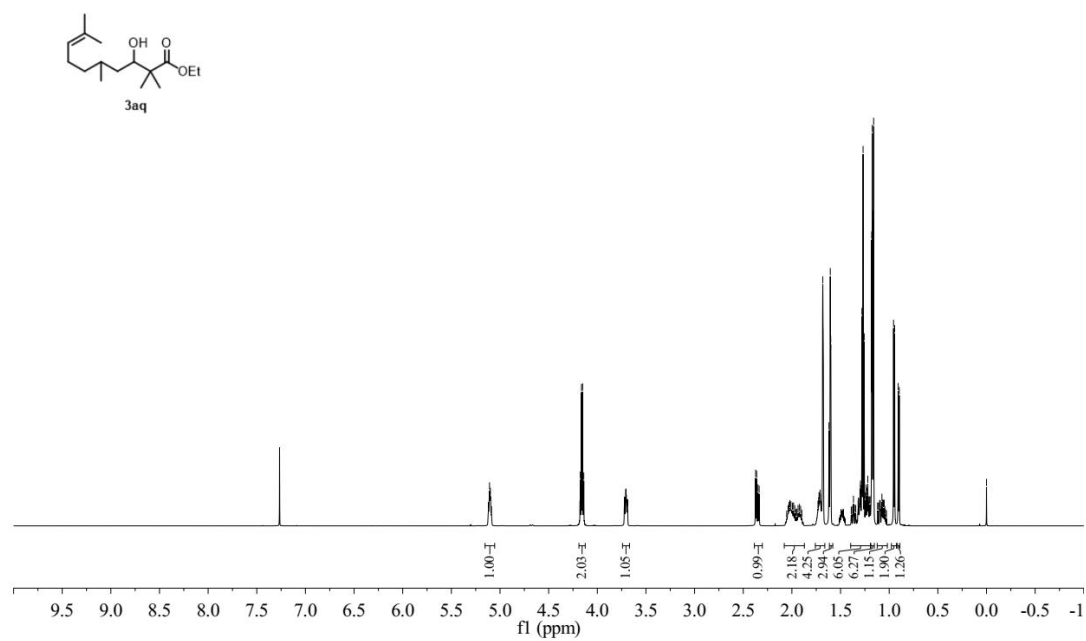

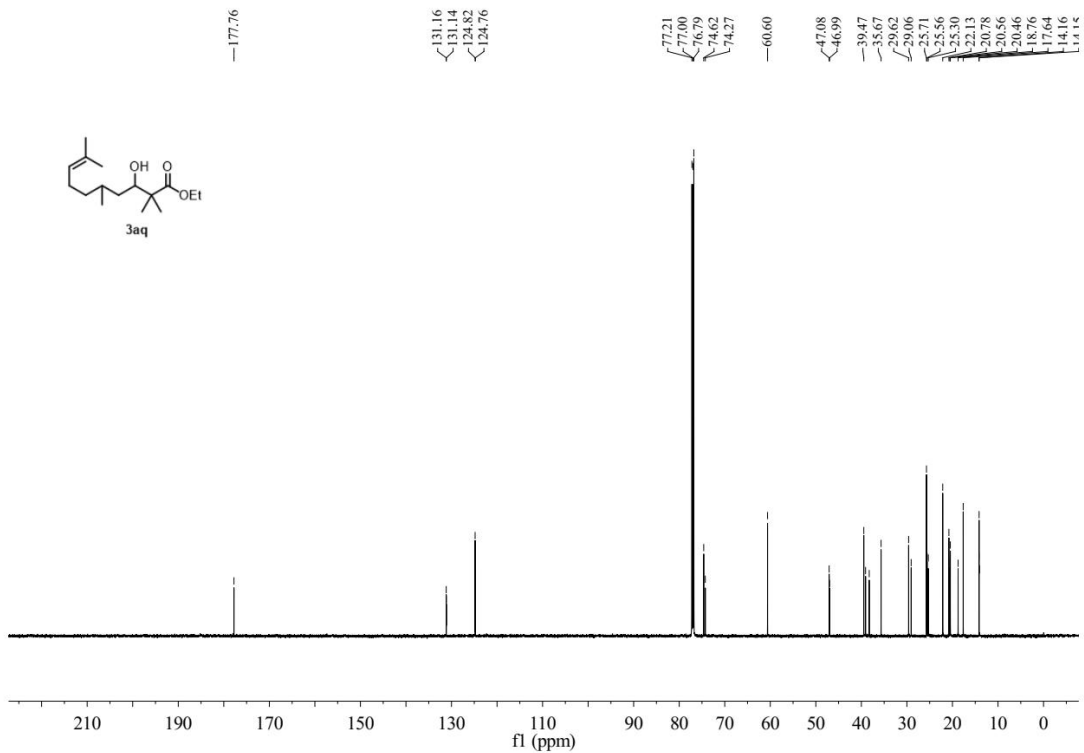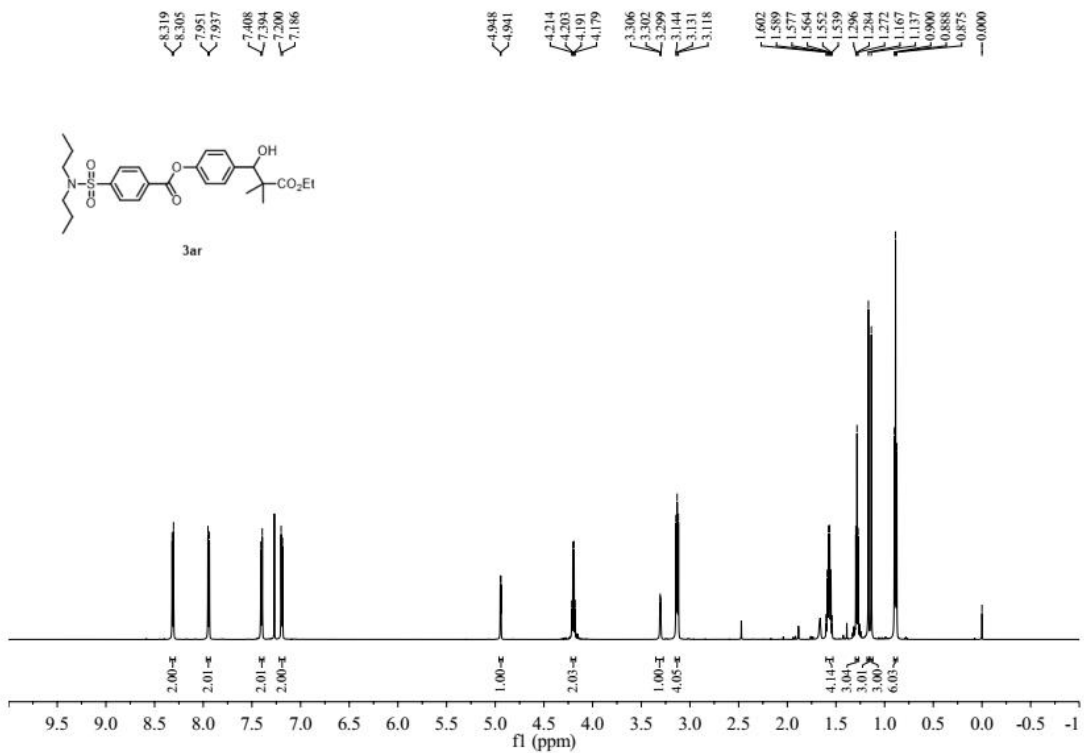

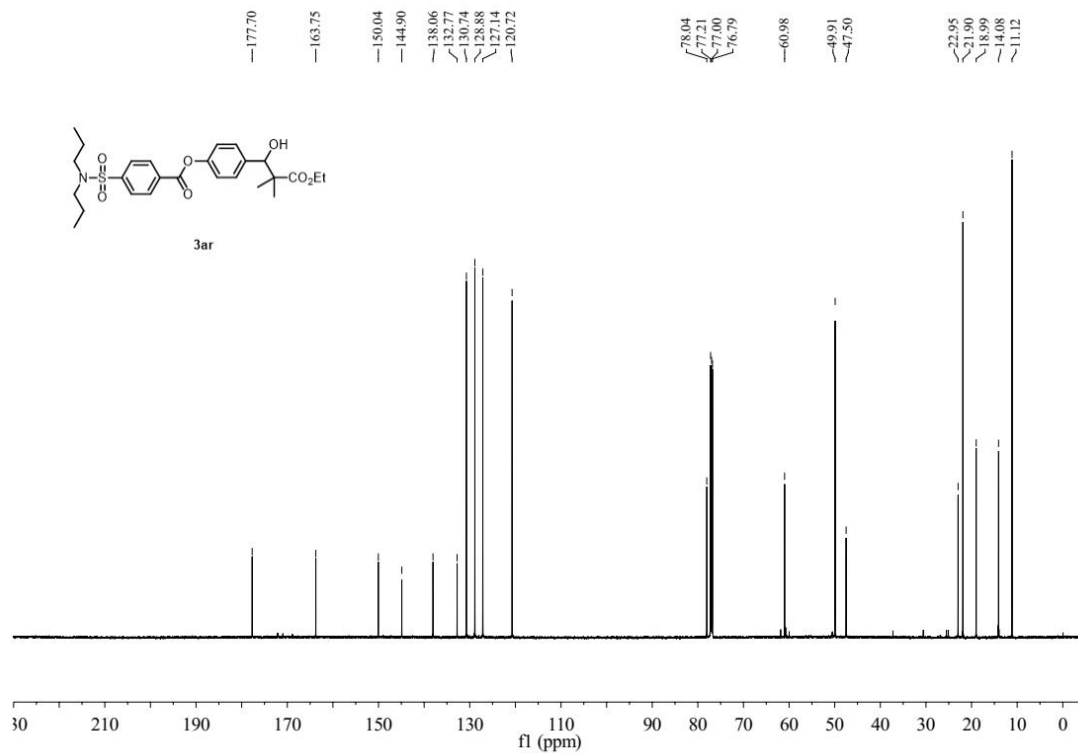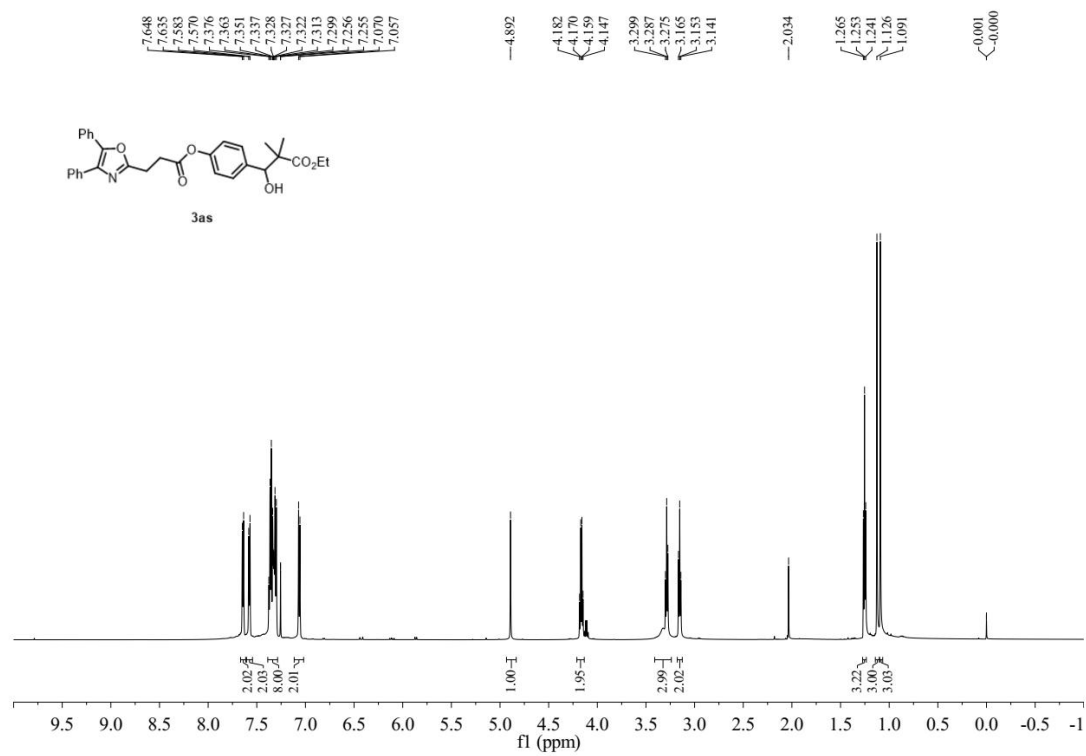

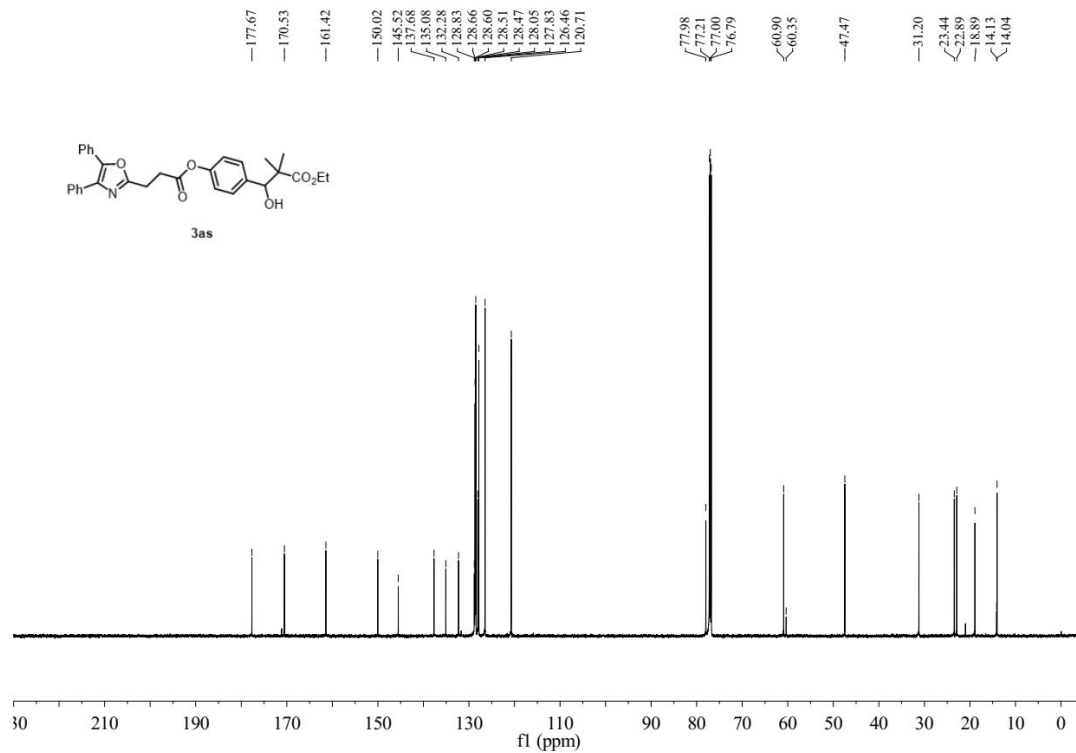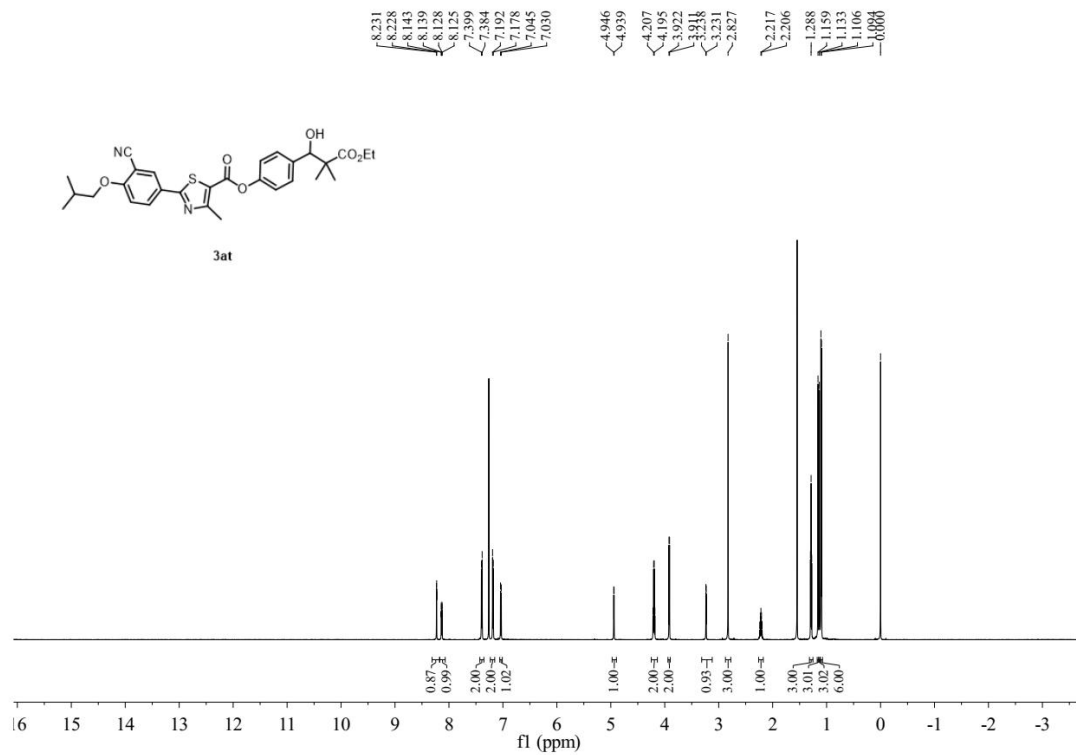



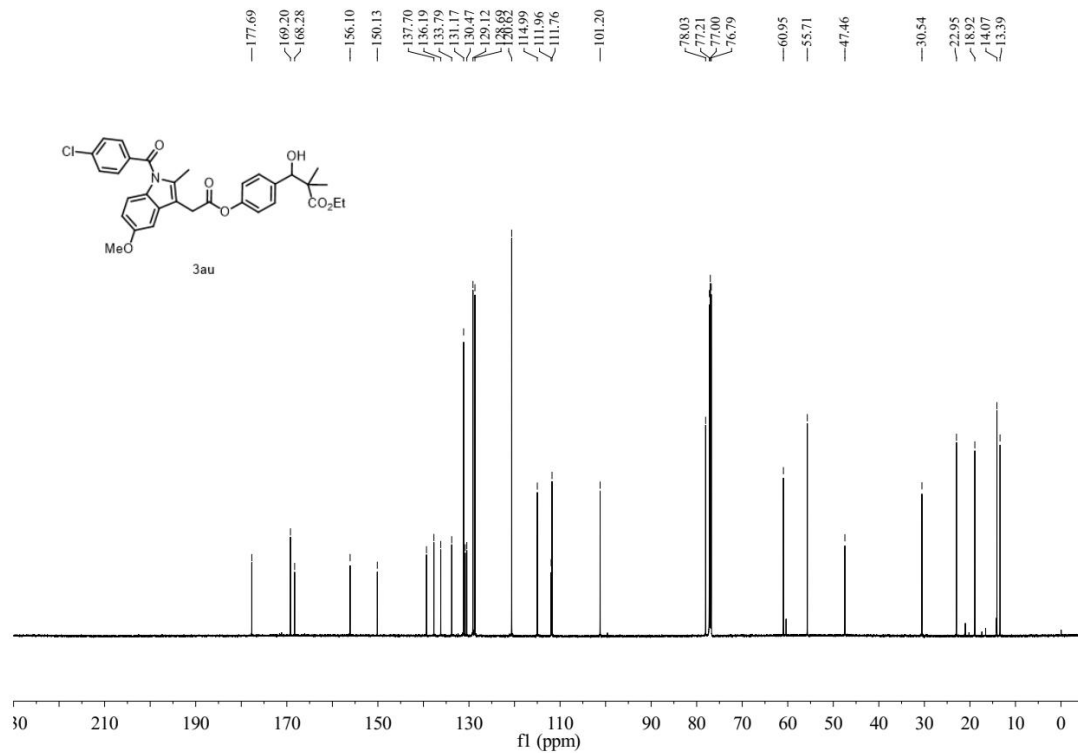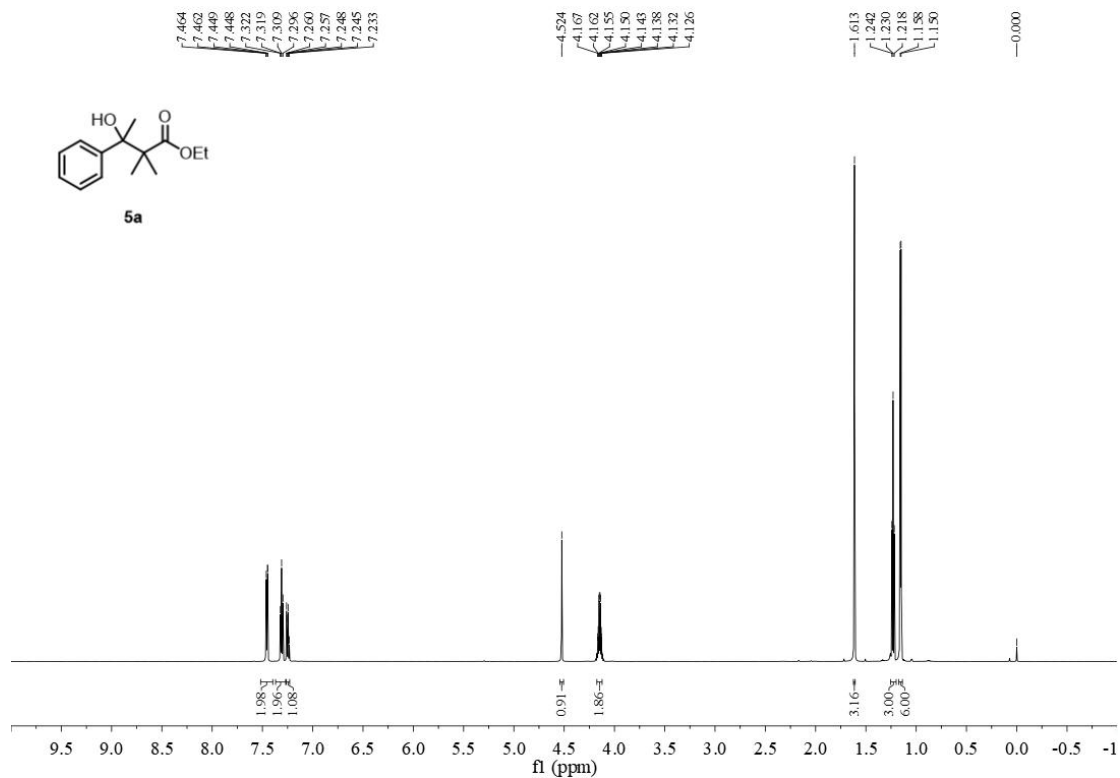

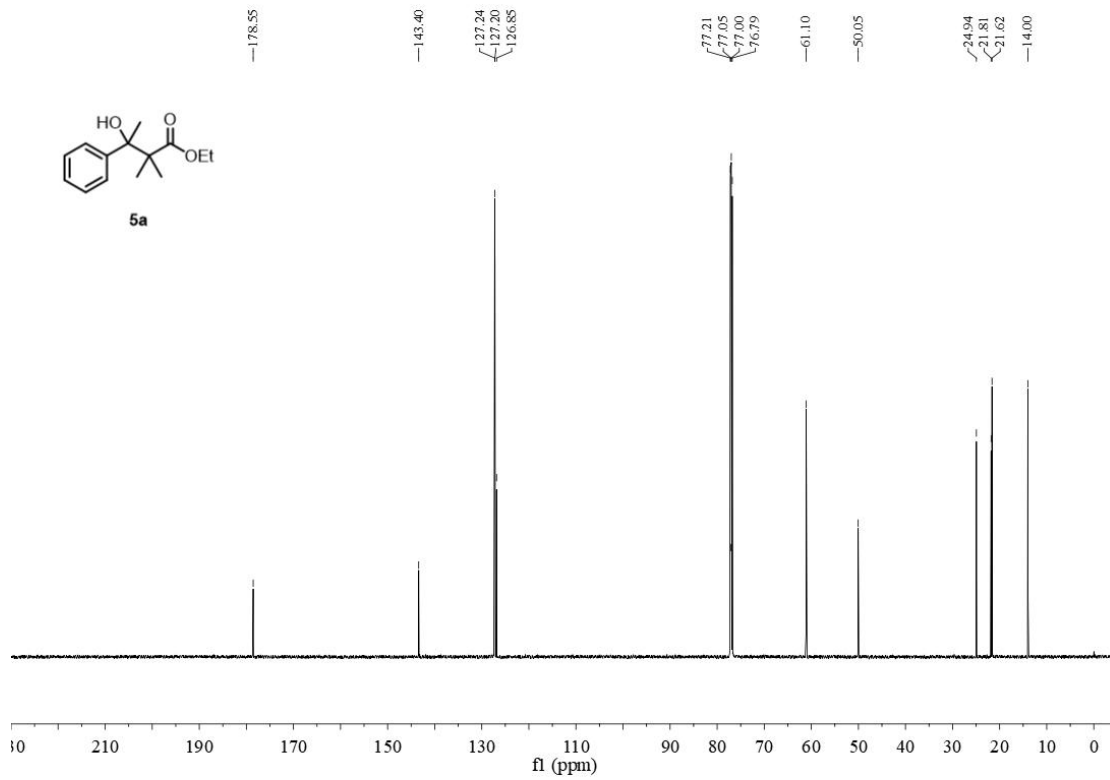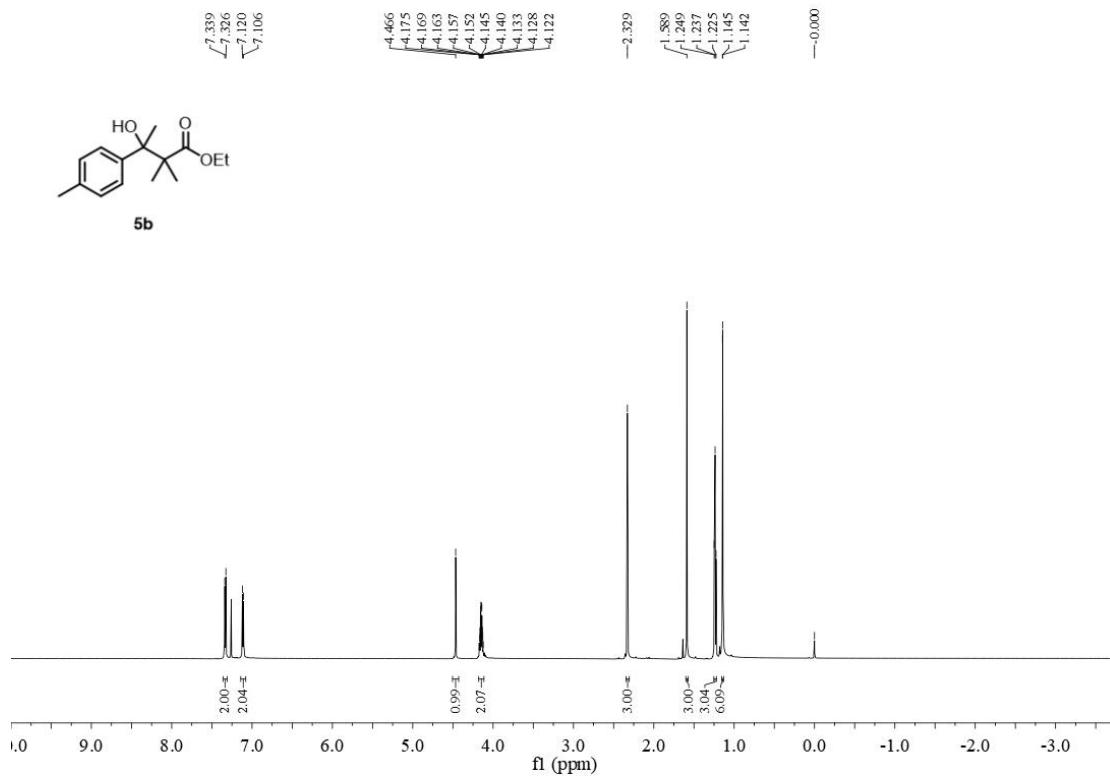



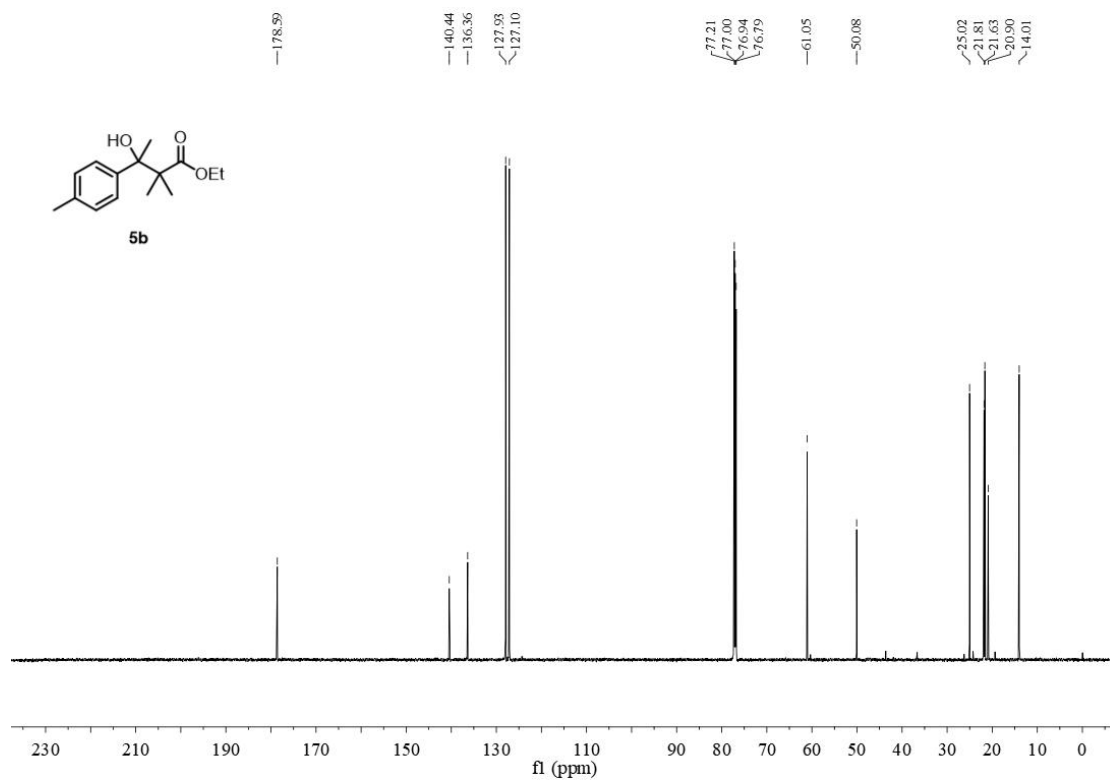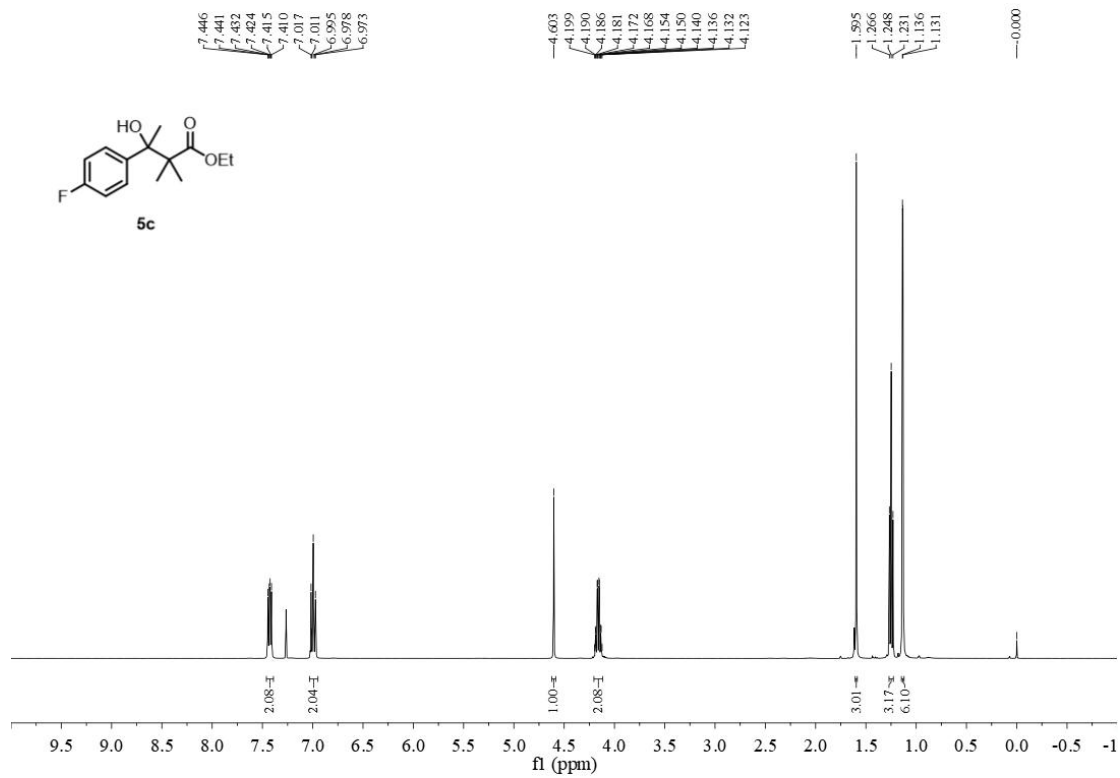

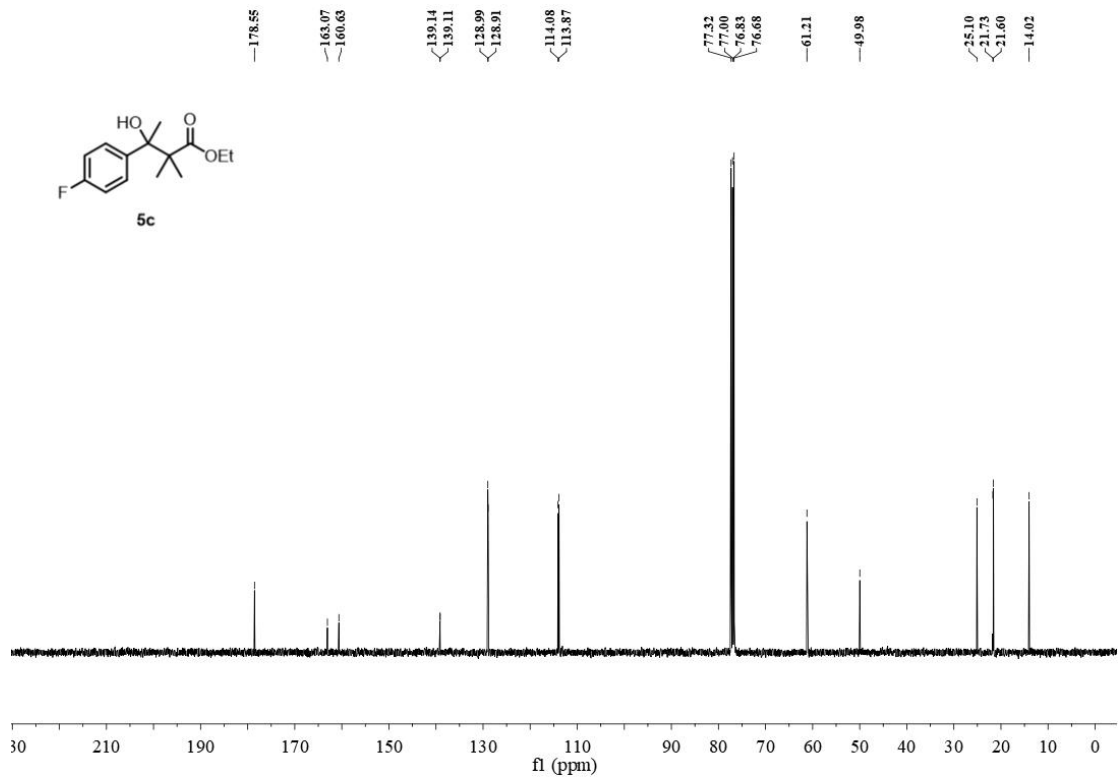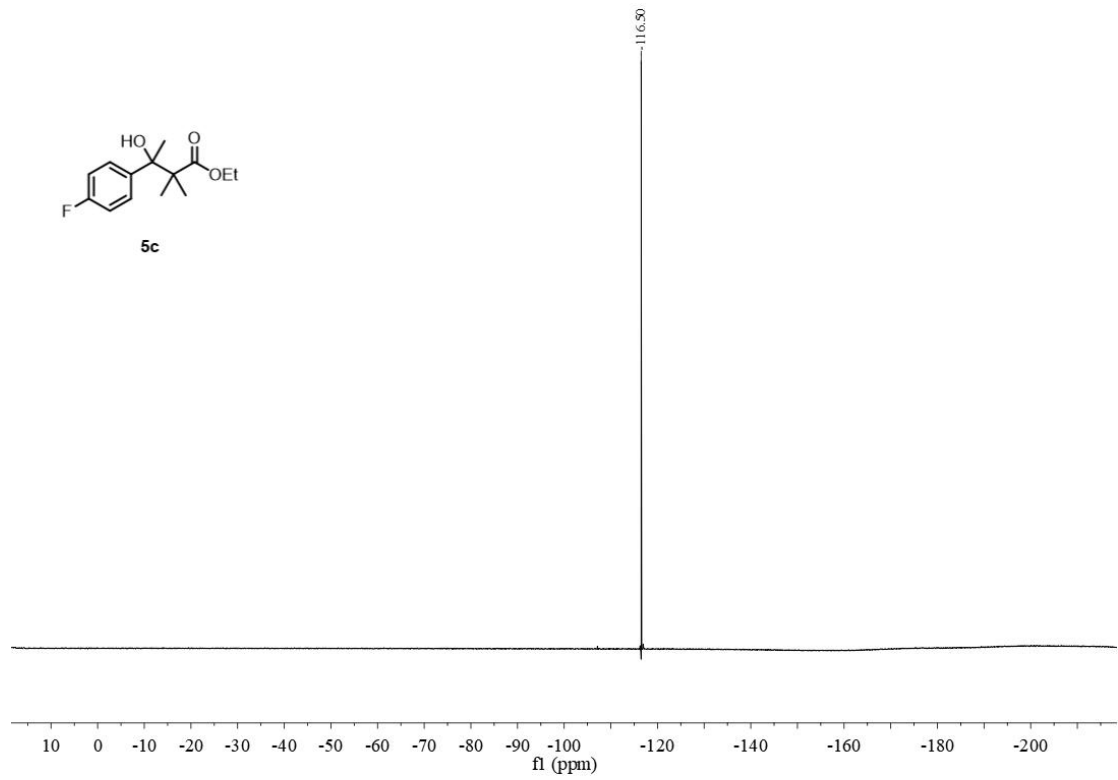

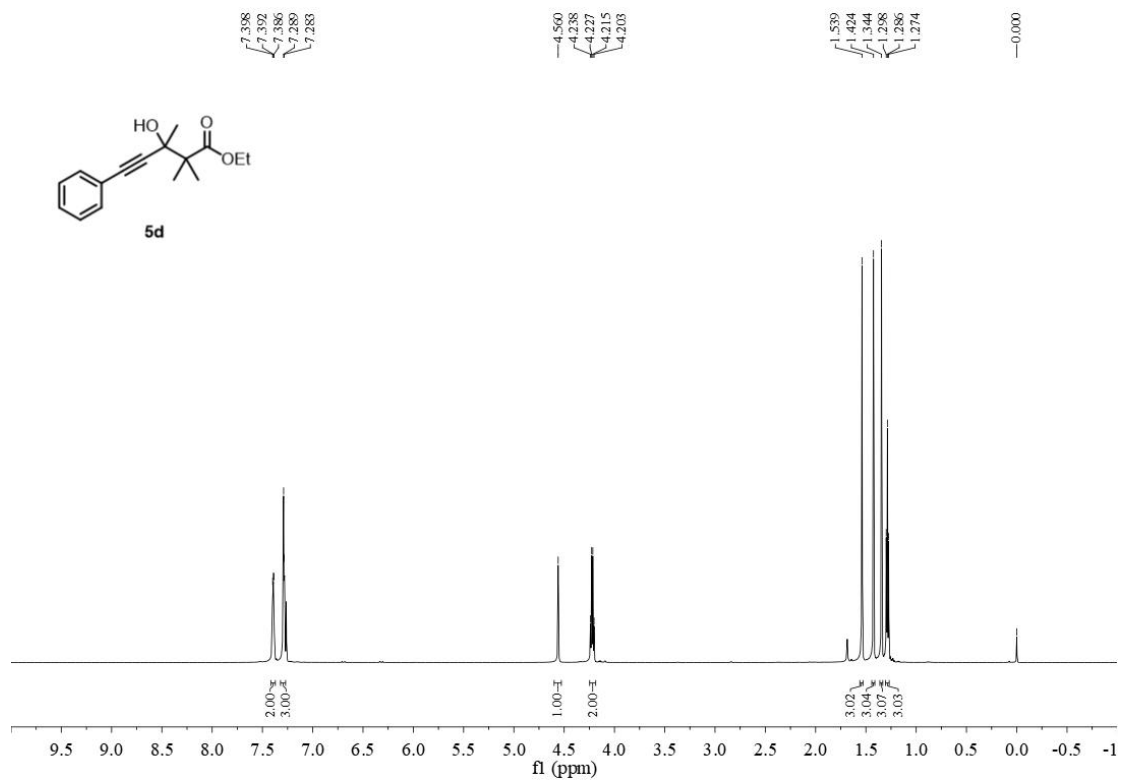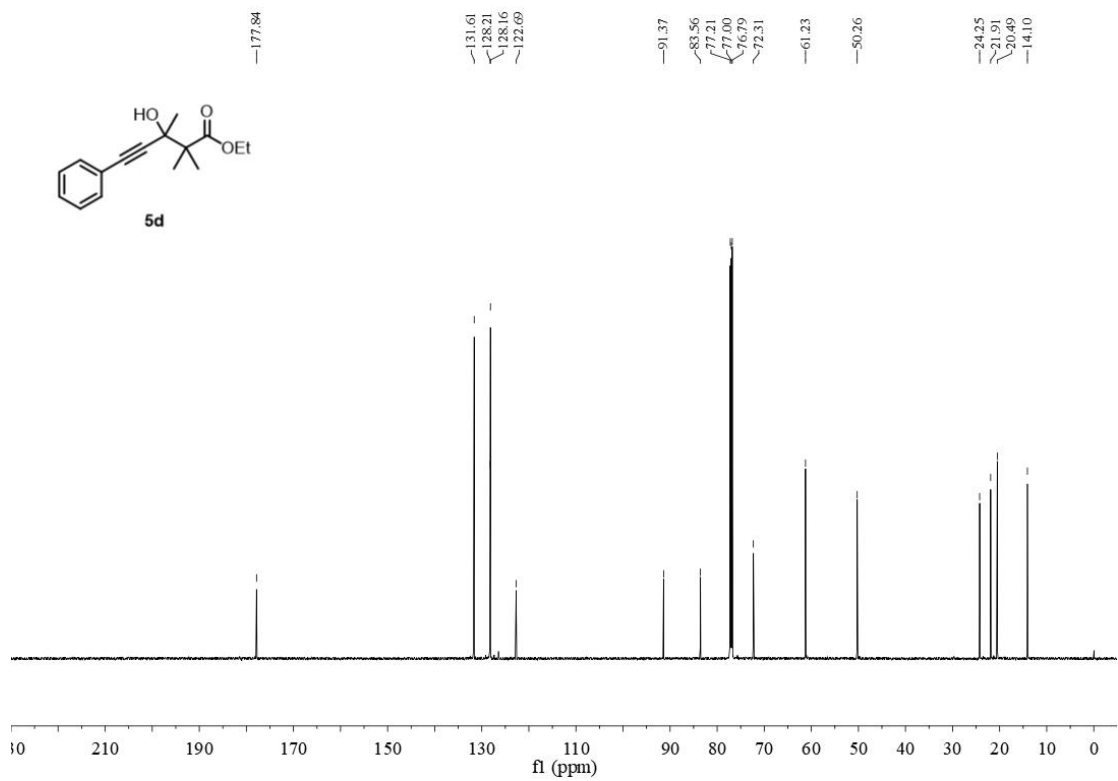

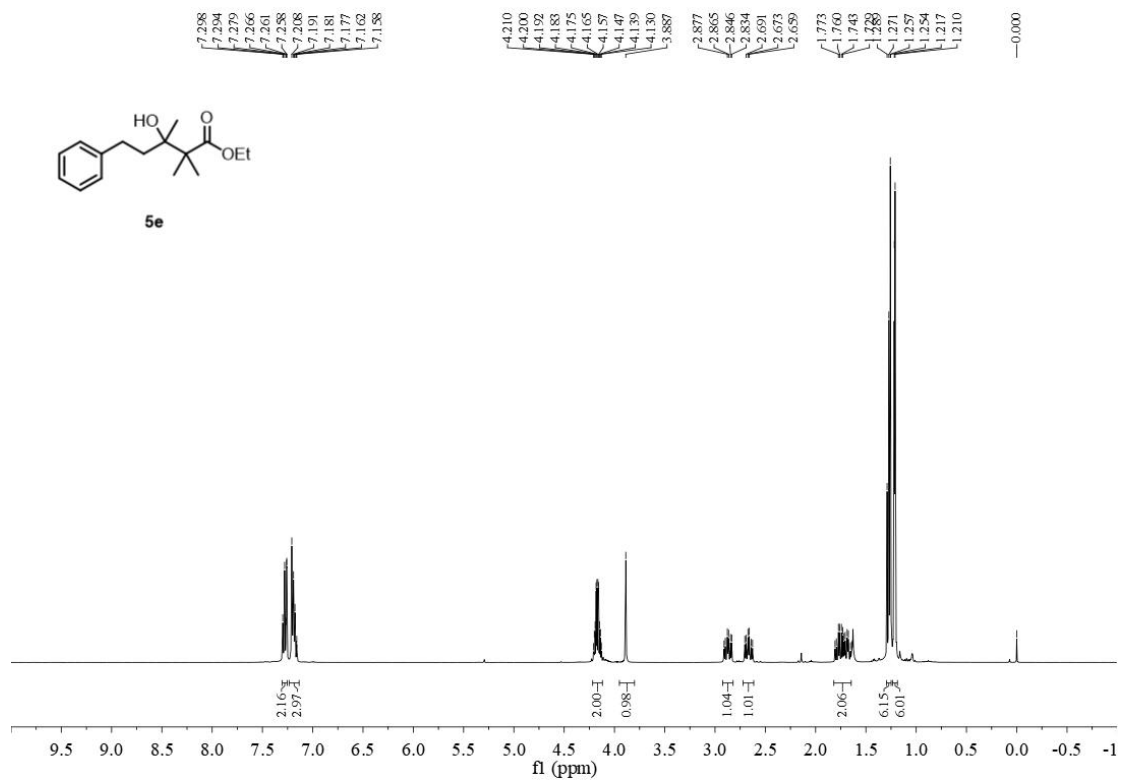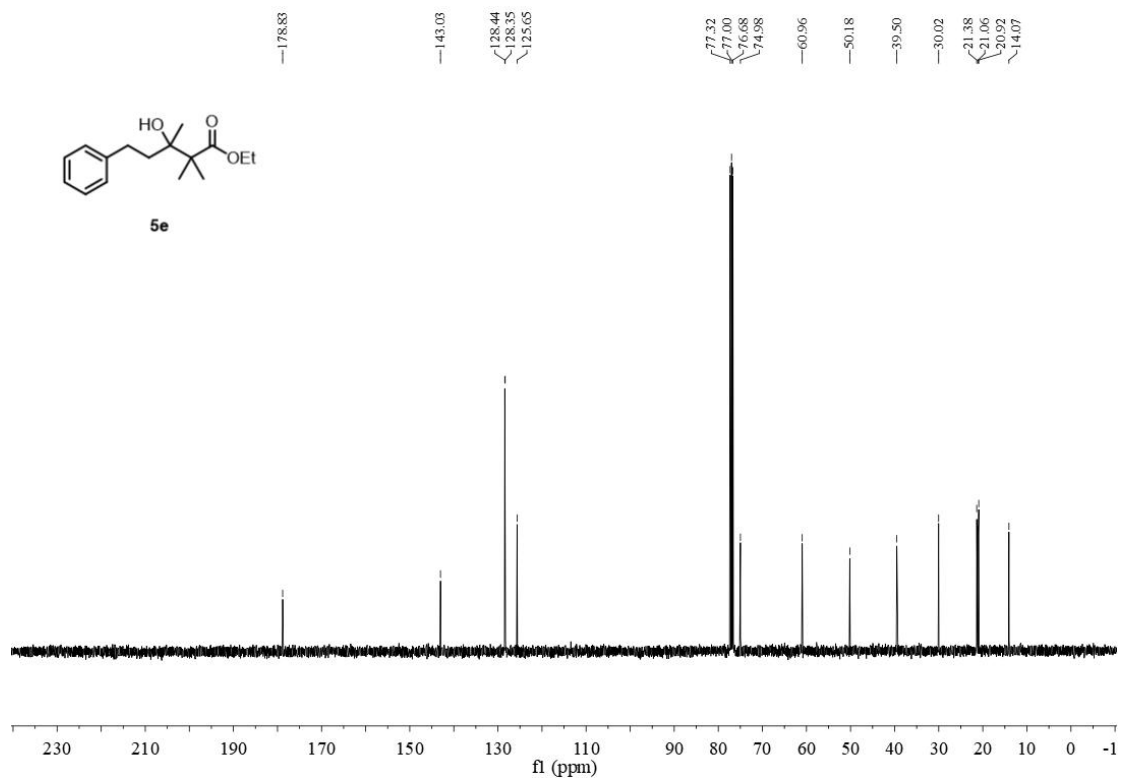

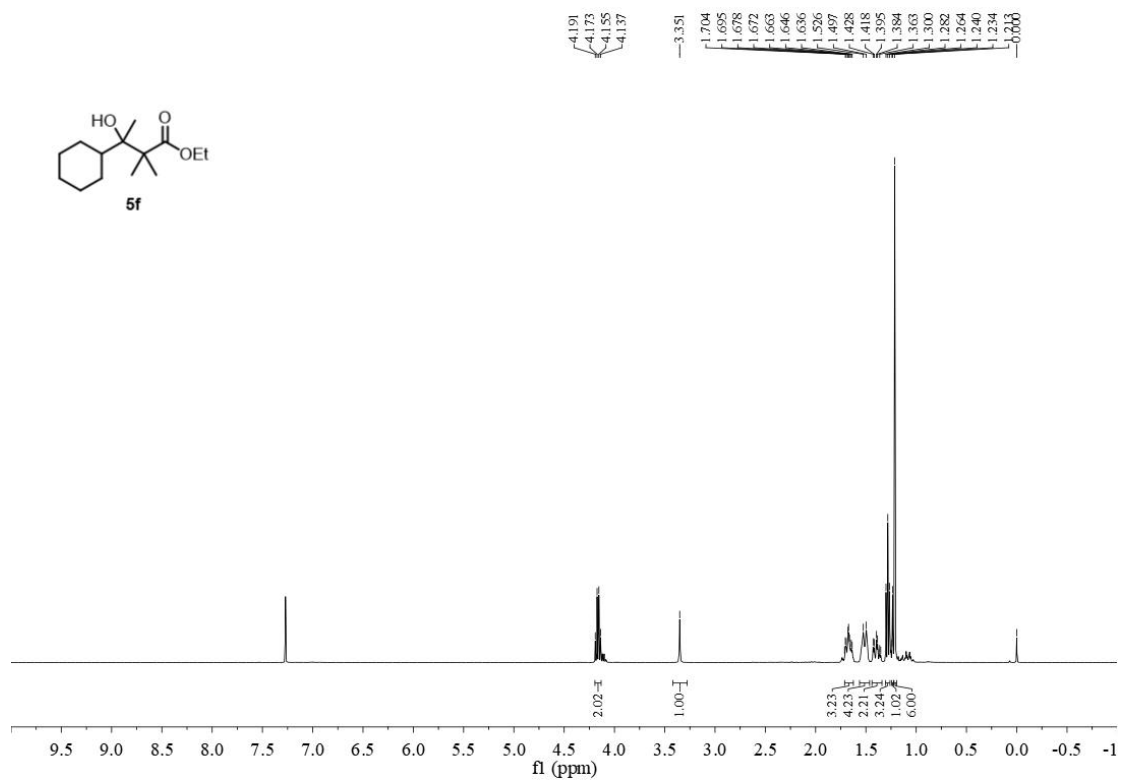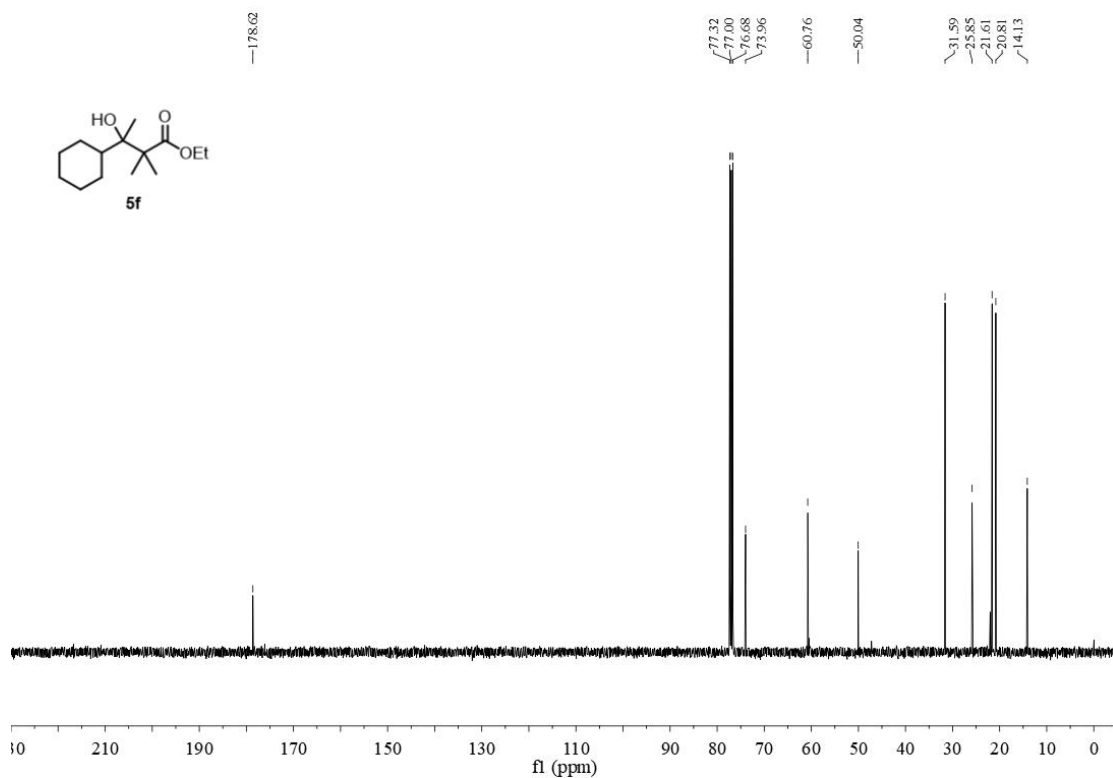

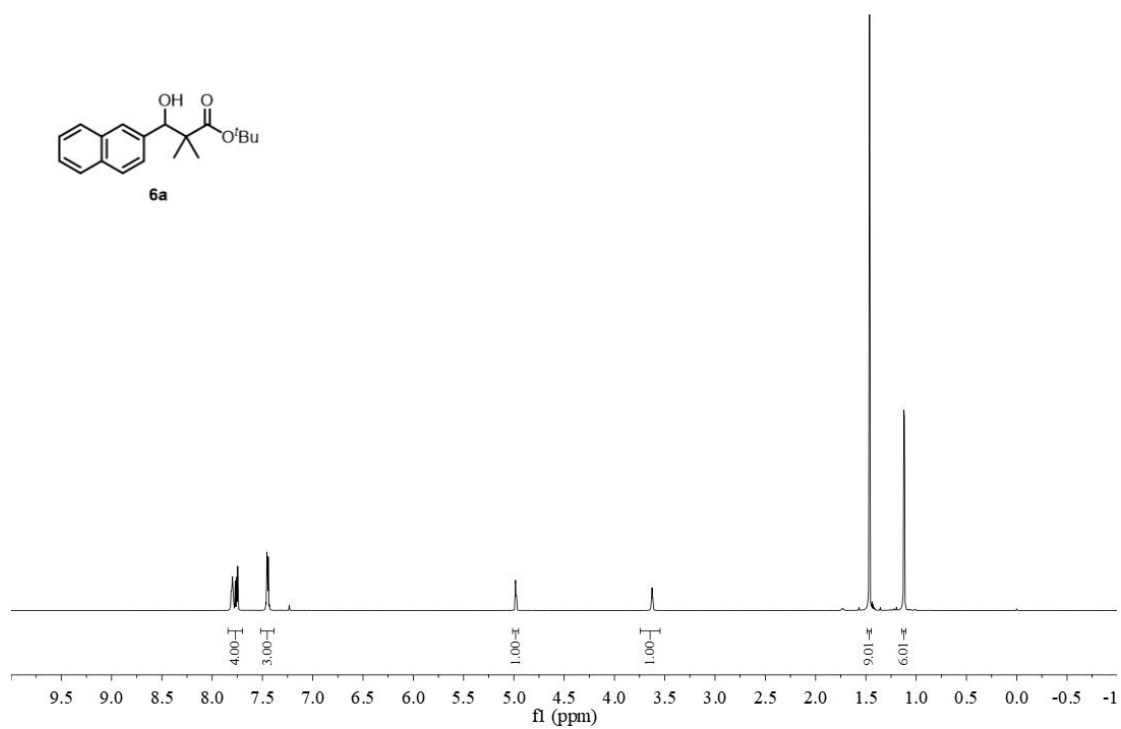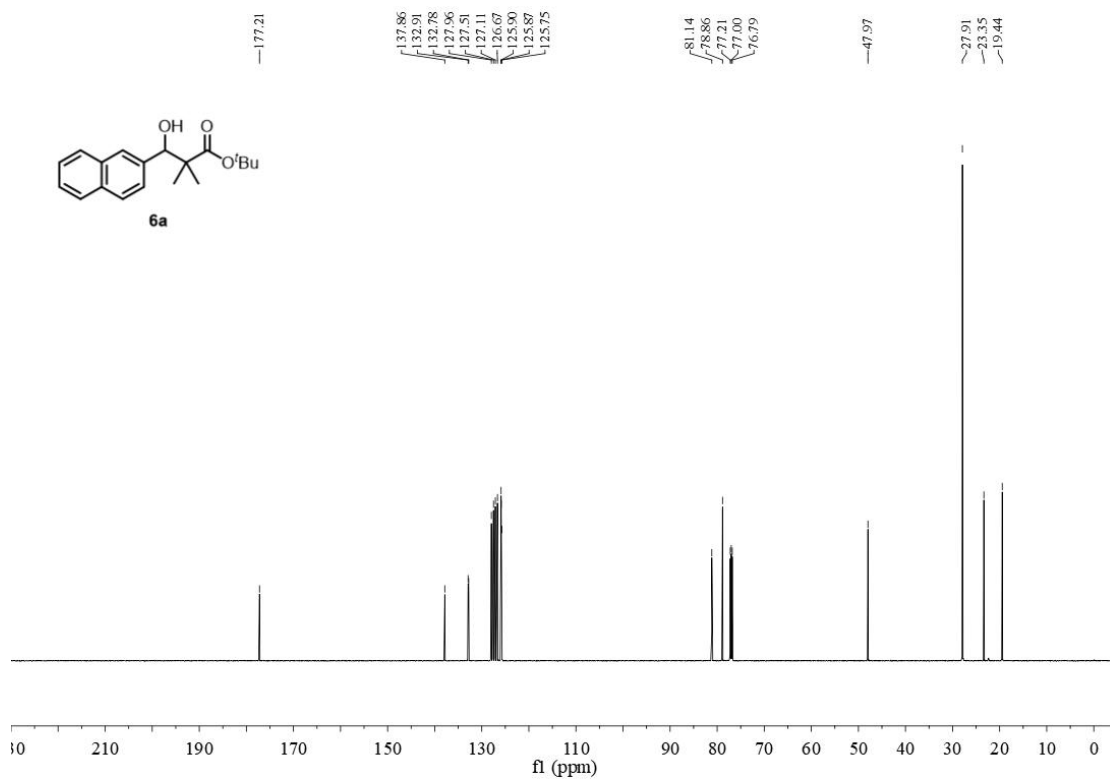

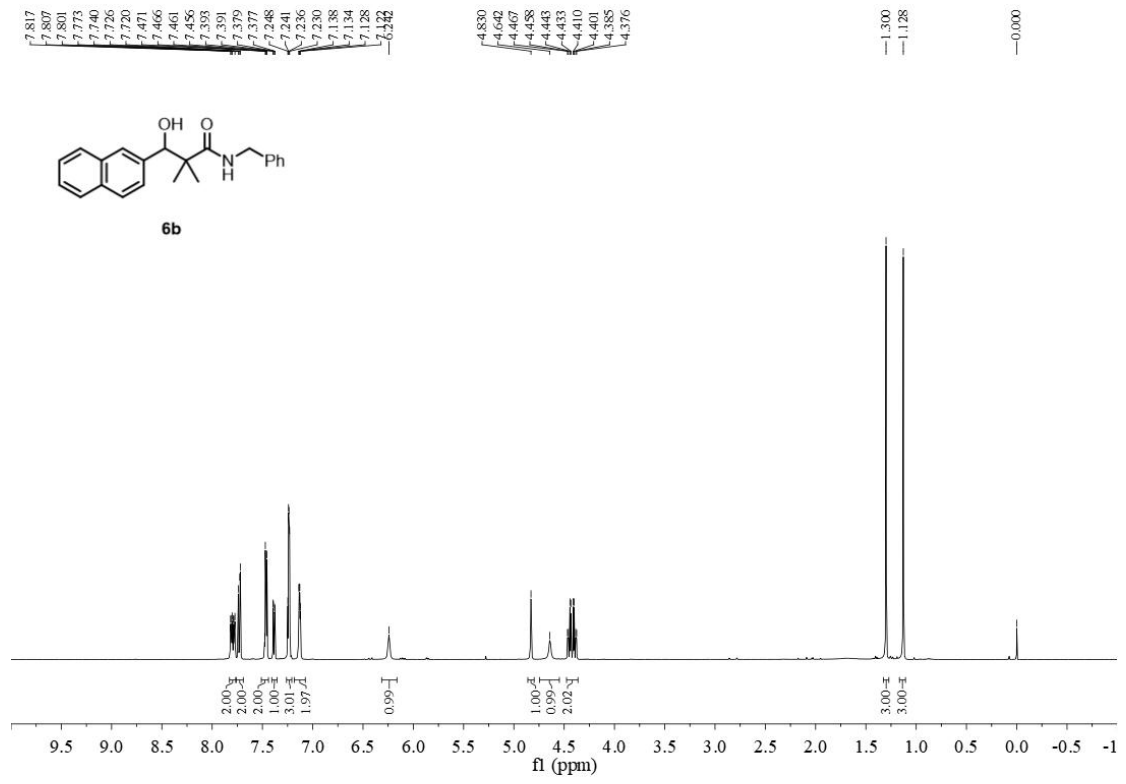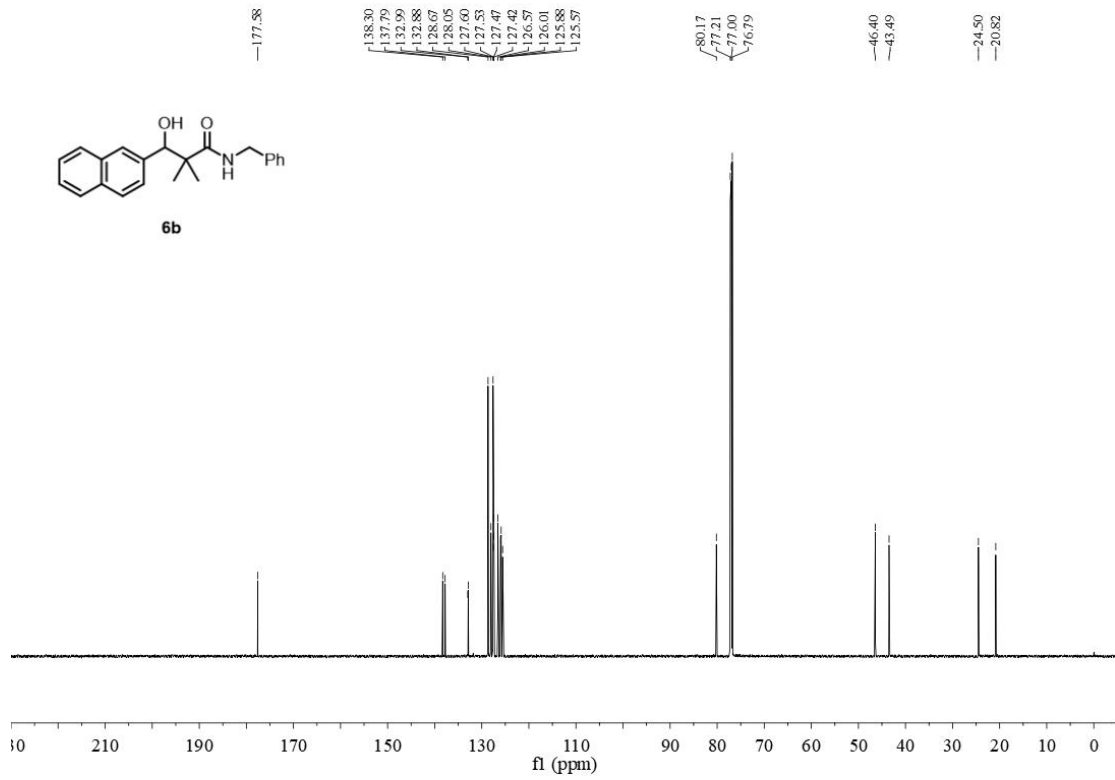

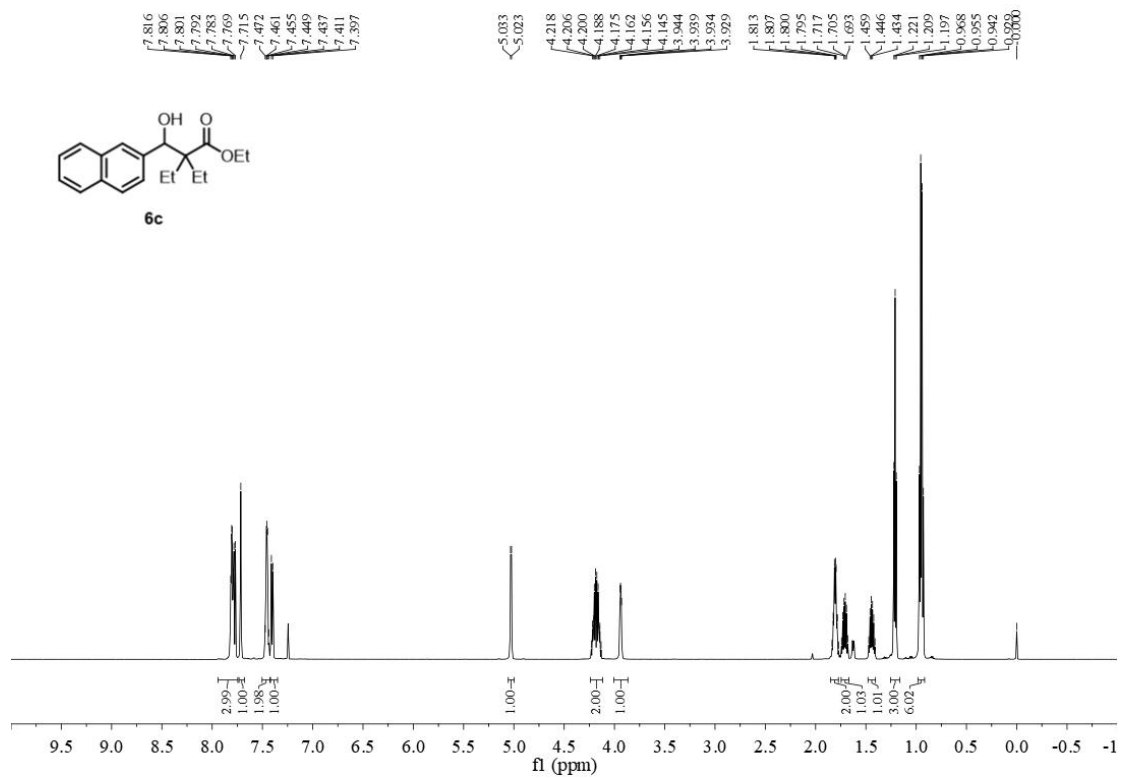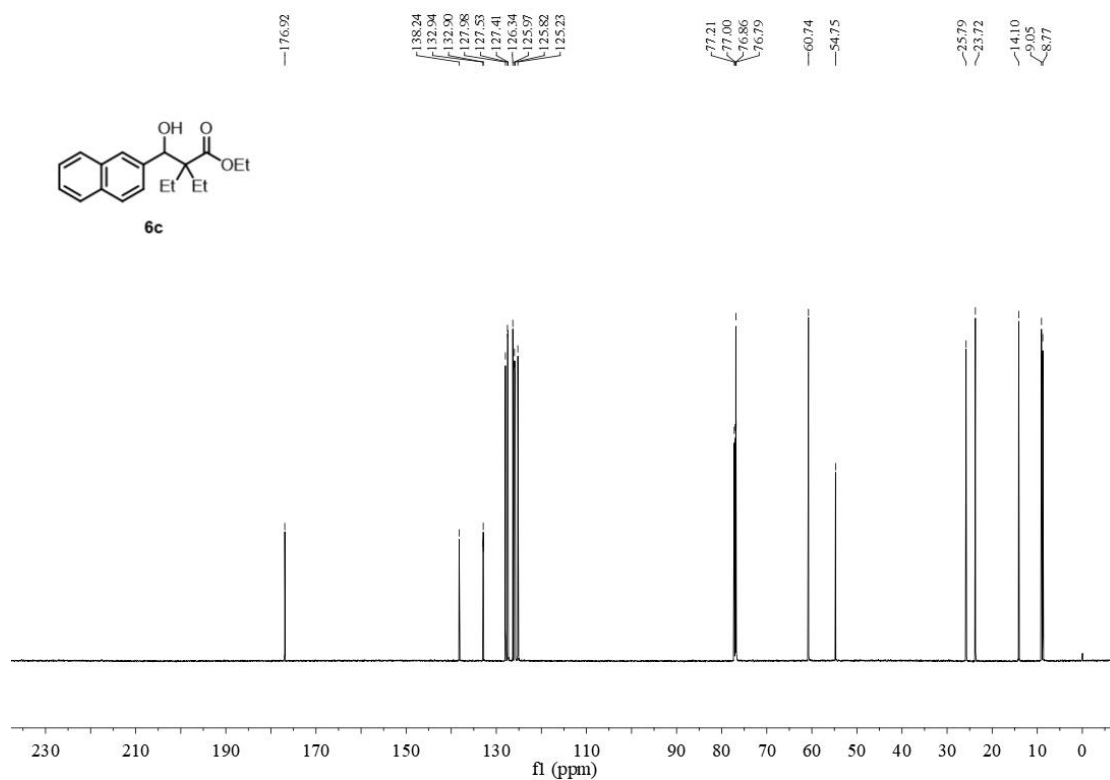



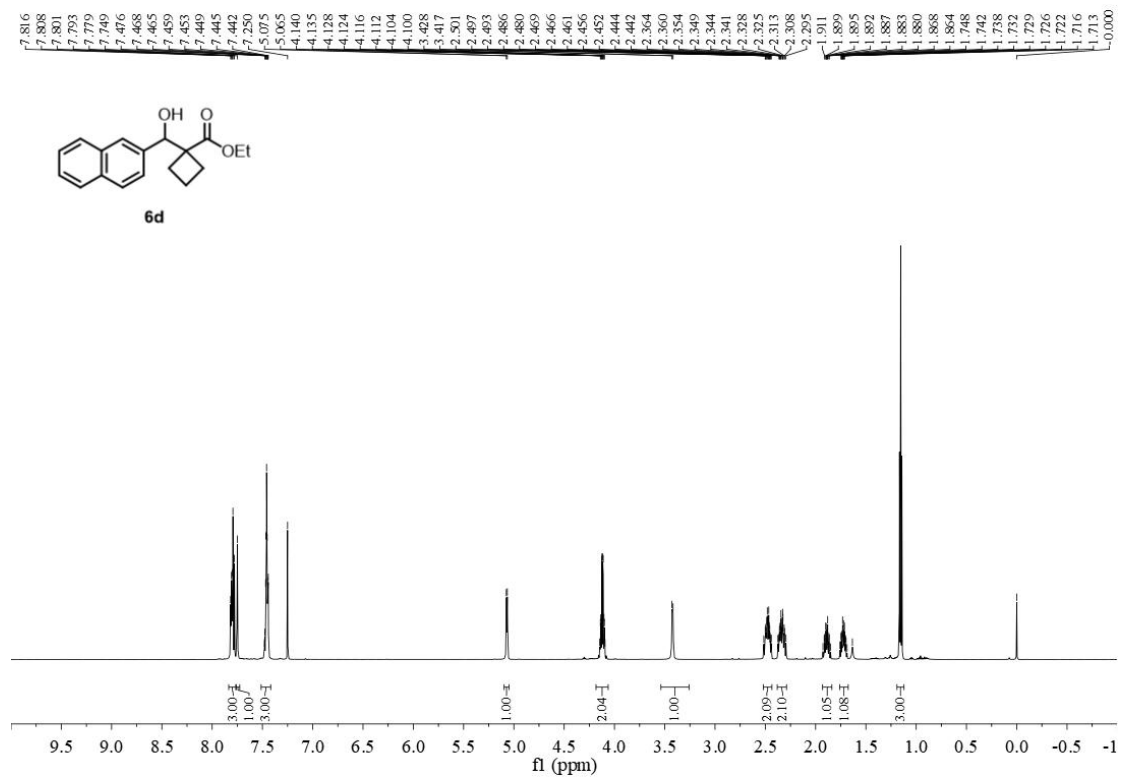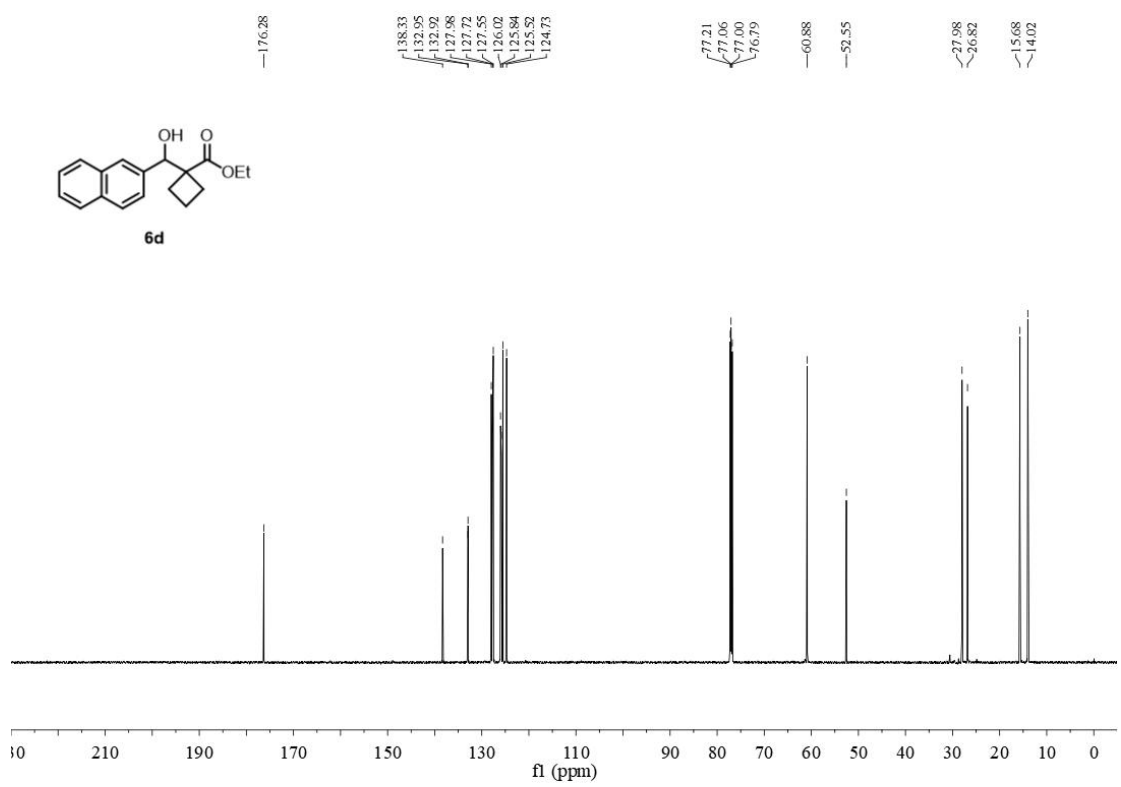

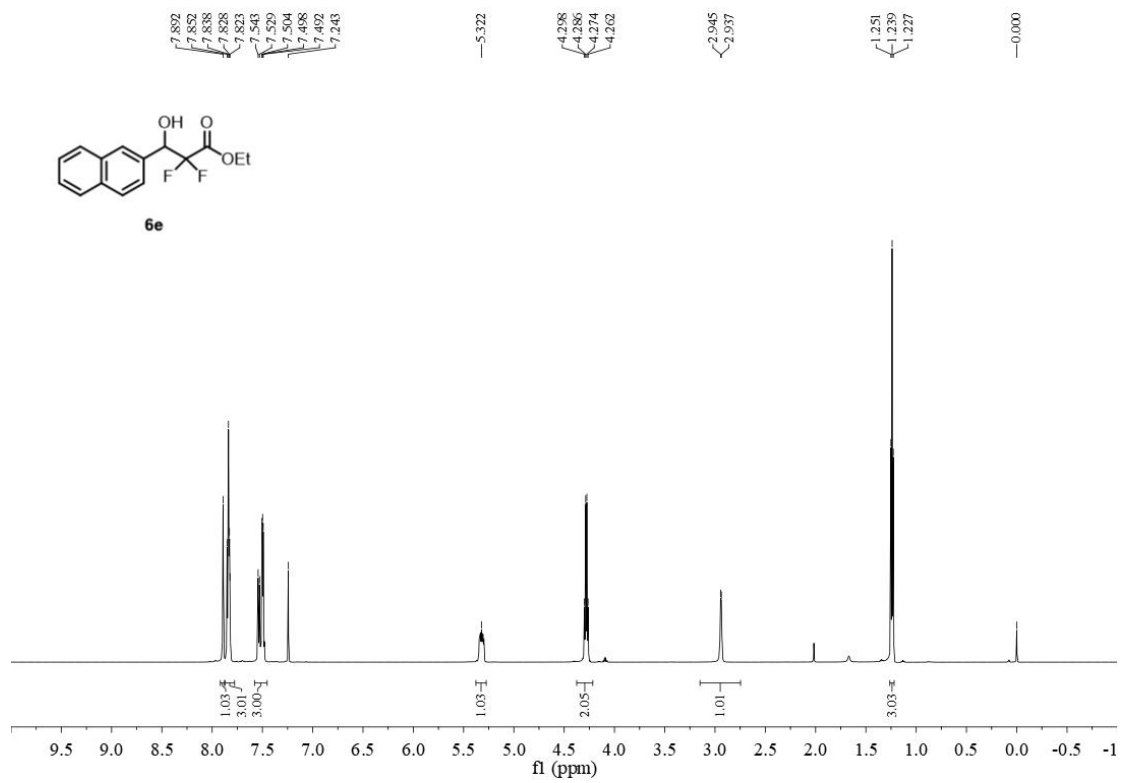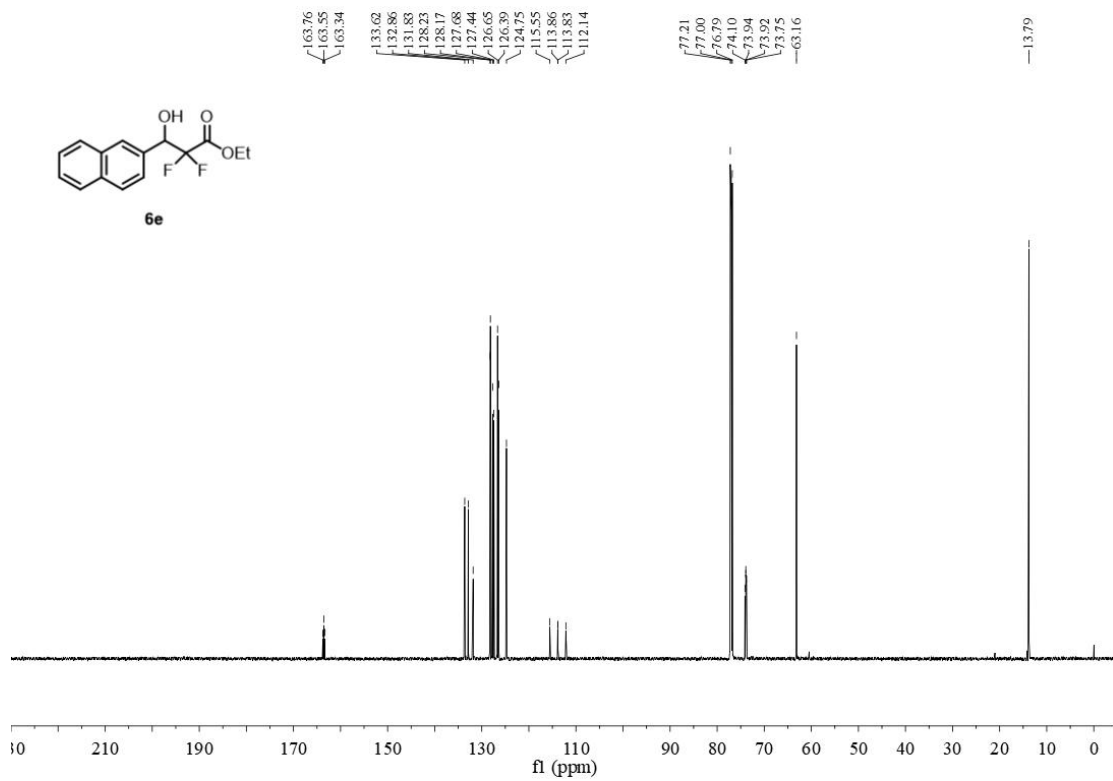

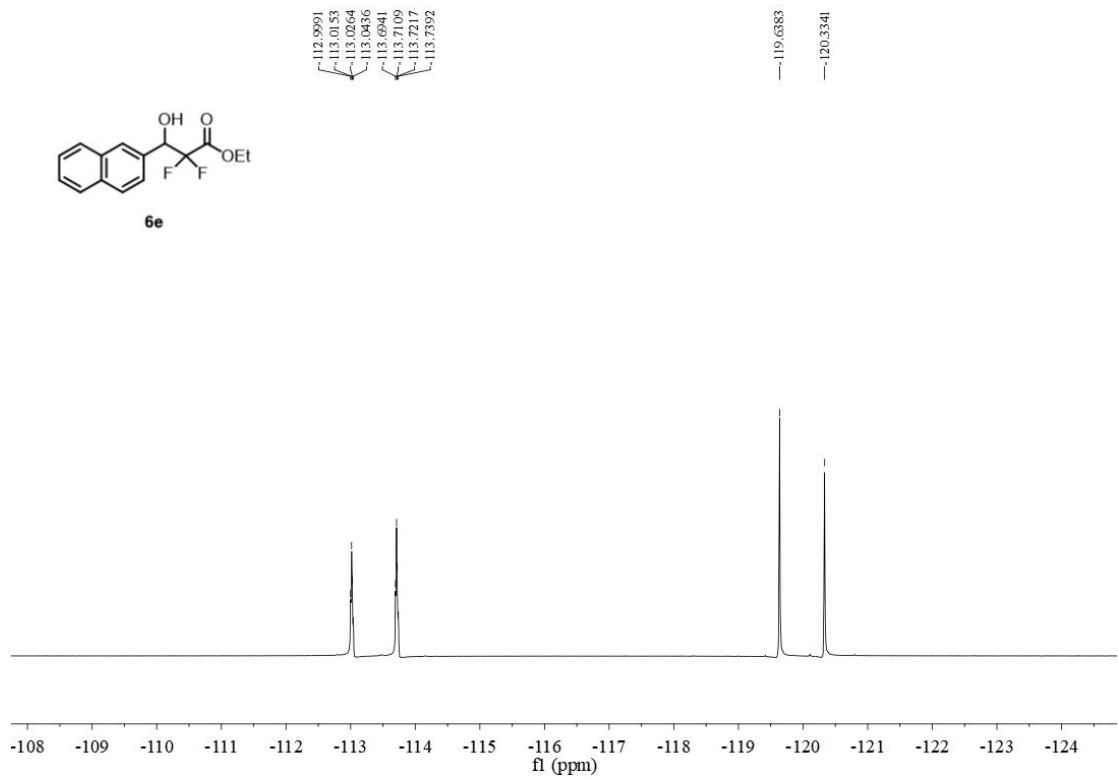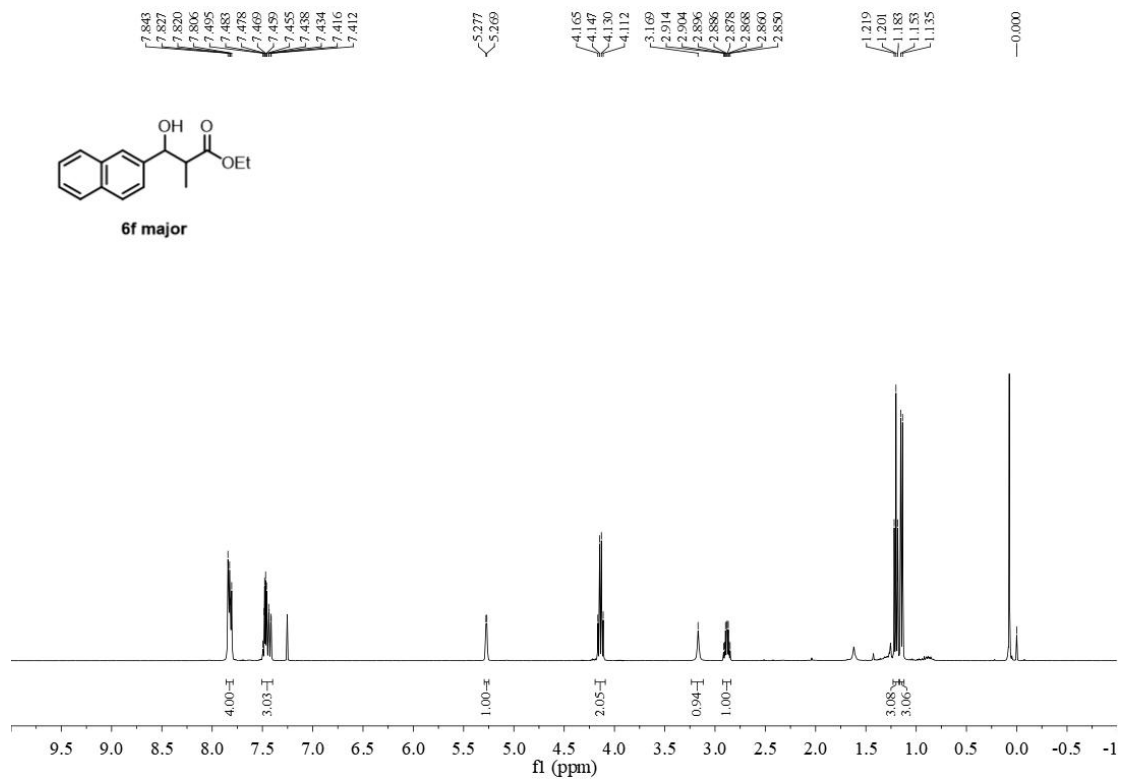

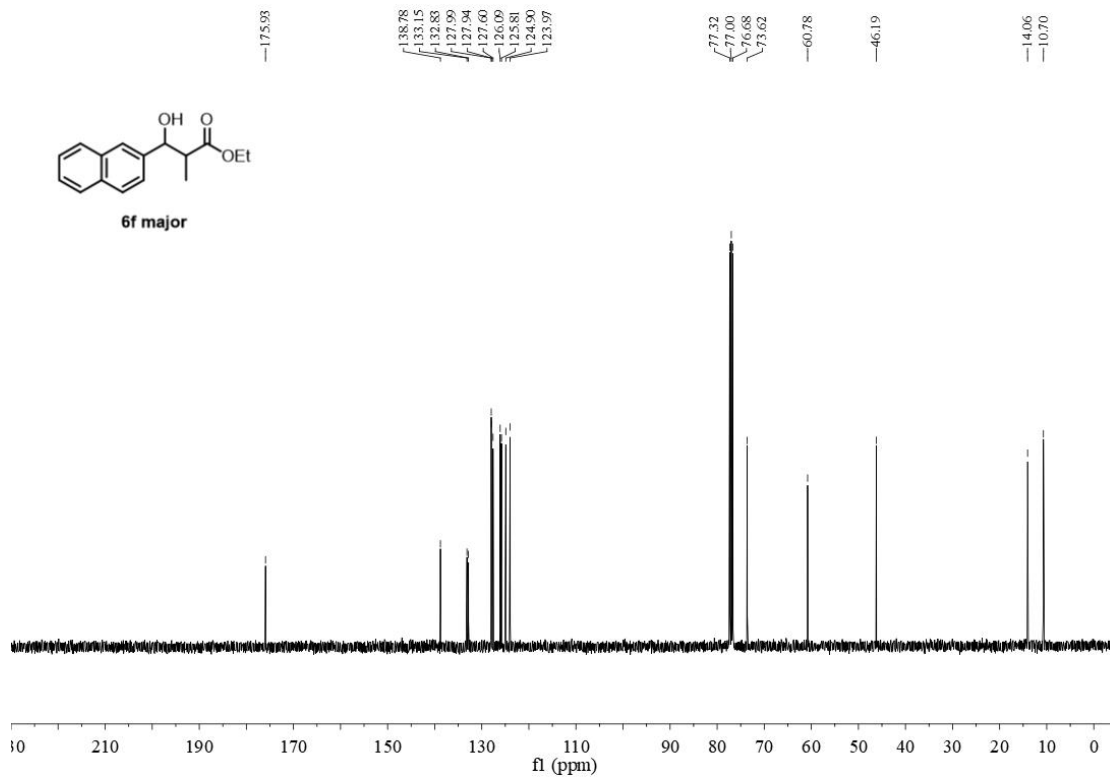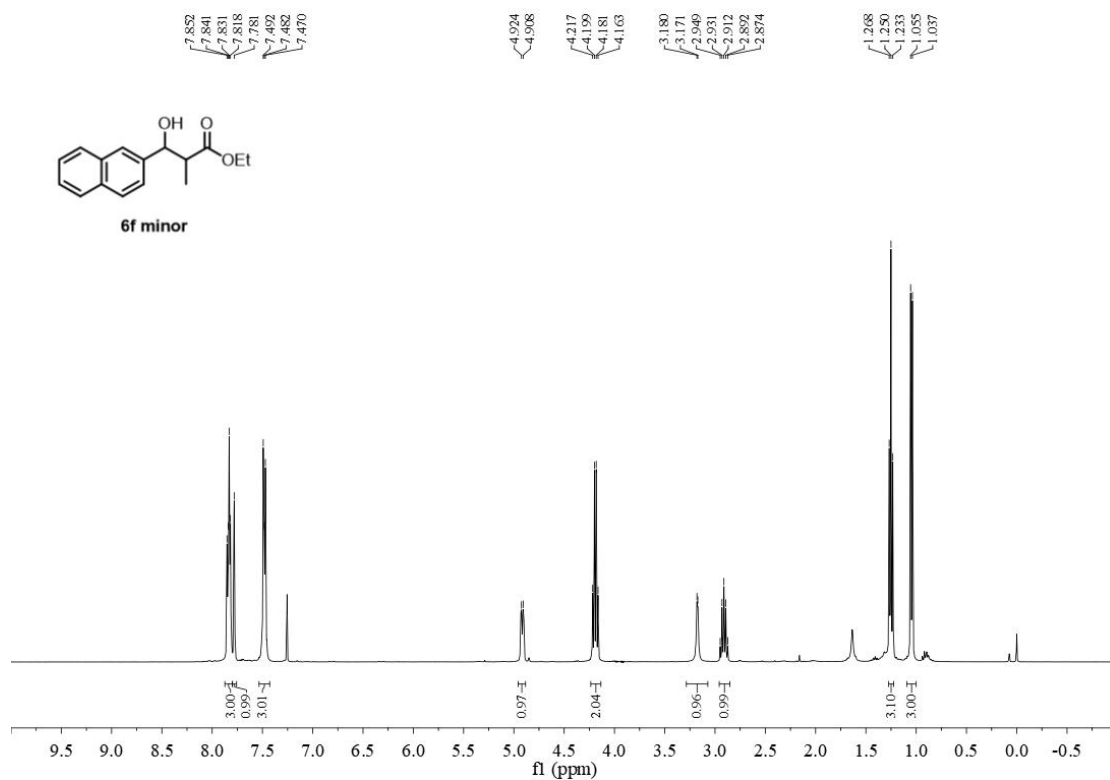

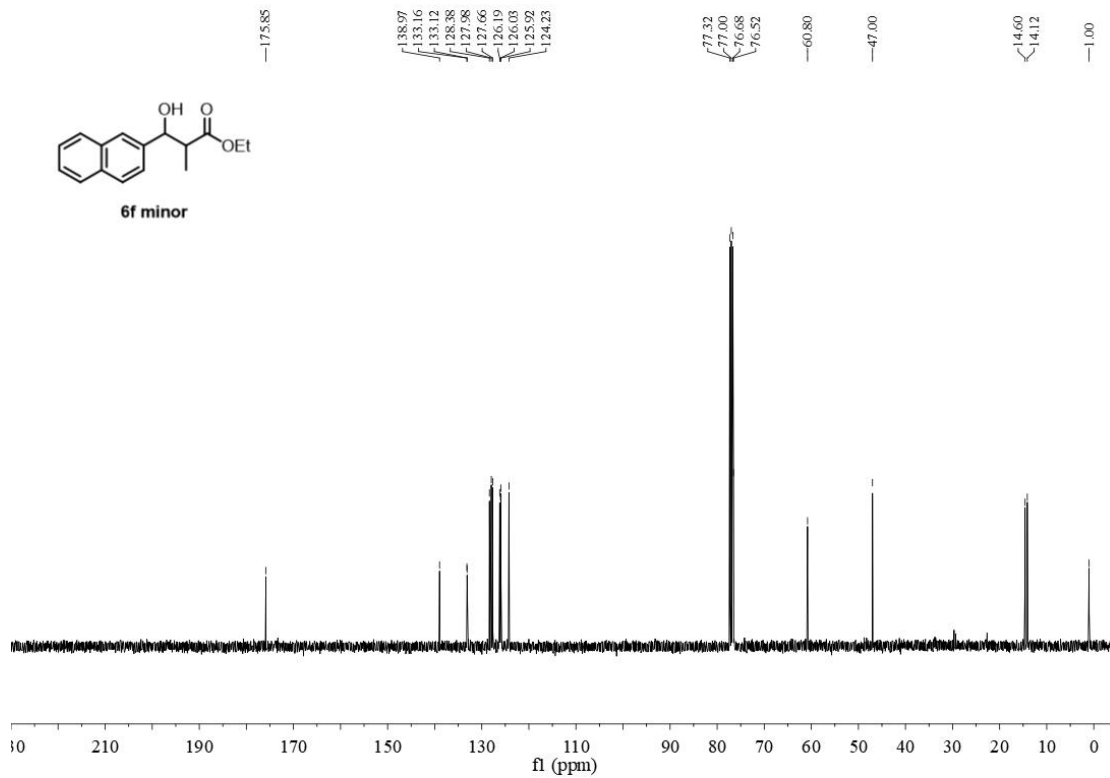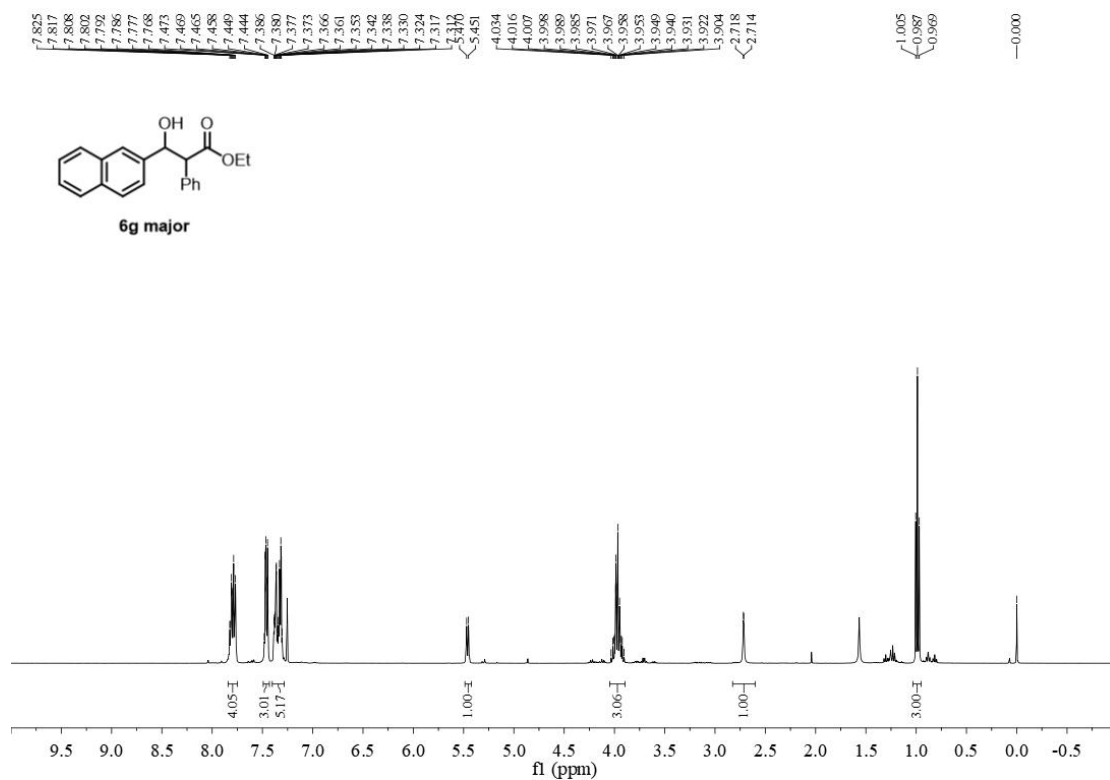

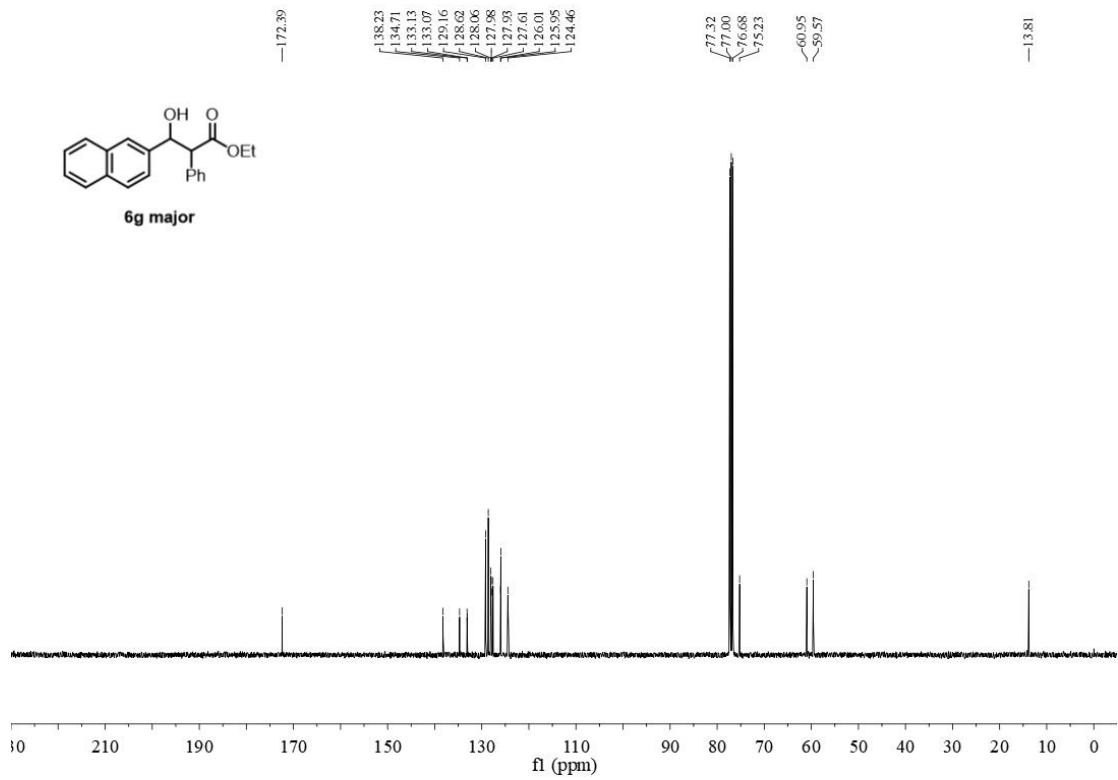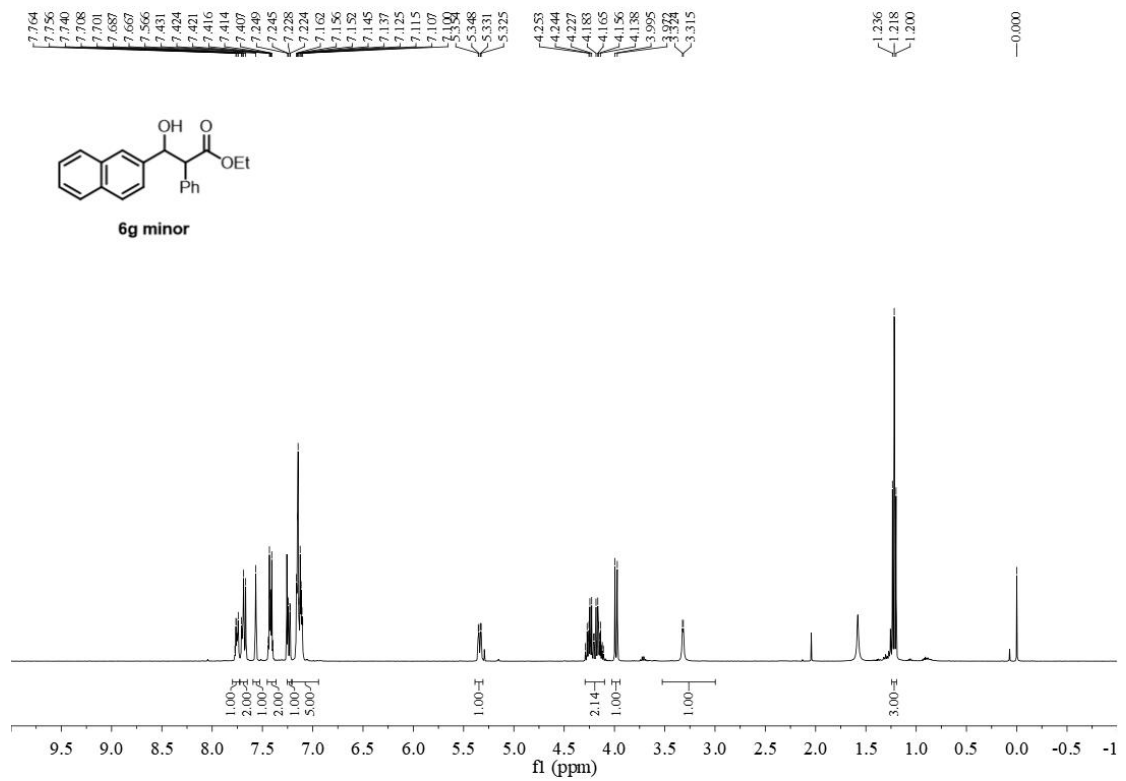

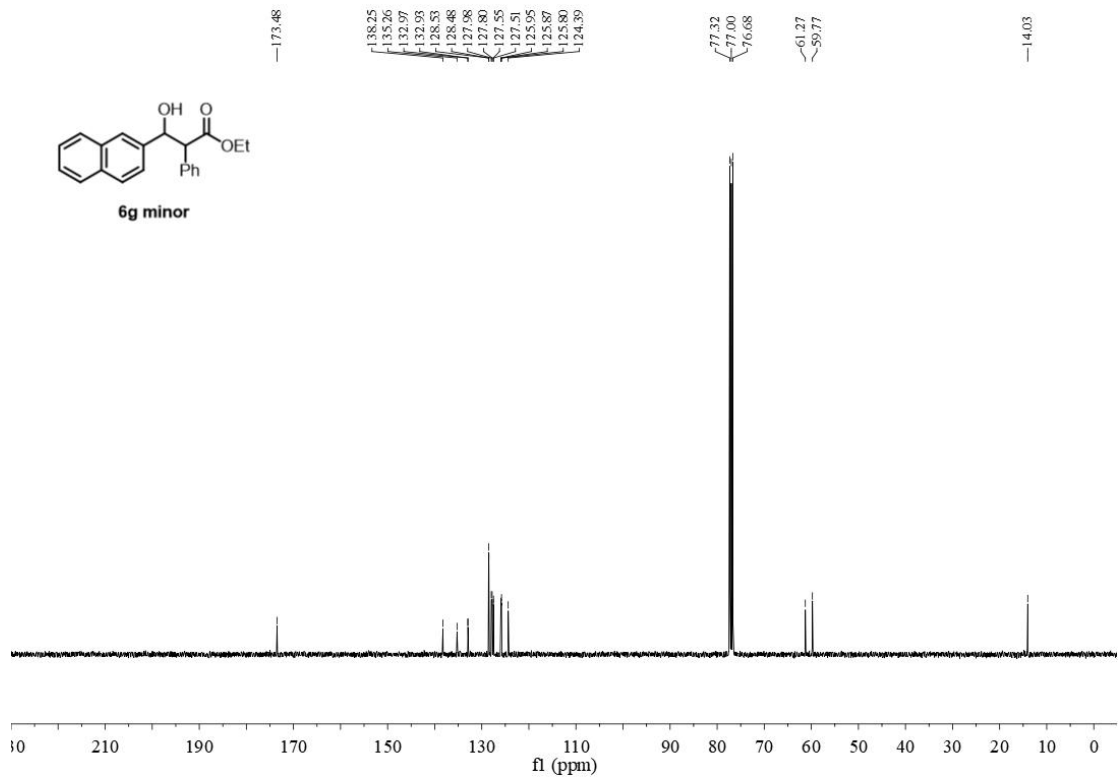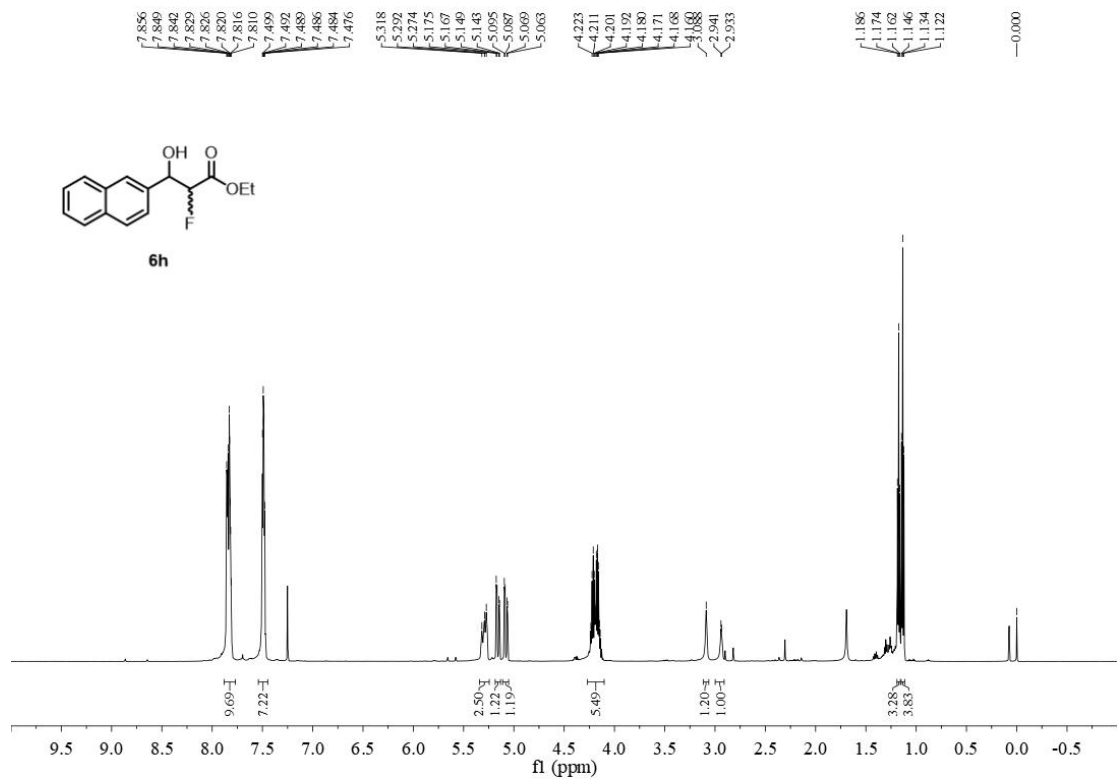

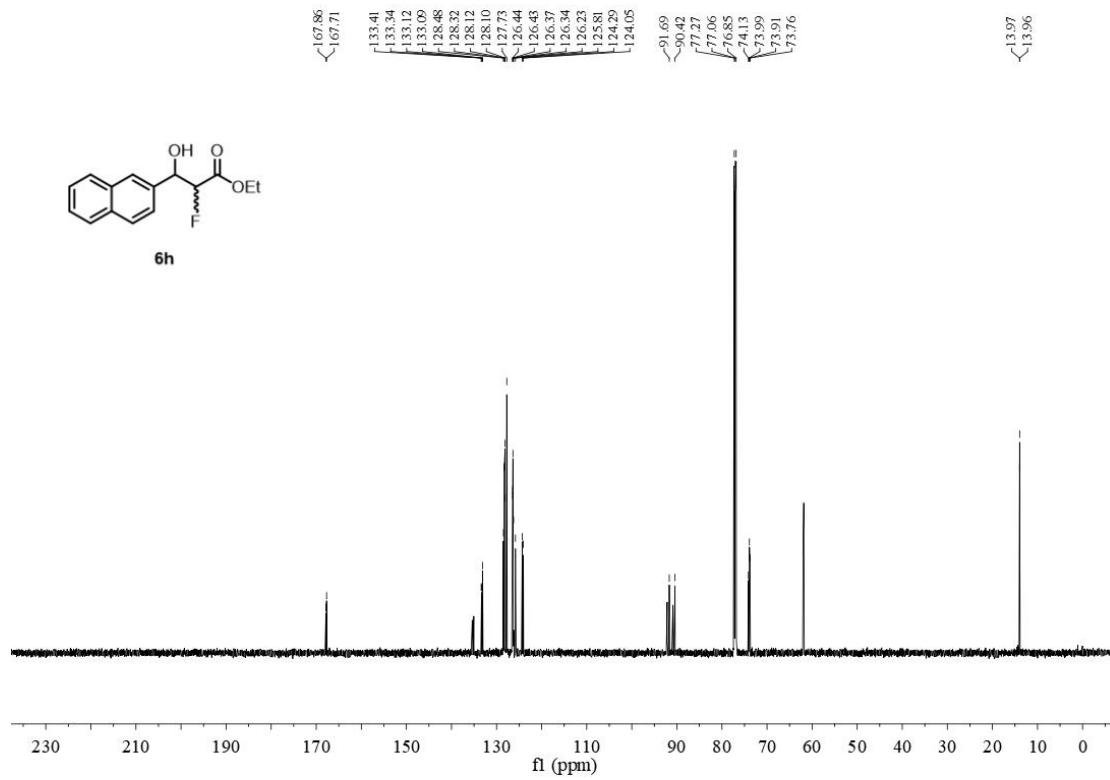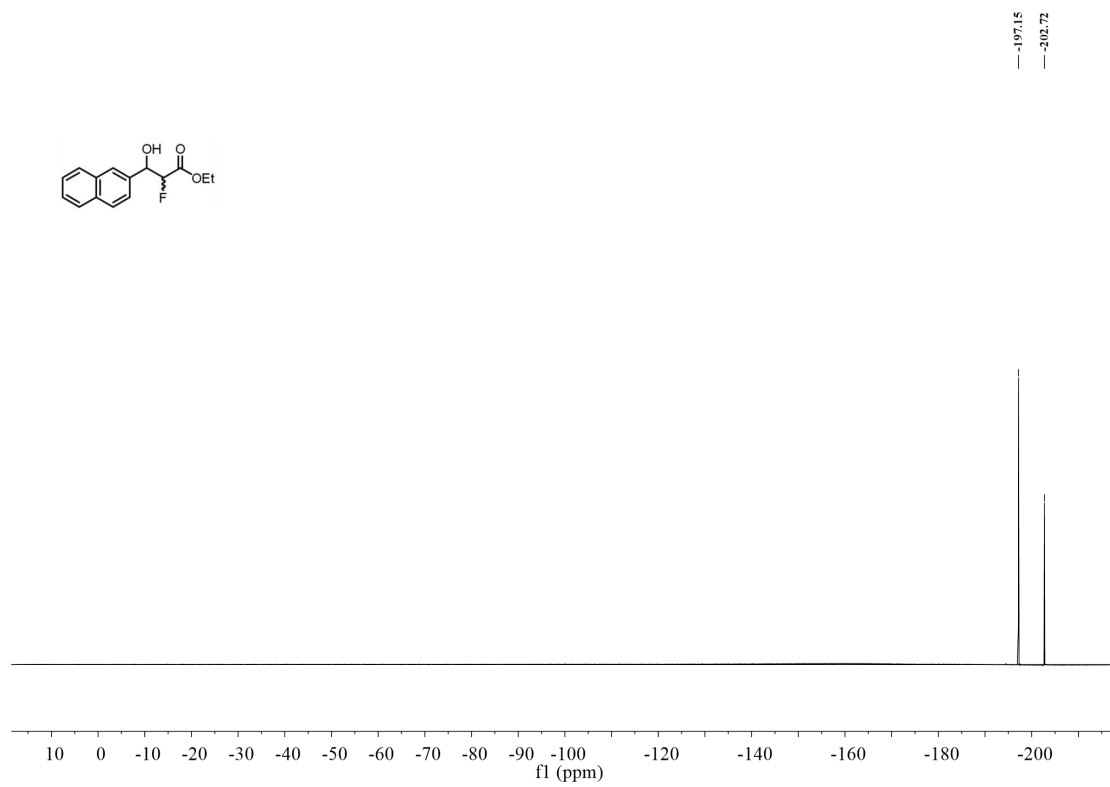



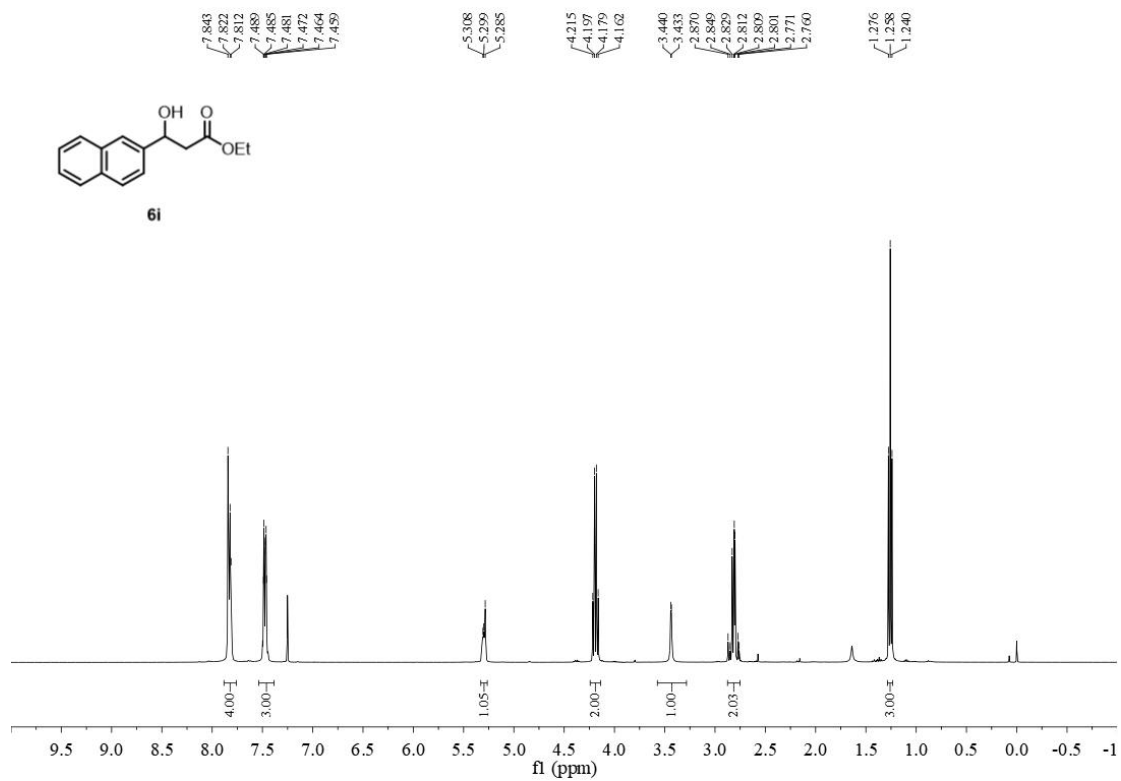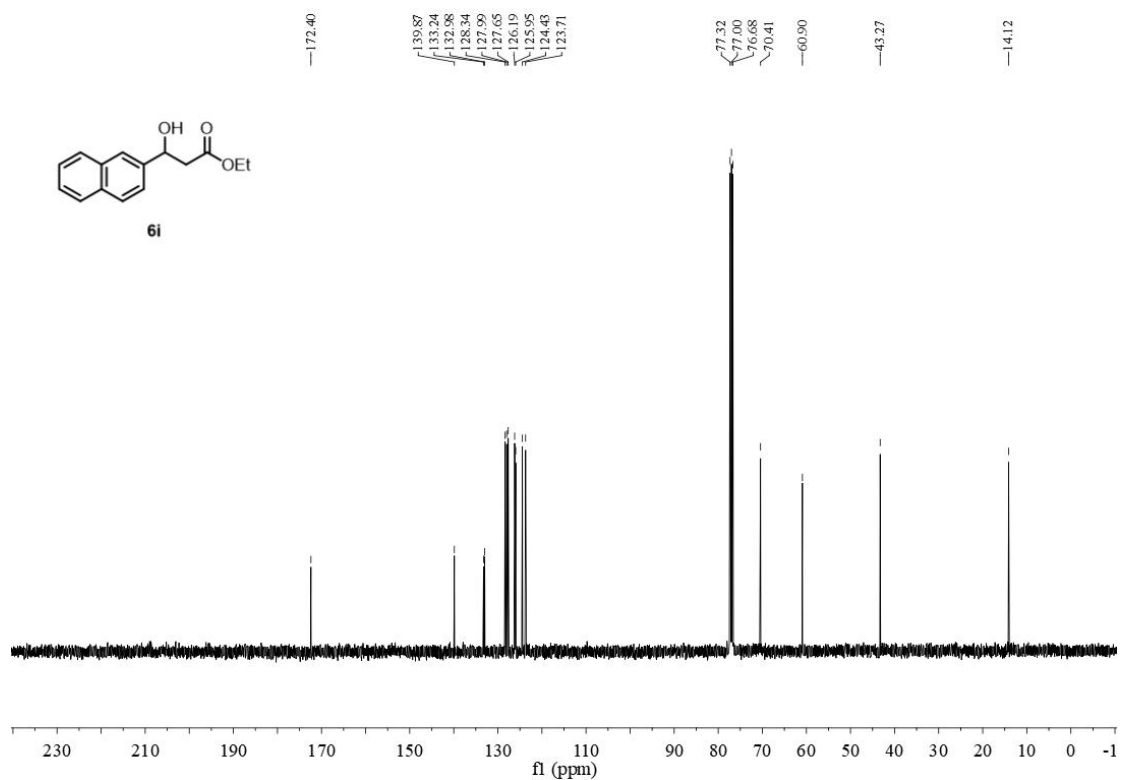

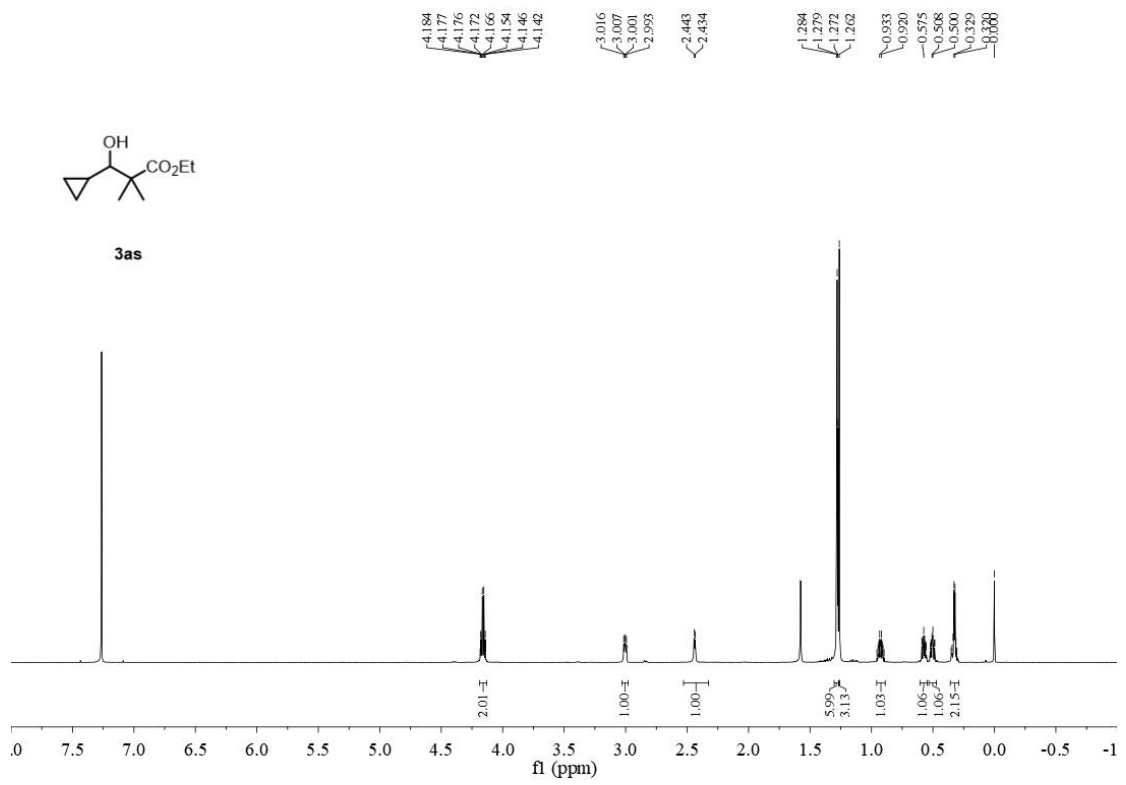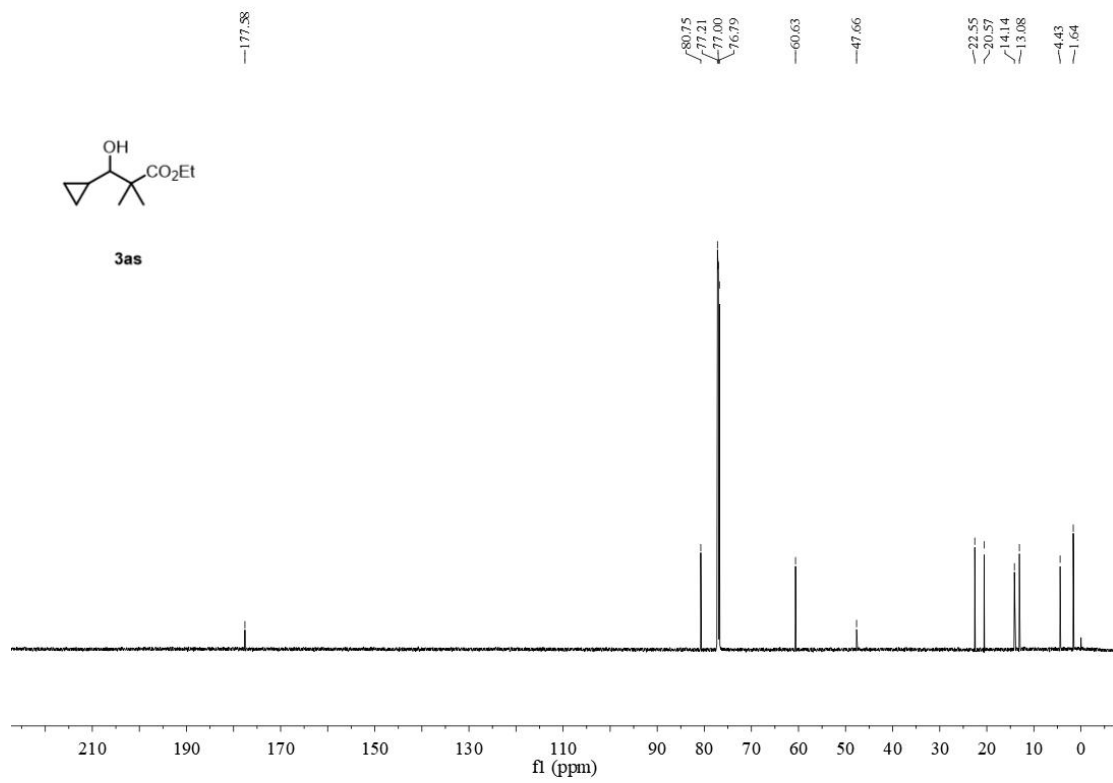

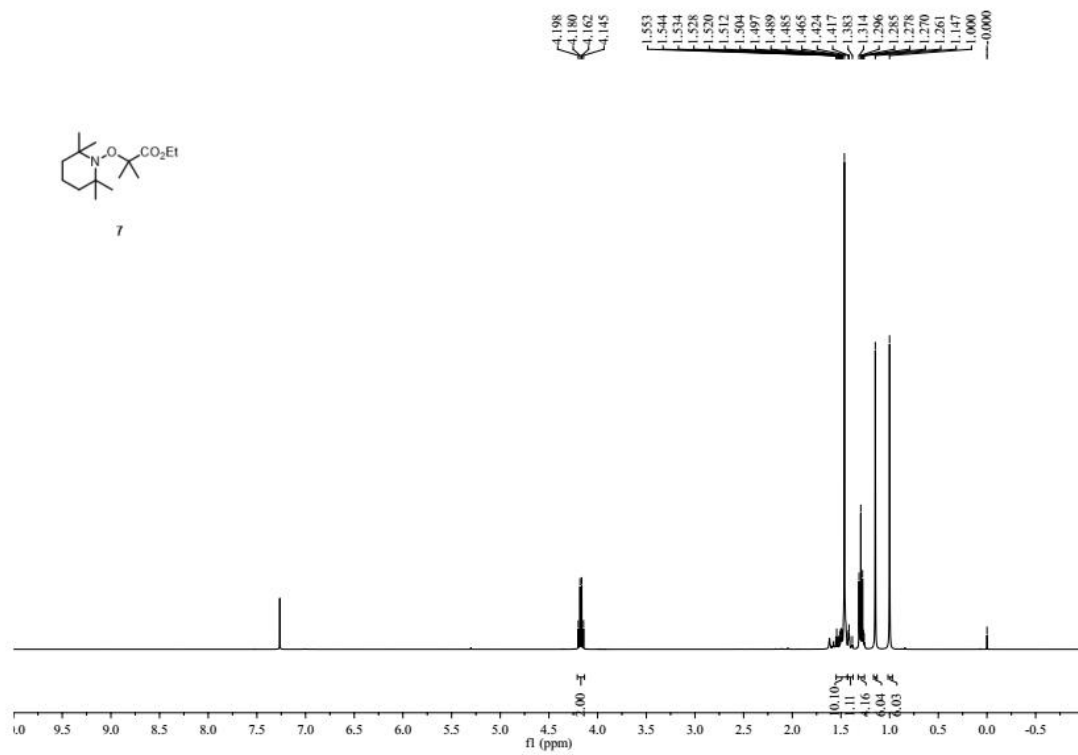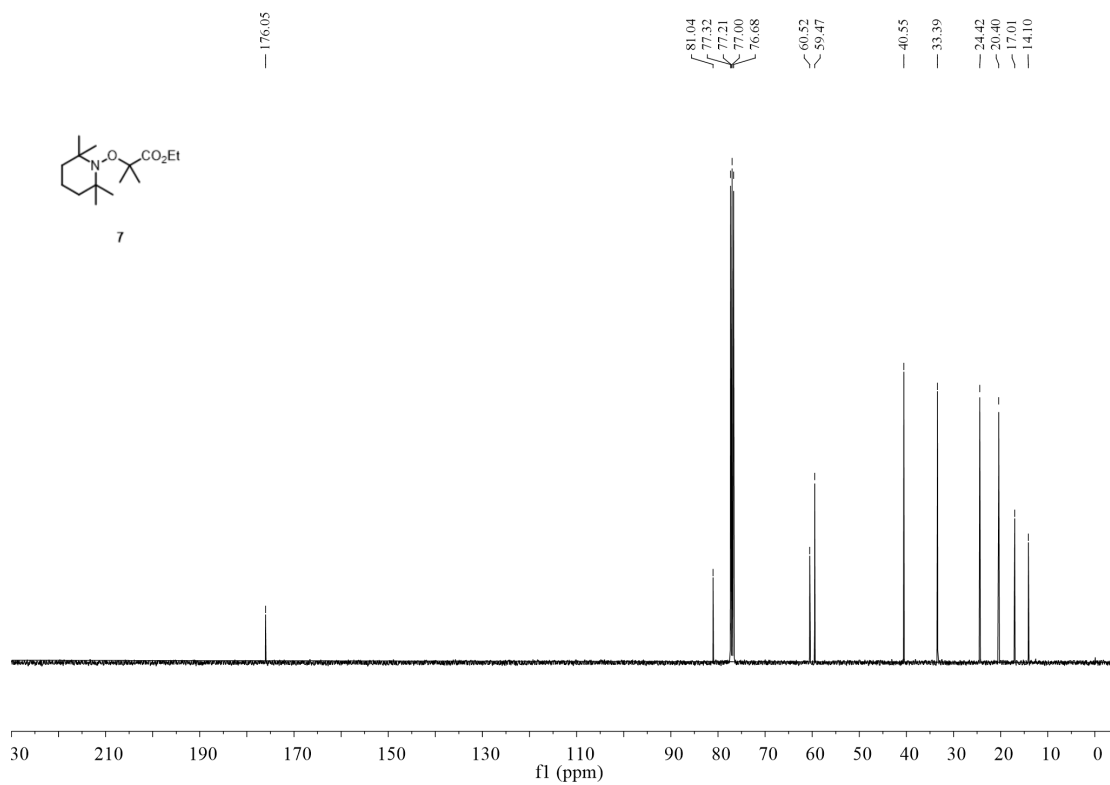

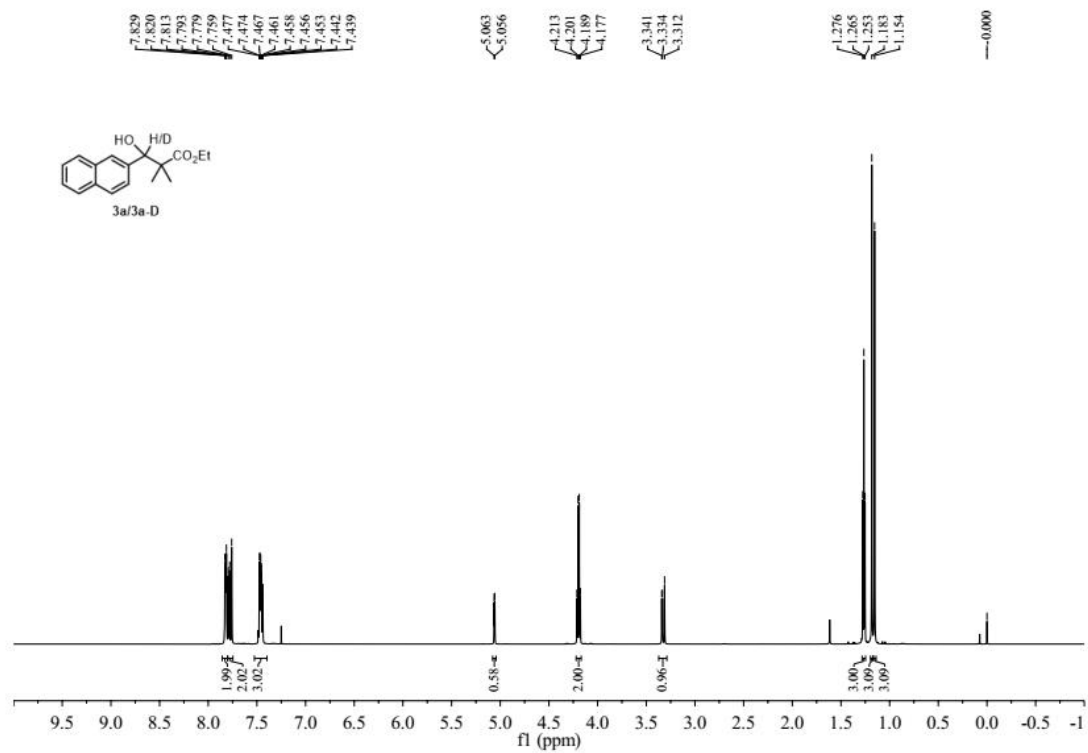

Supplement: d3cc04671k1.pdf [file d3cc04671k1.pdf]
